# Supplementary material
Source: publisher figshare collection journal article supplement (https://acs.figshare.com/ndownloader/files/13170911)
Supplement: Supplementary file 1 [file 13170911]

## Supporting information

### Neolignan Constituents with Potential Beneficial Effects in Prevention of Type 2 Diabetes from *Viburnum fordiae* Hance Fruits

Chunchao Zhao,<sup>\*,†,‡</sup> Jia Chen,<sup>†</sup> Jianhua Shao,<sup>\*,†</sup> Jie Shen,<sup>†</sup> Kehuan Li,<sup>‡</sup> Wenyan Gu,<sup>‡</sup> Sihui Li,<sup>‡</sup> and Judi Fan<sup>§</sup>

<sup>†</sup>Jiangsu Key Laboratory of Crop Genetics and Physiology/Co-Innovation Center for Modern Production Technology of Grain Crops, Yangzhou University, Yangzhou 225009, China

<sup>‡</sup>Joint International Research Laboratory of Agriculture & Agri-Product Safety of Ministry of Education of China, Yangzhou University, Yangzhou 225009, China

<sup>§</sup>School of Pharmacy, Guizhou Medical University, Guiyang 550004, China

\* Corresponding authors. Tel: +86-514-87991556. E-mail: [cczhao@yzu.edu.cn](mailto:cczhao@yzu.edu.cn), [jhshao@yzu.edu.cn](mailto:jhshao@yzu.edu.cn).

## Supplementary Material

### List of supporting information

|     |                                                                                                       |    |
|-----|-------------------------------------------------------------------------------------------------------|----|
| 1.  | <b>Figure S1.</b> The IR Spectrum of Compound <b>1</b>                                                | 4  |
| 2.  | <b>Figure S2.</b> The (+)-HRESIMS Spectrum of Compound <b>1</b>                                       | 4  |
| 3.  | <b>Figure S3.</b> The $^1\text{H}$ NMR Spectrum of Compound <b>1</b> in $\text{DMSO-}d_6$             | 5  |
| 4.  | <b>Figure S4.</b> The $^{13}\text{C}$ NMR Spectrum of Compound <b>1</b> in $\text{DMSO-}d_6$          | 5  |
| 5.  | <b>Figure S5.</b> The $^1\text{H-}^1\text{H}$ COSY Spectrum of Compound <b>1</b> in $\text{DMSO-}d_6$ | 6  |
| 6.  | <b>Figure S6.</b> The NOESY Spectrum of Compound <b>1</b> in $\text{DMSO-}d_6$                        | 6  |
| 7.  | <b>Figure S7.</b> The HSQC Spectrum of Compound <b>1</b> in $\text{DMSO-}d_6$                         | 7  |
| 8.  | <b>Figure S8.</b> The HMBC Spectrum of Compound <b>1</b> in $\text{DMSO-}d_6$                         | 7  |
| 9.  | <b>Figure S9.</b> The HSQC-TOCSY Spectrum of Compound <b>1</b> in $\text{DMSO-}d_6$                   | 8  |
| 10. | <b>Figure S10.</b> The CD Spectrum of Compound <b>1</b> in MeOH                                       | 8  |
| 11. | <b>Figure S11.</b> The IR Spectrum of Compound <b>2</b>                                               | 9  |
| 12. | <b>Figure S12.</b> The (+)-HRESIMS Spectrum of Compound <b>2</b>                                      | 9  |
| 13. | <b>Figure S13.</b> The $^1\text{H}$ NMR Spectrum of Compound <b>2</b> in $\text{DMSO-}d_6$            | 10 |
| 14. | <b>Figure S14.</b> The $^{13}\text{C}$ NMR Spectrum of Compound <b>2</b> in $\text{DMSO-}d_6$         | 10 |
| 15. | <b>Figure S15.</b> The NOESY Spectrum of Compound <b>2</b> in $\text{DMSO-}d_6$                       | 11 |
| 16. | <b>Figure S16.</b> The HSQC Spectrum of Compound <b>2</b> in $\text{DMSO-}d_6$                        | 11 |
| 17. | <b>Figure S17.</b> The HMBC Spectrum of Compound <b>2</b> in $\text{DMSO-}d_6$                        | 12 |
| 18. | <b>Figure S18.</b> The HSQC-TOCSY Spectrum of Compound <b>2</b> in $\text{DMSO-}d_6$                  | 12 |
| 19. | <b>Figure S19.</b> The CD Spectrum of Compound <b>2</b> in MeOH                                       | 13 |
| 20. | <b>Figure S20.</b> The IR Spectrum of Compound <b>3</b>                                               | 13 |
| 21. | <b>Figure S21.</b> The (+)-HRESIMS Spectrum of Compound <b>3</b>                                      | 14 |
| 22. | <b>Figure S22.</b> The $^1\text{H}$ NMR Spectrum of Compound <b>3</b> in $\text{DMSO-}d_6$            | 14 |
| 23. | <b>Figure S23.</b> The $^{13}\text{C}$ NMR Spectrum of Compound <b>3</b> in $\text{DMSO-}d_6$         | 15 |
| 24. | <b>Figure S24.</b> The NOESY Spectrum of Compound <b>3</b> in $\text{DMSO-}d_6$                       | 15 |
| 25. | <b>Figure S25.</b> The HSQC Spectrum of Compound <b>3</b> in $\text{DMSO-}d_6$                        | 16 |
| 26. | <b>Figure S26.</b> The HMBC Spectrum of Compound <b>3</b> in $\text{DMSO-}d_6$                        | 16 |
| 27. | <b>Figure S27.</b> The HSQC-TOCSY Spectrum of Compound <b>3</b> in $\text{DMSO-}d_6$                  | 17 |
| 28. | <b>Figure S28.</b> The CD Spectrum of Compound <b>3</b> in MeOH                                       | 17 |
| 29. | <b>Figure S29.</b> The IR Spectrum of Compound <b>4</b>                                               | 18 |
| 30. | <b>Figure S30.</b> The (+)-HRESIMS Spectrum of Compound <b>4</b>                                      | 18 |
| 31. | <b>Figure S31.</b> The $^1\text{H}$ NMR Spectrum of Compound <b>4</b> in $\text{DMSO-}d_6$            | 19 |
| 32. | <b>Figure S32.</b> The $^{13}\text{C}$ NMR Spectrum of Compound <b>4</b> in $\text{DMSO-}d_6$         | 19 |

|     |                                                                                                         |    |
|-----|---------------------------------------------------------------------------------------------------------|----|
| 33. | <b>Figure S33.</b> The NOESY Spectrum of Compound <b>4</b> in DMSO- <i>d</i> <sub>6</sub>               | 20 |
| 34. | <b>Figure S34.</b> The HSQC Spectrum of Compound <b>4</b> in DMSO- <i>d</i> <sub>6</sub>                | 20 |
| 35. | <b>Figure S35.</b> The HMBC Spectrum of Compound <b>4</b> in DMSO- <i>d</i> <sub>6</sub>                | 21 |
| 36. | <b>Figure S36.</b> The CD Spectrum of Compound <b>4</b> in MeOH                                         | 21 |
| 37. | <b>Figure S37.</b> The IR Spectrum of Compound <b>5</b>                                                 | 22 |
| 38. | <b>Figure S38.</b> The (+)-HRESIMS Spectrum of Compound <b>5</b>                                        | 22 |
| 39. | <b>Figure S39.</b> The <sup>1</sup> H NMR Spectrum of Compound <b>5</b> in DMSO- <i>d</i> <sub>6</sub>  | 23 |
| 40. | <b>Figure S40.</b> The <sup>13</sup> C NMR Spectrum of Compound <b>5</b> in DMSO- <i>d</i> <sub>6</sub> | 23 |
| 41. | <b>Figure S41.</b> The NOESY Spectrum of Compound <b>5</b> in DMSO- <i>d</i> <sub>6</sub>               | 24 |
| 42. | <b>Figure S42.</b> The HSQC Spectrum of Compound <b>5</b> in DMSO- <i>d</i> <sub>6</sub>                | 24 |
| 43. | <b>Figure S43.</b> The HMBC Spectrum of Compound <b>5</b> in DMSO- <i>d</i> <sub>6</sub>                | 25 |
| 44. | <b>Figure S44.</b> The HSQC-TOCSY Spectrum of Compound <b>5</b> in DMSO- <i>d</i> <sub>6</sub>          | 25 |
| 45. | <b>Figure S45.</b> The CD Spectrum of Compound <b>5</b> in MeOH                                         | 26 |
| 46. | <b>Figure S46.</b> The IR Spectrum of Compound <b>6</b>                                                 | 26 |
| 47. | <b>Figure S47.</b> The (+)-HRESIMS Spectrum of Compound <b>6</b>                                        | 27 |
| 48. | <b>Figure S48.</b> The <sup>1</sup> H NMR Spectrum of Compound <b>6</b> in DMSO- <i>d</i> <sub>6</sub>  | 27 |
| 49. | <b>Figure S49.</b> The <sup>13</sup> C NMR Spectrum of Compound <b>6</b> in DMSO- <i>d</i> <sub>6</sub> | 28 |
| 50. | <b>Figure S50.</b> The NOESY Spectrum of Compound <b>6</b> in DMSO- <i>d</i> <sub>6</sub>               | 28 |
| 51. | <b>Figure S51.</b> The HSQC Spectrum of Compound <b>6</b> in DMSO- <i>d</i> <sub>6</sub>                | 29 |
| 52. | <b>Figure S52.</b> The HMBC Spectrum of Compound <b>6</b> in DMSO- <i>d</i> <sub>6</sub>                | 29 |
| 53. | <b>Figure S53.</b> The HSQC-TOCSY Spectrum of Compound <b>6</b> in DMSO- <i>d</i> <sub>6</sub>          | 30 |
| 54. | <b>Figure S54.</b> The CD Spectrum of Compound <b>6</b> in MeOH                                         | 30 |
| 55. | <b>Figure S55.</b> The IR Spectrum of Compound <b>7</b>                                                 | 31 |
| 56. | <b>Figure S56.</b> The (+)-HRESIMS Spectrum of Compound <b>7</b>                                        | 31 |
| 57. | <b>Figure S57.</b> The <sup>1</sup> H NMR Spectrum of Compound <b>7</b> in CD <sub>3</sub> OD           | 32 |
| 58. | <b>Figure S58.</b> The <sup>1</sup> H NMR Spectrum of Compound <b>7a</b> in CDCl <sub>3</sub>           | 32 |
| 59. | <b>Figure S59.</b> The <sup>13</sup> C NMR Spectrum of Compound <b>7</b> in CD <sub>3</sub> OD          | 33 |
| 60. | <b>Figure S60.</b> The NOESY Spectrum of Compound <b>7</b> in CD <sub>3</sub> OD                        | 33 |
| 61. | <b>Figure S61.</b> The HSQC Spectrum of Compound <b>7</b> in CD <sub>3</sub> OD                         | 34 |
| 62. | <b>Figure S62.</b> The HMBC Spectrum of Compound <b>7</b> in CD <sub>3</sub> OD                         | 34 |
| 63. | <b>Figure S63.</b> The CD Spectrum of Compound <b>7</b> in MeOH                                         | 35 |
| 64. | <b>Figure S64.</b> The IR Spectrum of Compound <b>8</b>                                                 | 35 |
| 65. | <b>Figure S65.</b> The (+)-HRESIMS Spectrum of Compound <b>8</b>                                        | 36 |
| 66. | <b>Figure S66.</b> The <sup>1</sup> H NMR Spectrum of Compound <b>8</b> in CD <sub>3</sub> OD           | 36 |
| 67. | <b>Figure S67.</b> The <sup>1</sup> H NMR Spectrum of Compound <b>8a</b> in CDCl <sub>3</sub>           | 37 |

|      |                                                                                                                                                             |    |
|------|-------------------------------------------------------------------------------------------------------------------------------------------------------------|----|
| 68.  | <b>Figure S68.</b> The $^{13}\text{C}$ NMR Spectrum of Compound <b>8</b> in $\text{CD}_3\text{OD}$                                                          | 37 |
| 69.  | <b>Figure S69.</b> The NOESY Spectrum of Compound <b>8</b> in $\text{CD}_3\text{OD}$                                                                        | 38 |
| 70.  | <b>Figure S70.</b> The HSQC Spectrum of Compound <b>8</b> in $\text{CD}_3\text{OD}$                                                                         | 38 |
| 71.  | <b>Figure S71.</b> The HMBC Spectrum of Compound <b>8</b> in $\text{CD}_3\text{OD}$                                                                         | 39 |
| 72.  | <b>Figure S72.</b> The CD Spectrum of Compound <b>8</b> in MeOH                                                                                             | 39 |
| 73.  | <b>Figure S73.</b> The IR Spectrum of Compound <b>9</b>                                                                                                     | 40 |
| 74.  | <b>Figure S74.</b> The (+)-HRESIMS Spectrum of Compound <b>9</b>                                                                                            | 40 |
| 75.  | <b>Figure S75.</b> The $^1\text{H}$ NMR Spectrum of Compound <b>9</b> in $\text{CD}_3\text{OD}$                                                             | 41 |
| 76.  | <b>Figure S76.</b> The $^1\text{H}$ NMR Spectrum of Compound <b>9a</b> in $\text{CDCl}_3$                                                                   | 41 |
| 77.  | <b>Figure S77.</b> The $^{13}\text{C}$ NMR Spectrum of Compound <b>9</b> in $\text{CD}_3\text{OD}$                                                          | 42 |
| 78.  | <b>Figure S78.</b> The NOESY Spectrum of Compound <b>9</b> in $\text{CD}_3\text{OD}$                                                                        | 42 |
| 79.  | <b>Figure S79.</b> The HSQC Spectrum of Compound <b>9</b> in $\text{CD}_3\text{OD}$                                                                         | 43 |
| 80.  | <b>Figure S80.</b> The HMBC Spectrum of Compound <b>9</b> in $\text{CD}_3\text{OD}$                                                                         | 43 |
| 81.  | <b>Figure S81.</b> The CD Spectrum of Compound <b>9</b> in MeOH                                                                                             | 44 |
| 82.  | <b>Figure S82.</b> The IR Spectrum of Compound <b>10</b>                                                                                                    | 44 |
| 83.  | <b>Figure S83.</b> The (+)-HRESIMS Spectrum of Compound <b>10</b>                                                                                           | 45 |
| 84.  | <b>Figure S84.</b> The $^1\text{H}$ NMR Spectrum of Compound <b>10</b> in $\text{DMSO}-d_6$                                                                 | 45 |
| 85.  | <b>Figure S85.</b> The $^1\text{H}$ NMR Spectrum of Compound <b>10</b> in $\text{CDCl}_3$                                                                   | 46 |
| 86.  | <b>Figure S86.</b> The $^{13}\text{C}$ NMR Spectrum of Compound <b>10</b> in $\text{DMSO}-d_6$                                                              | 46 |
| 87.  | <b>Figure S87.</b> The HSQC Spectrum of Compound <b>10</b> in $\text{DMSO}-d_6$                                                                             | 47 |
| 88.  | <b>Figure S88.</b> The HMBC Spectrum of Compound <b>10</b> in $\text{DMSO}-d_6$                                                                             | 47 |
| 89.  | <b>Figure S89.</b> The CD Spectrum of Compound <b>10</b> in MeOH                                                                                            | 48 |
| 90.  | <b>Figure S90.</b> The IR Spectrum of Compound <b>11</b>                                                                                                    | 48 |
| 91.  | <b>Figure S91.</b> The (+)-HRESIMS Spectrum of Compound <b>11</b>                                                                                           | 49 |
| 92.  | <b>Figure S92.</b> The $^1\text{H}$ NMR Spectrum of Compound <b>11</b> in $\text{DMSO}-d_6$                                                                 | 49 |
| 93.  | <b>Figure S93.</b> The $^1\text{H}$ NMR Spectrum of Compound <b>11</b> in $\text{CDCl}_3$                                                                   | 50 |
| 94.  | <b>Figure S94.</b> The $^{13}\text{C}$ NMR Spectrum of Compound <b>11</b> in $\text{DMSO}-d_6$                                                              | 50 |
| 95.  | <b>Figure S95.</b> The HSQC Spectrum of Compound <b>11</b> in $\text{DMSO}-d_6$                                                                             | 51 |
| 96.  | <b>Figure S96.</b> The HMBC Spectrum of Compound <b>11</b> in $\text{DMSO}-d_6$                                                                             | 51 |
| 97.  | <b>Figure S97.</b> The CD Spectrum of Compound <b>11</b> in MeOH                                                                                            | 52 |
| 98.  | <b>Table S98.</b> The $^1\text{H}$ NMR (600 MHz, $\text{CDCl}_3$ ) spectroscopic data of <b>7a–9a</b> , <b>10</b> , <b>11</b>                               | 52 |
| 99.  | <b>Table S99.</b> The ORD values of <b>7a–9a</b> , <b>12a</b>                                                                                               | 53 |
| 100. | <b>Table S100.</b> $\alpha$ -Glucosidase inhibitory, free radical scavenging and anti-inflammatory activities of the extracts from <i>V.fordiae</i> fruits. | 53 |

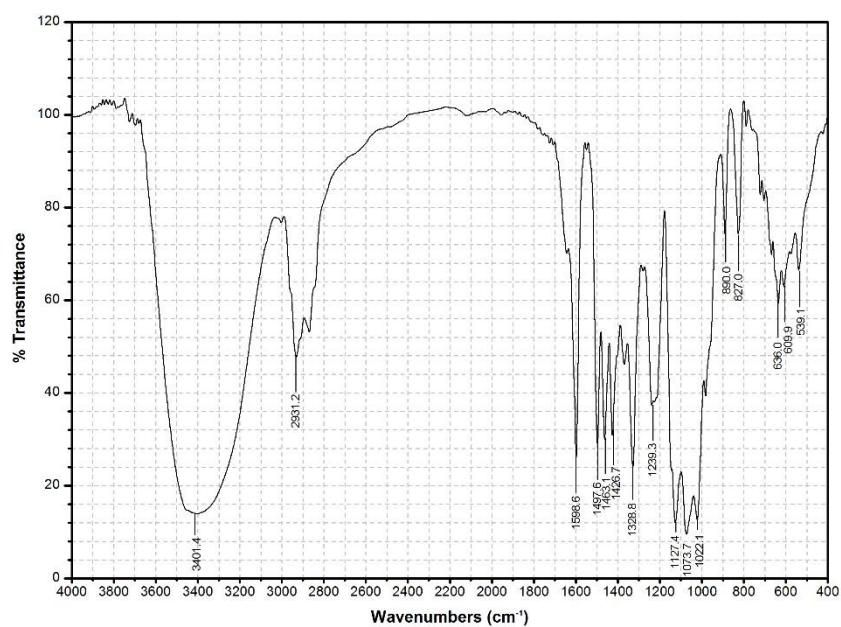

**Figure S1.** The IR Spectrum of Compound **1**.

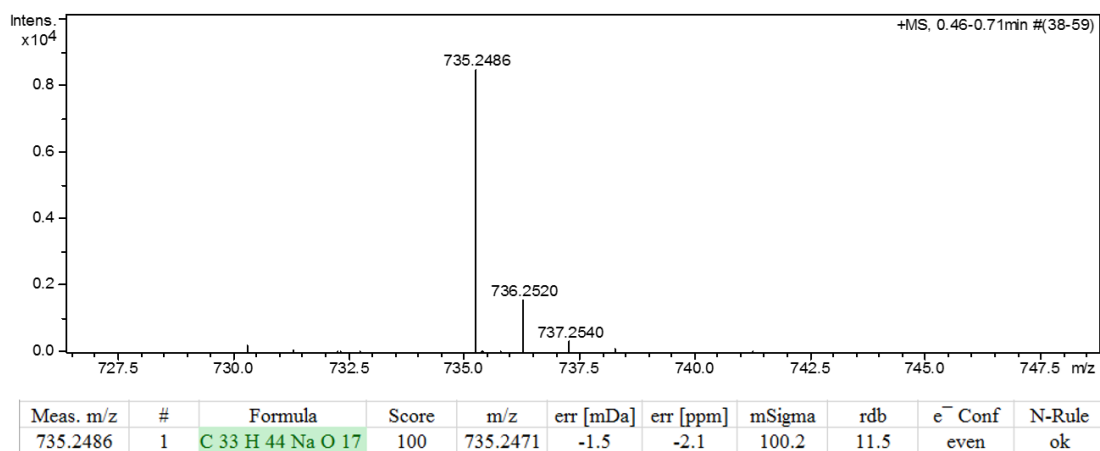

**Figure S2.** The (+)-HRESIMS Spectrum of Compound **1**.

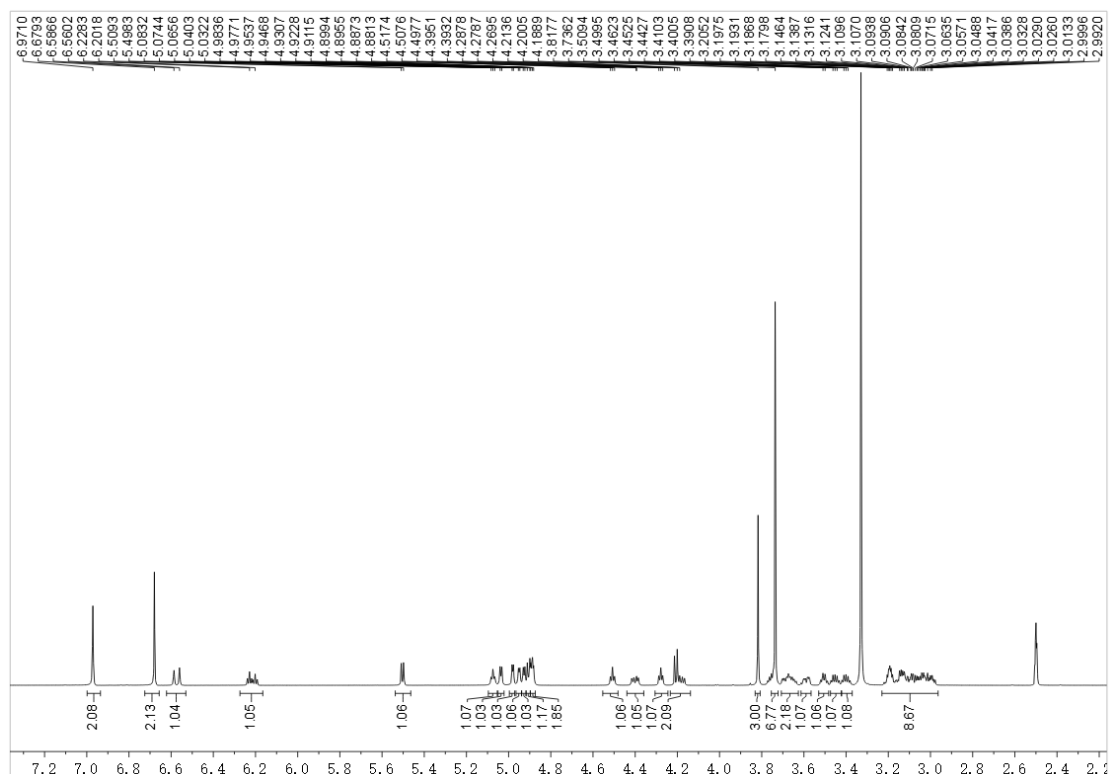

**Figure S3.** The  $^1\text{H}$  NMR Spectrum of Compound **1** in  $\text{DMSO-}d_6$ .

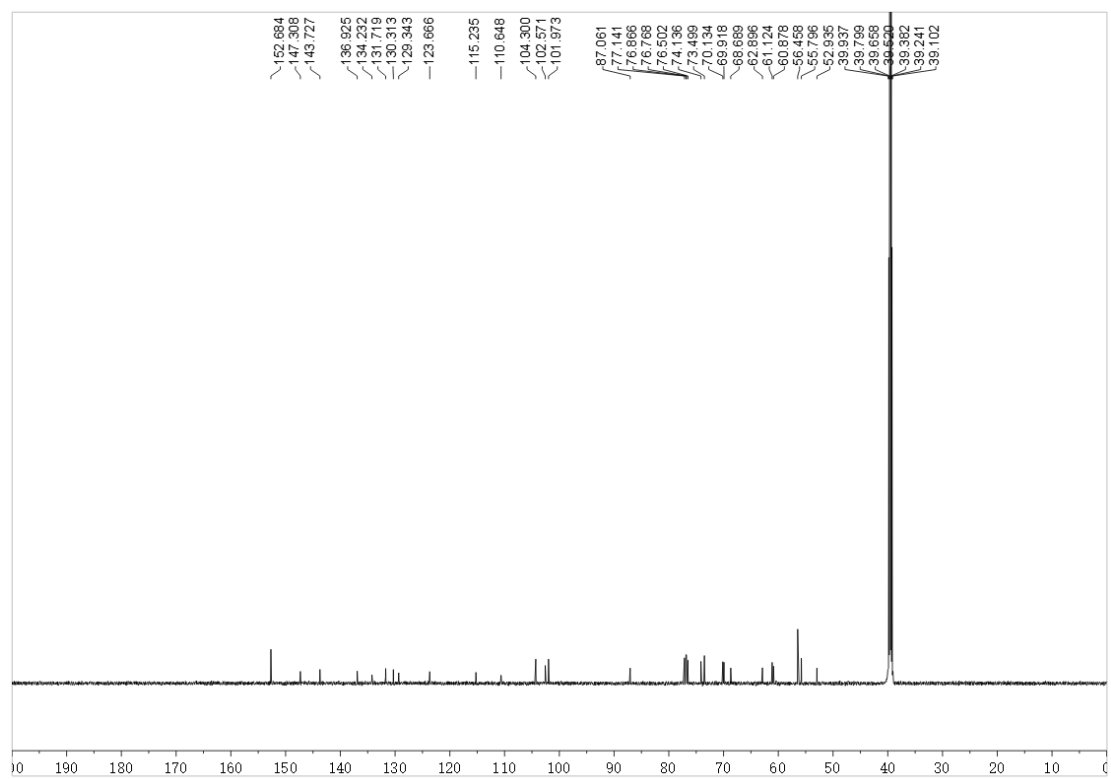

**Figure S4.** The  $^{13}\text{C}$  NMR Spectrum of Compound **1** in  $\text{DMSO-}d_6$ .

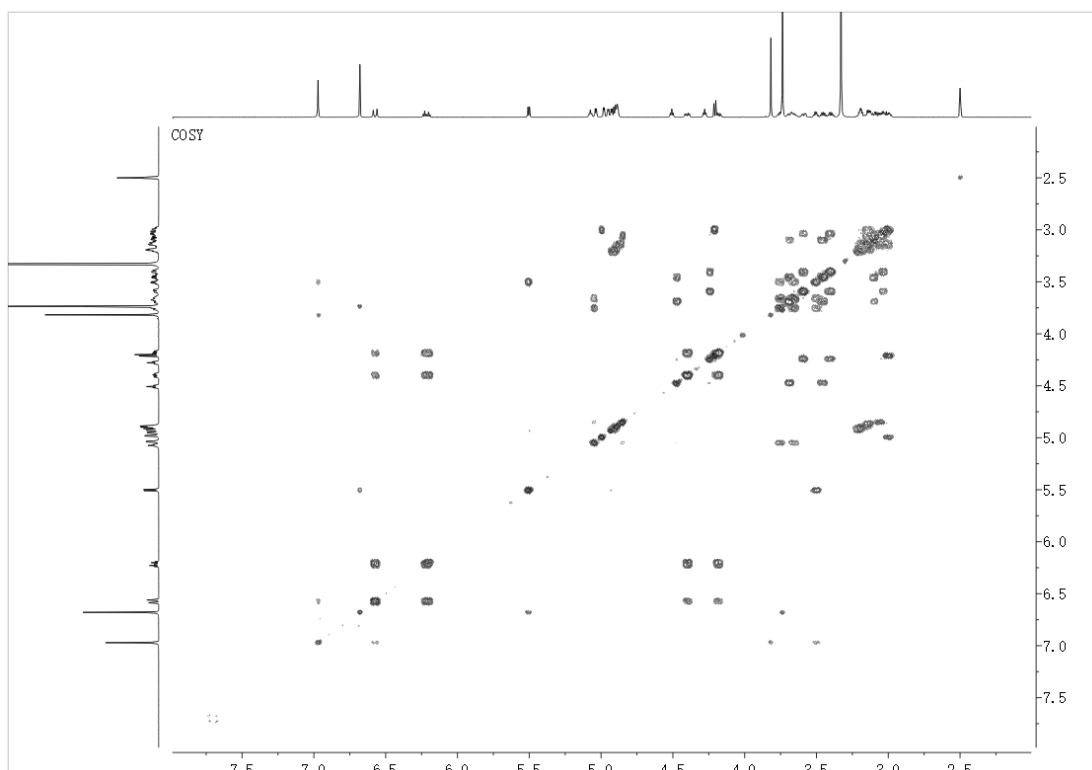

**Figure S5.** The  $^1\text{H}$ - $^1\text{H}$  COSY Spectrum of Compound **1** in  $\text{DMSO}-d_6$ .

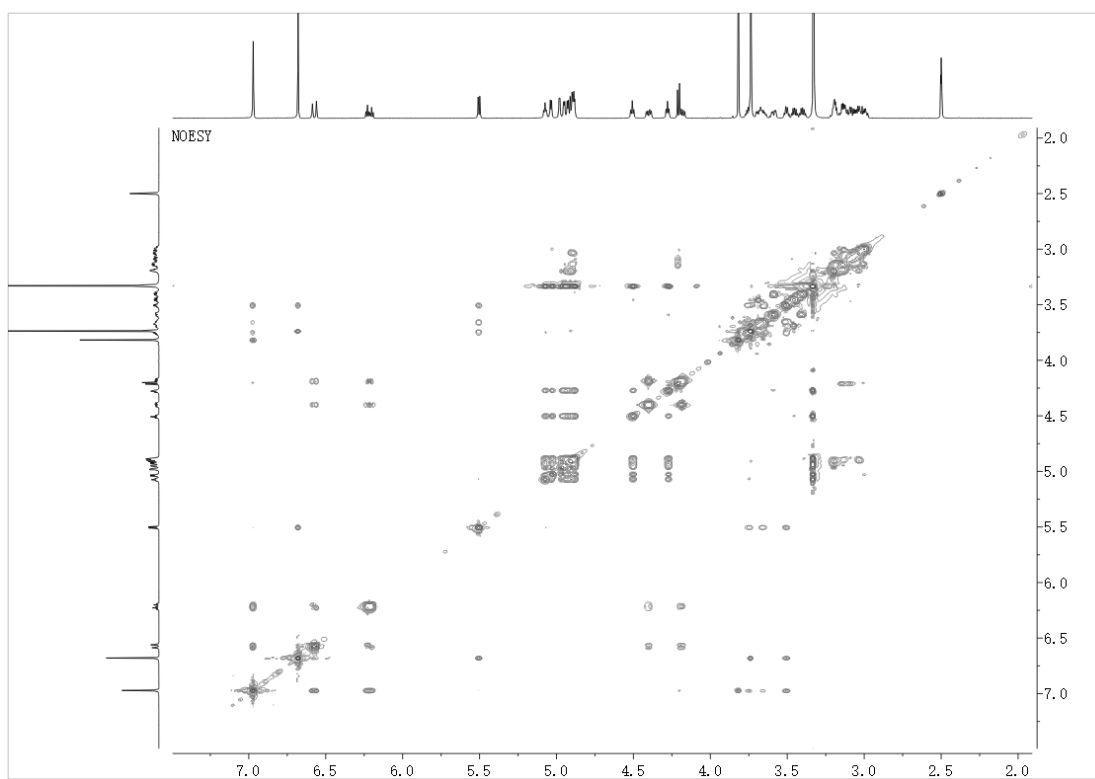

**Figure S6.** The NOESY Spectrum of Compound **1** in  $\text{DMSO}-d_6$ .

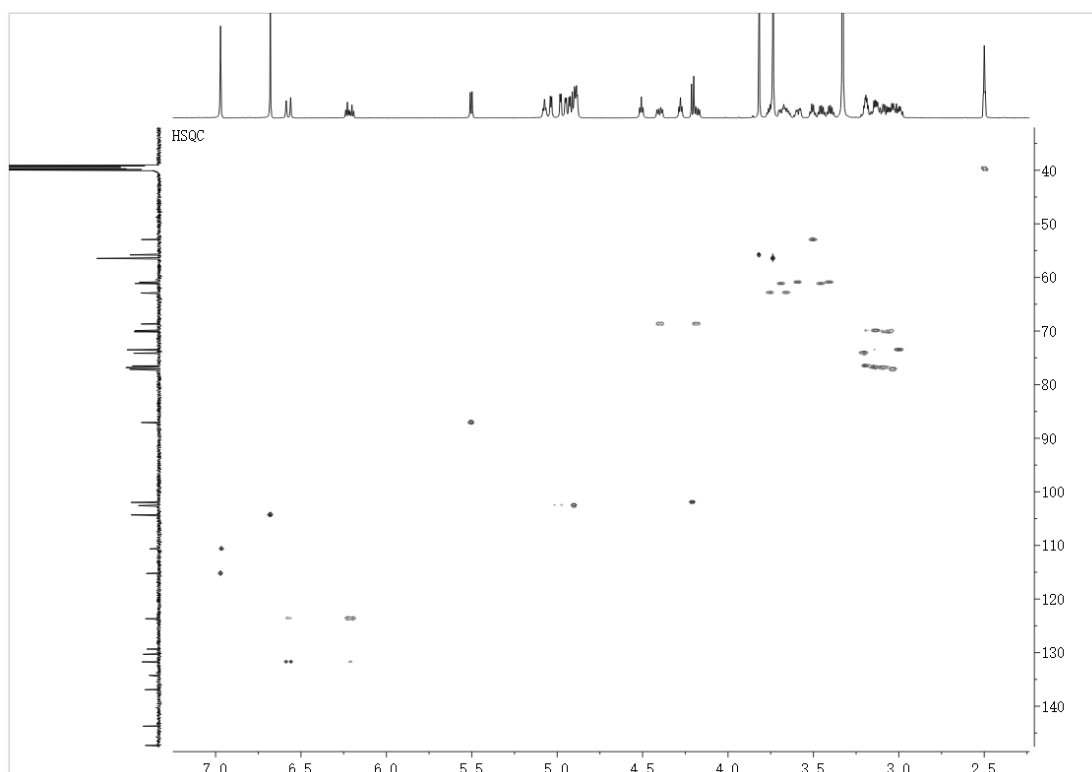

**Figure S7.** The HSQC Spectrum of Compound **1** in DMSO- $d_6$ .

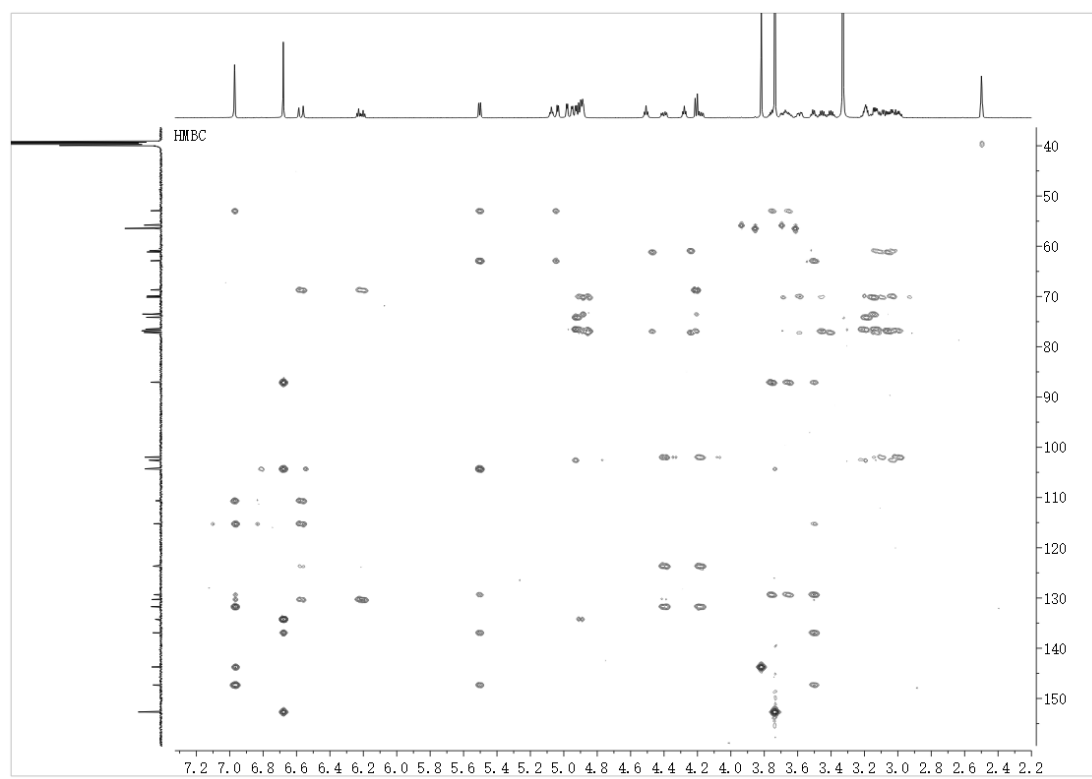

**Figure S8.** The HMBC Spectrum of Compound **1** in DMSO- $d_6$ .



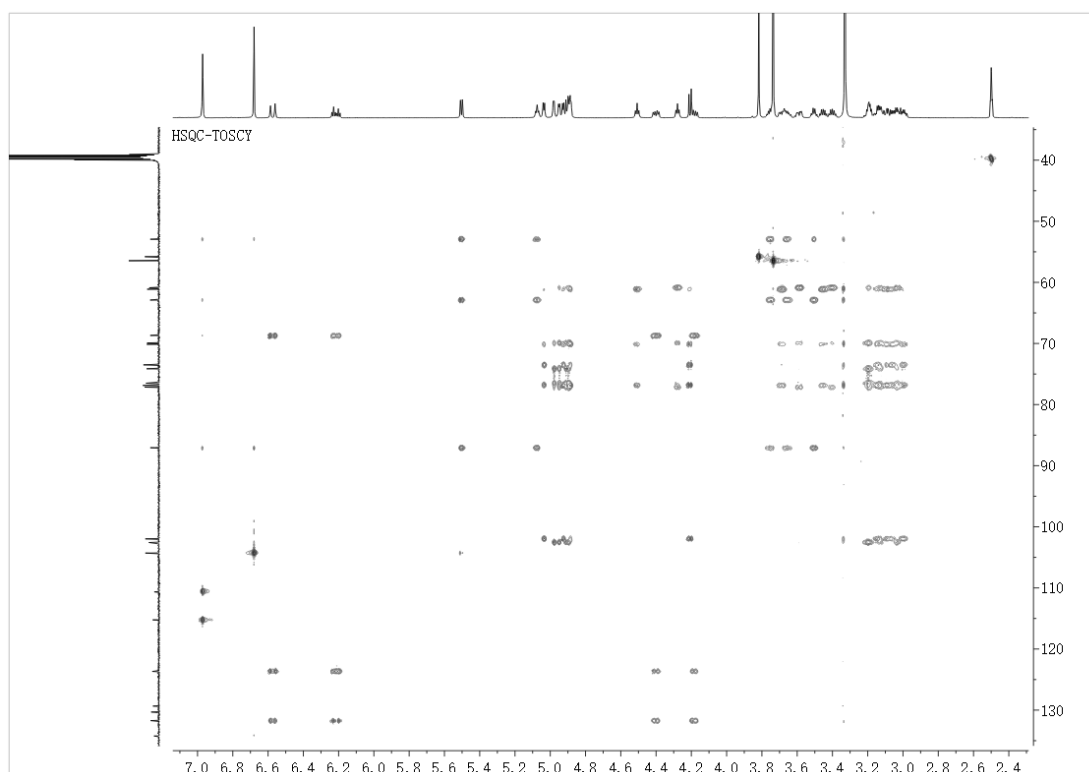

**Figure S9.** The HSQC-TOCSY Spectrum of Compound **1** in DMSO- $d_6$ .

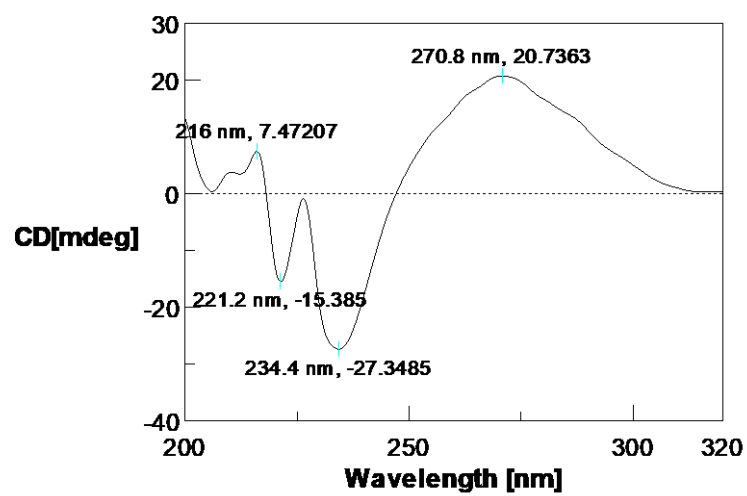

**Figure S10.** The CD Spectrum of Compound **1** in MeOH.

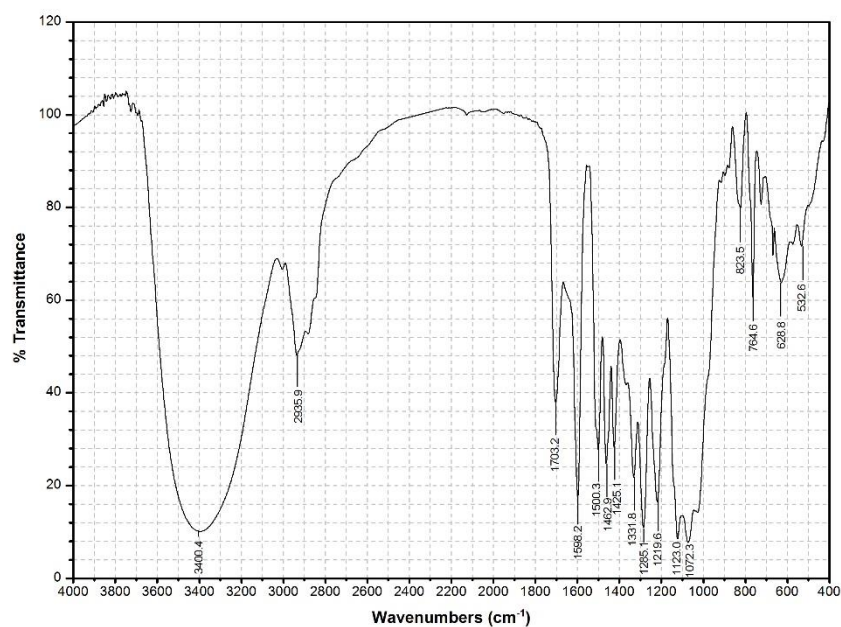

**Figure S11.** The IR Spectrum of Compound **2**.

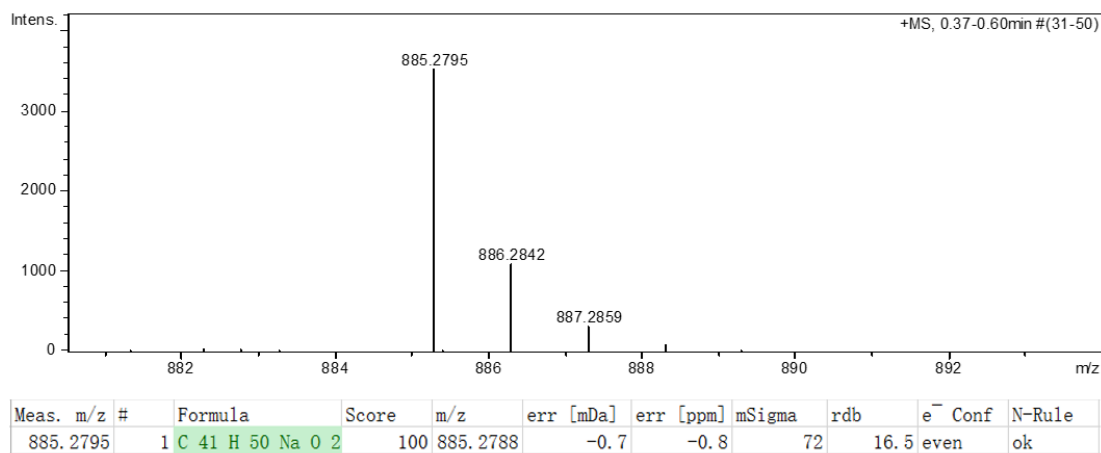

**Figure S12.** The (+)-HRESIMS Spectrum of Compound **2**.

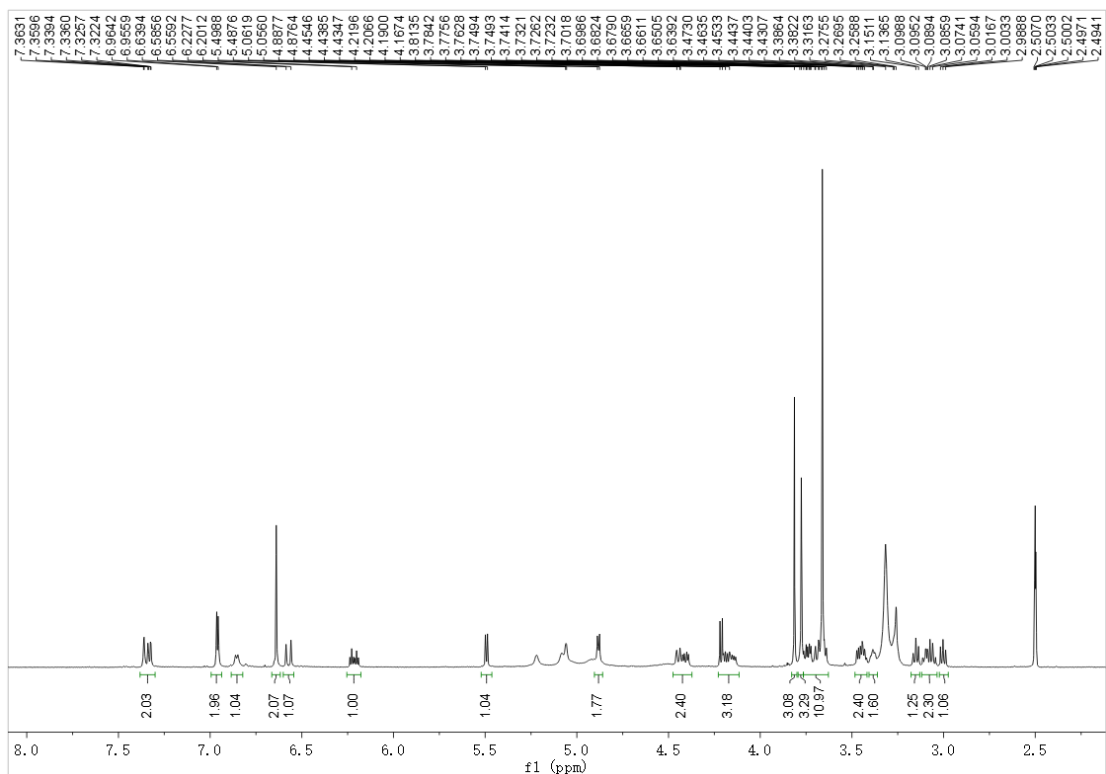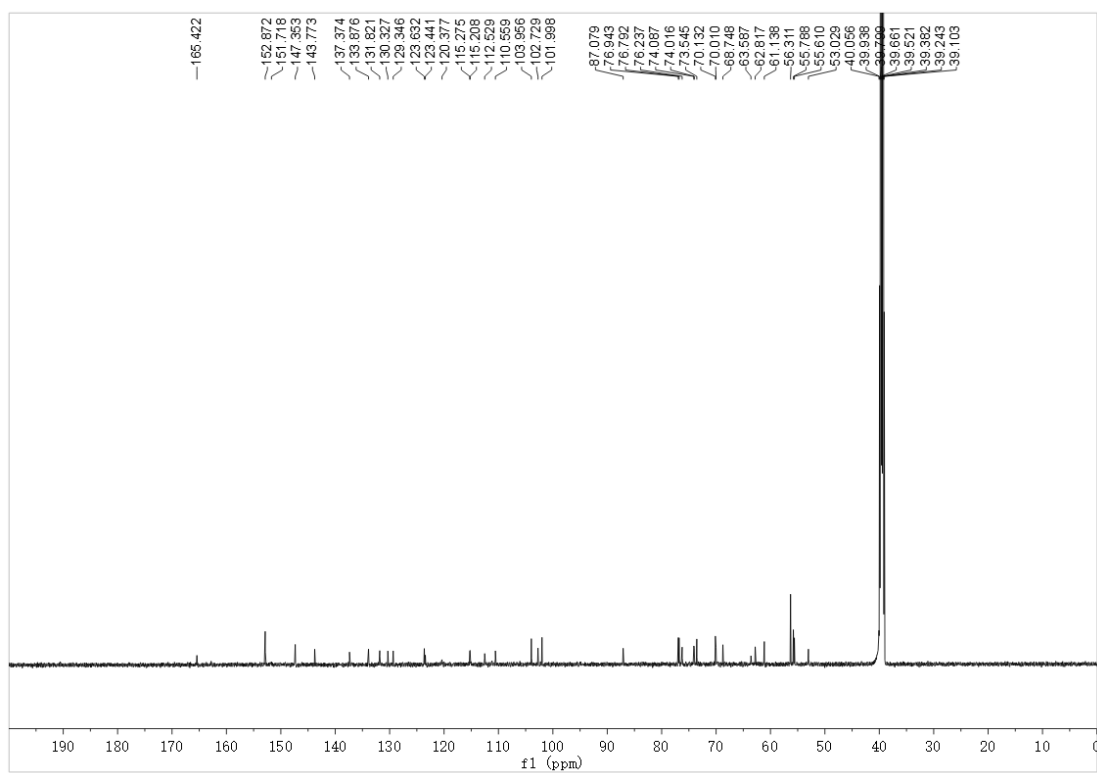

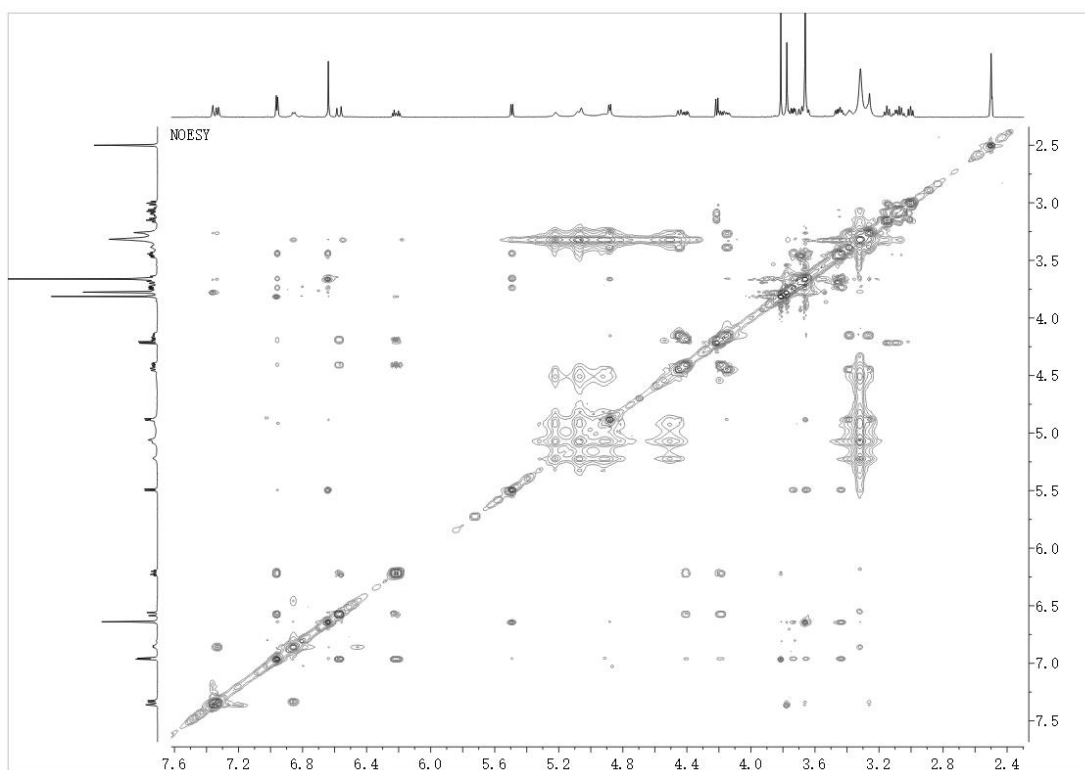

**Figure S15.** The NOESY Spectrum of Compound **2** in DMSO- $d_6$ .

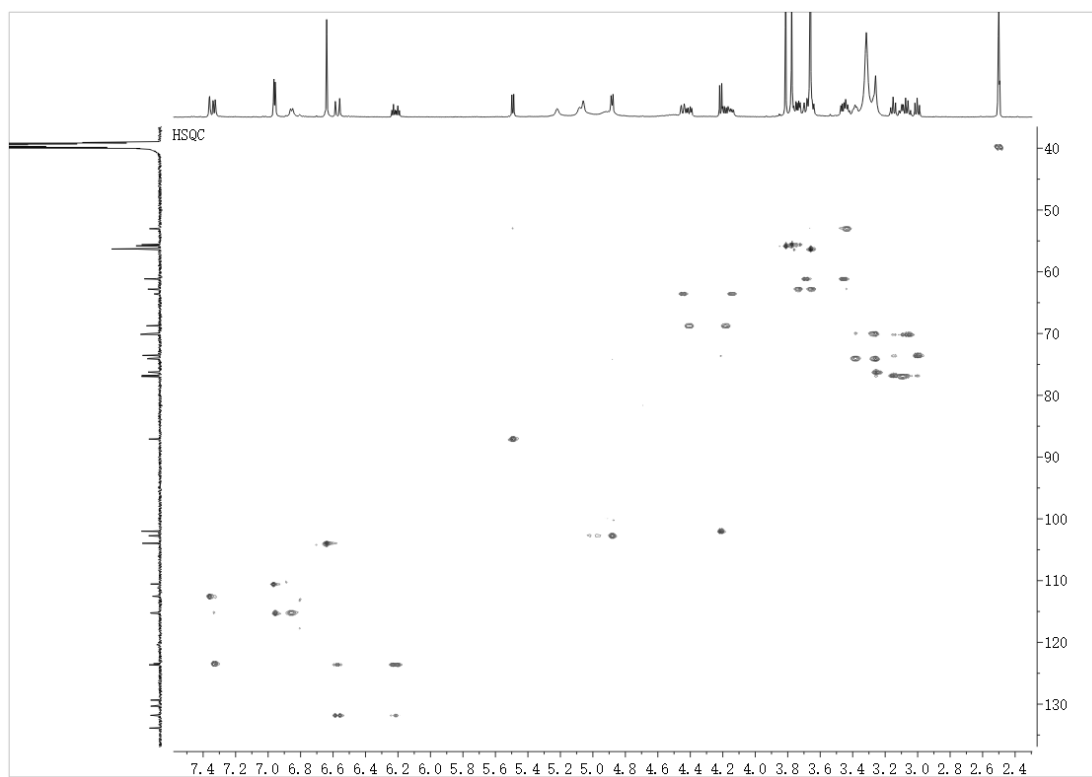

**Figure S16.** The HSQC Spectrum of Compound **2** in DMSO- $d_6$ .

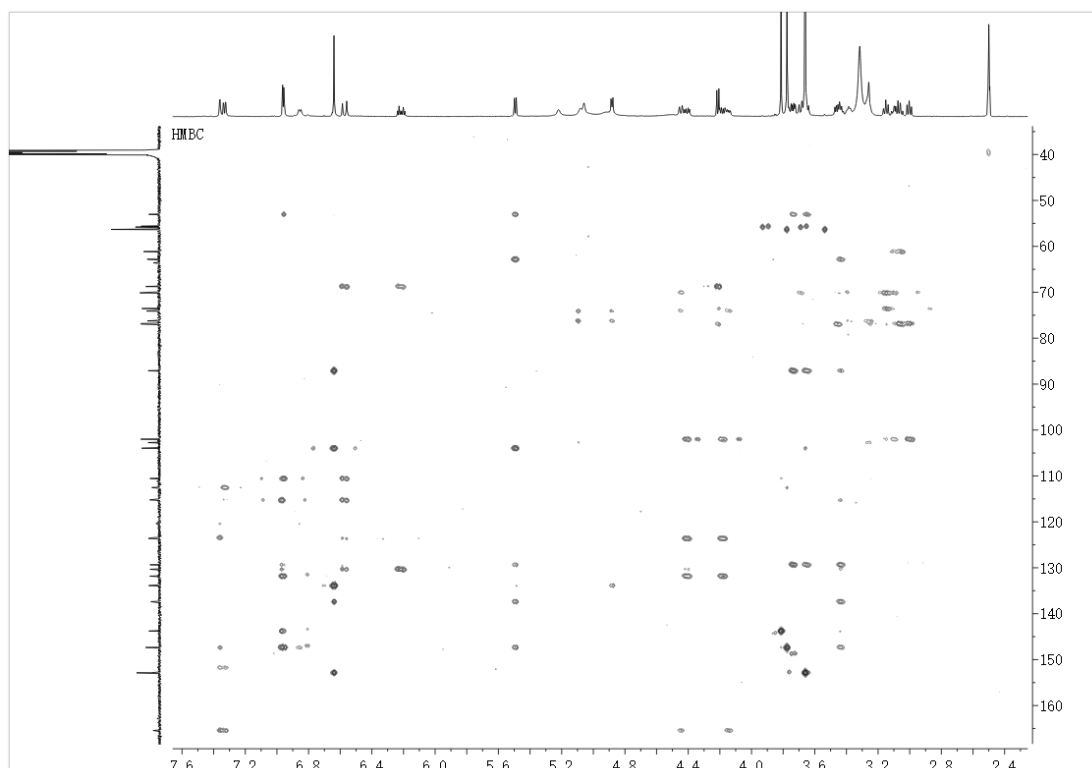

**Figure S17.** The HMBC Spectrum of Compound **2** in DMSO- $d_6$ .

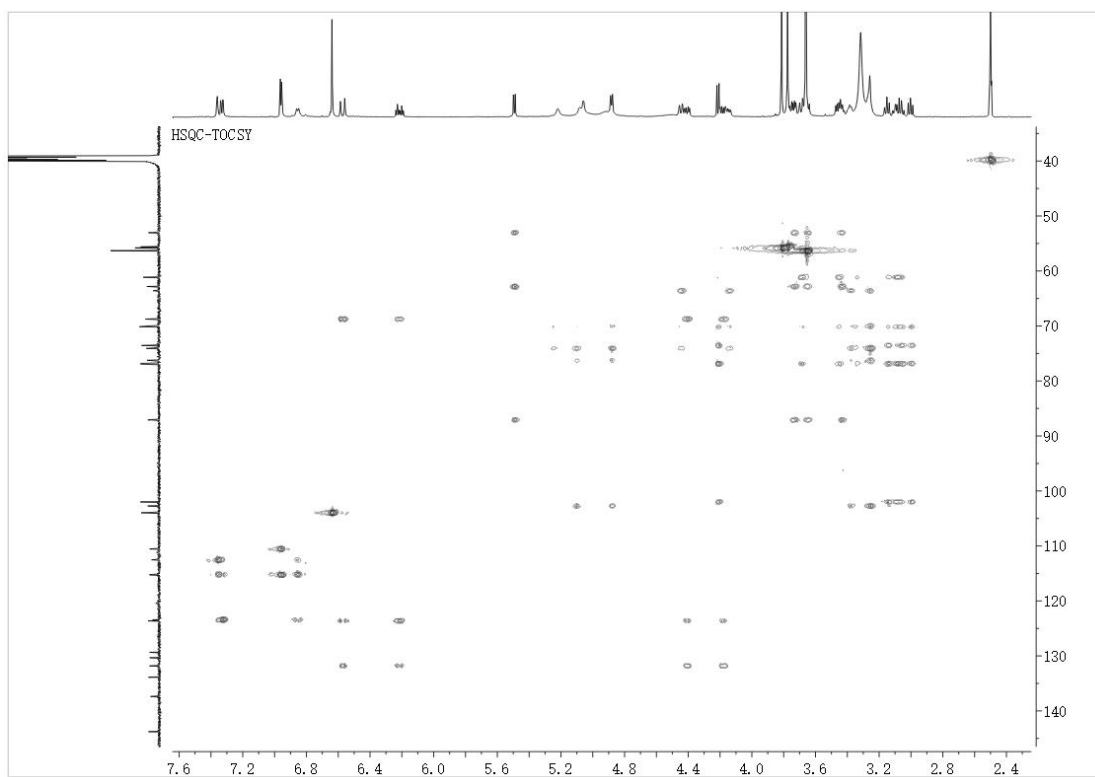

**Figure S18.** The HSQC-TOCSY Spectrum of Compound **2** in DMSO- $d_6$ .

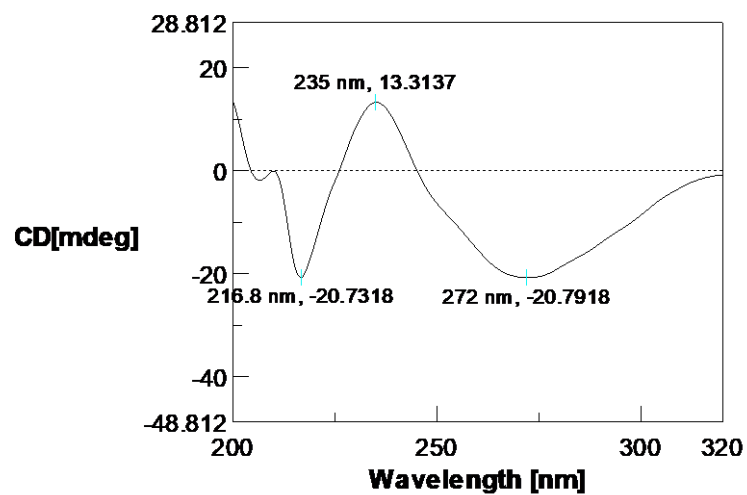

**Figure S19.** The CD Spectrum of Compound **2** in MeOH.

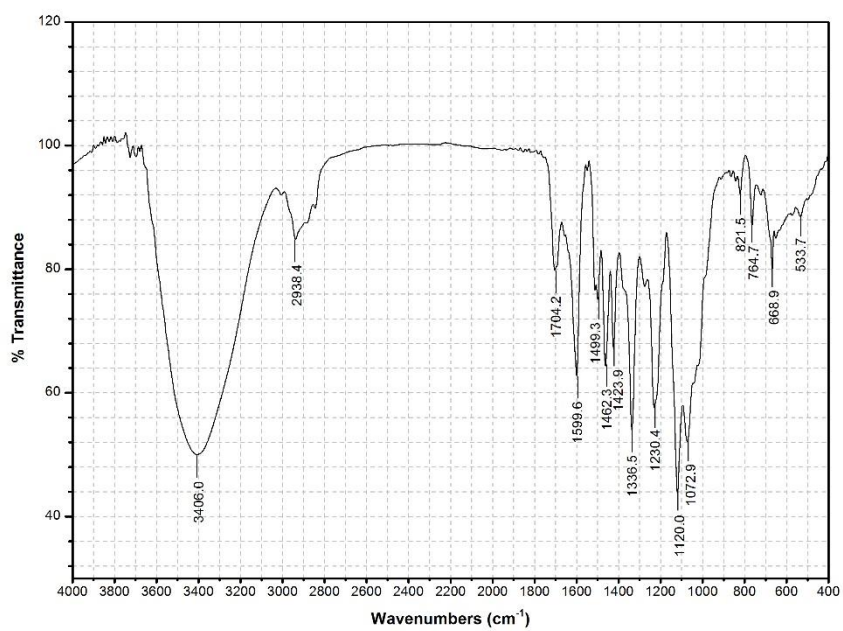

**Figure S20.** The IR Spectrum of Compound **3**.

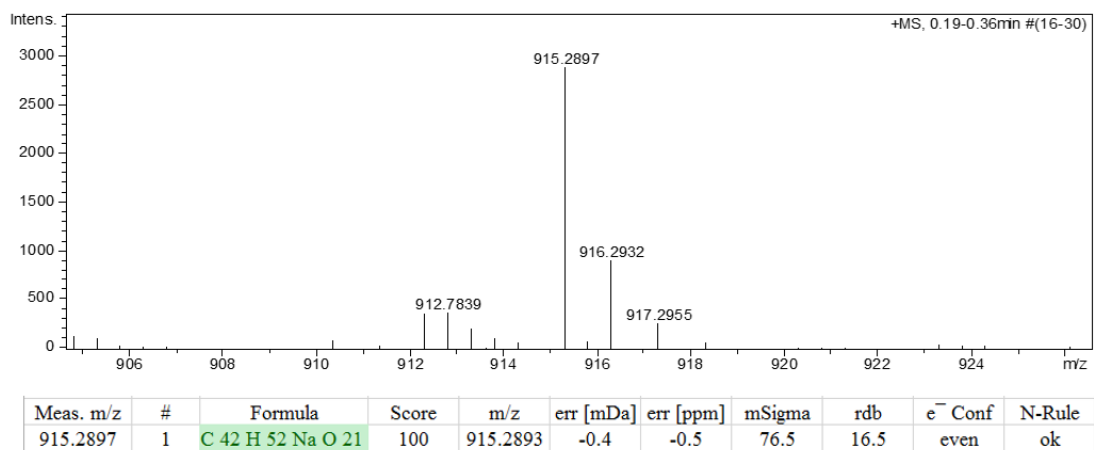

**Figure S21.** The (+)-HRESIMS Spectrum of Compound **3**.

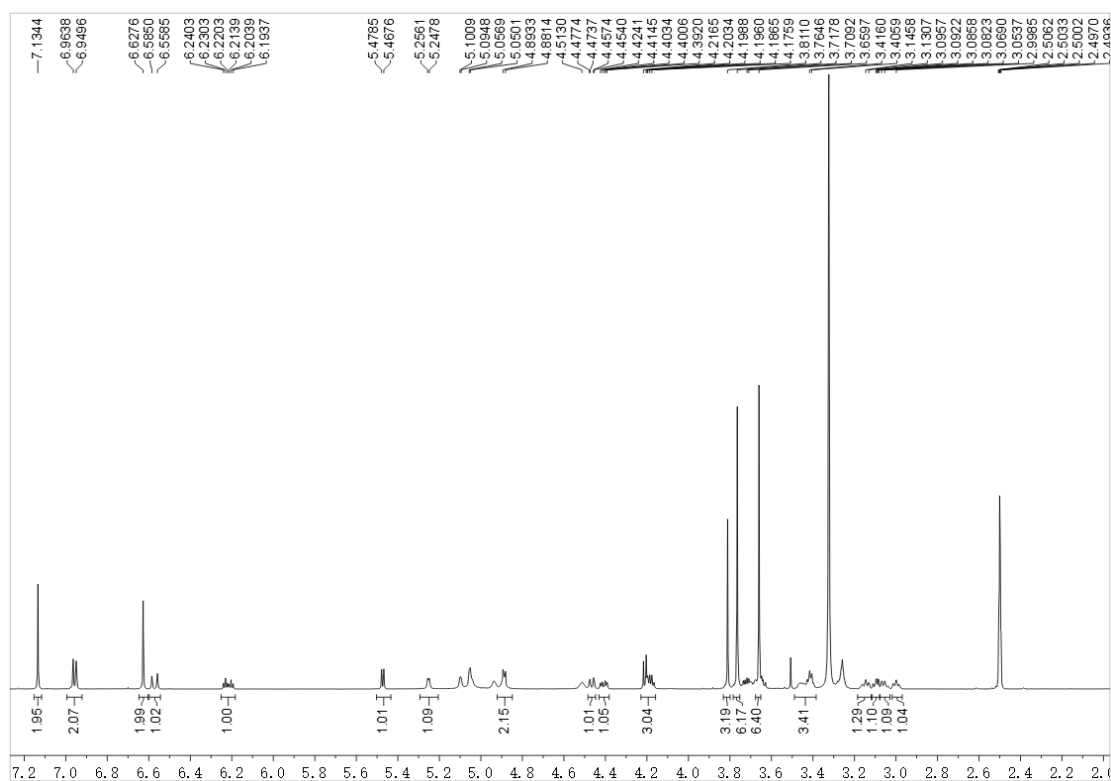

**Figure S22.** The <sup>1</sup>H NMR Spectrum of Compound **3** in DMSO-*d*<sub>6</sub>.

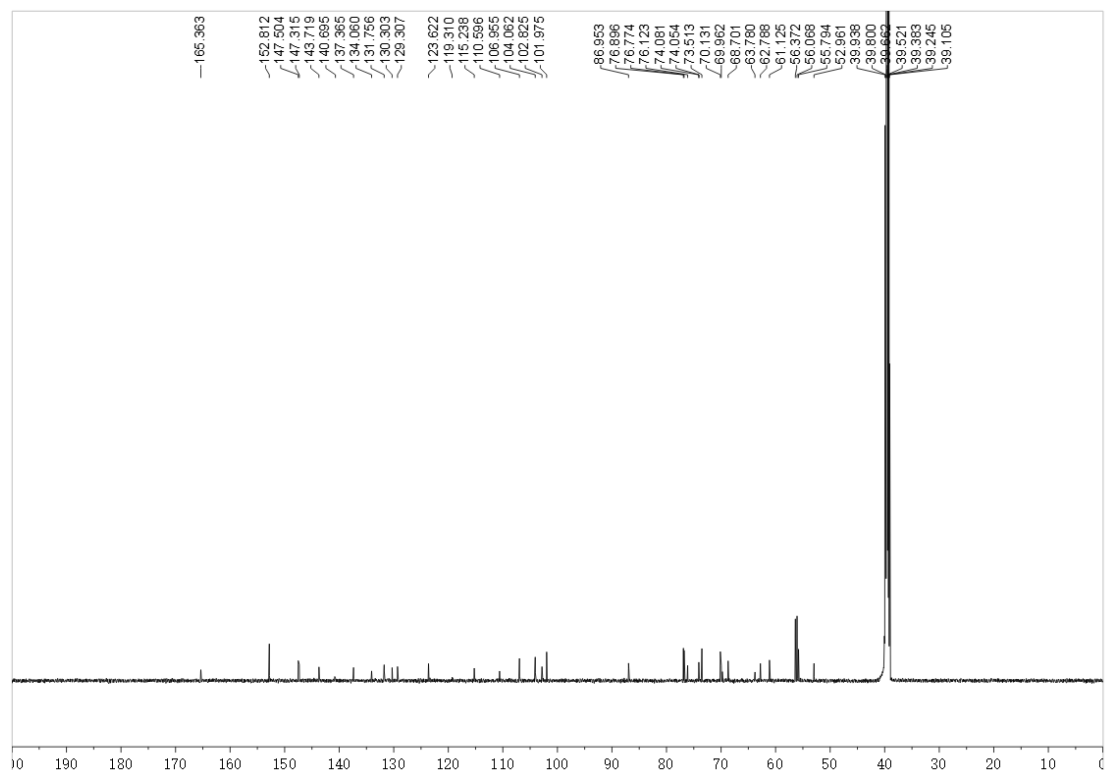

**Figure S23.** The  $^{13}\text{C}$  NMR Spectrum of Compound **3** in  $\text{DMSO}-d_6$ .

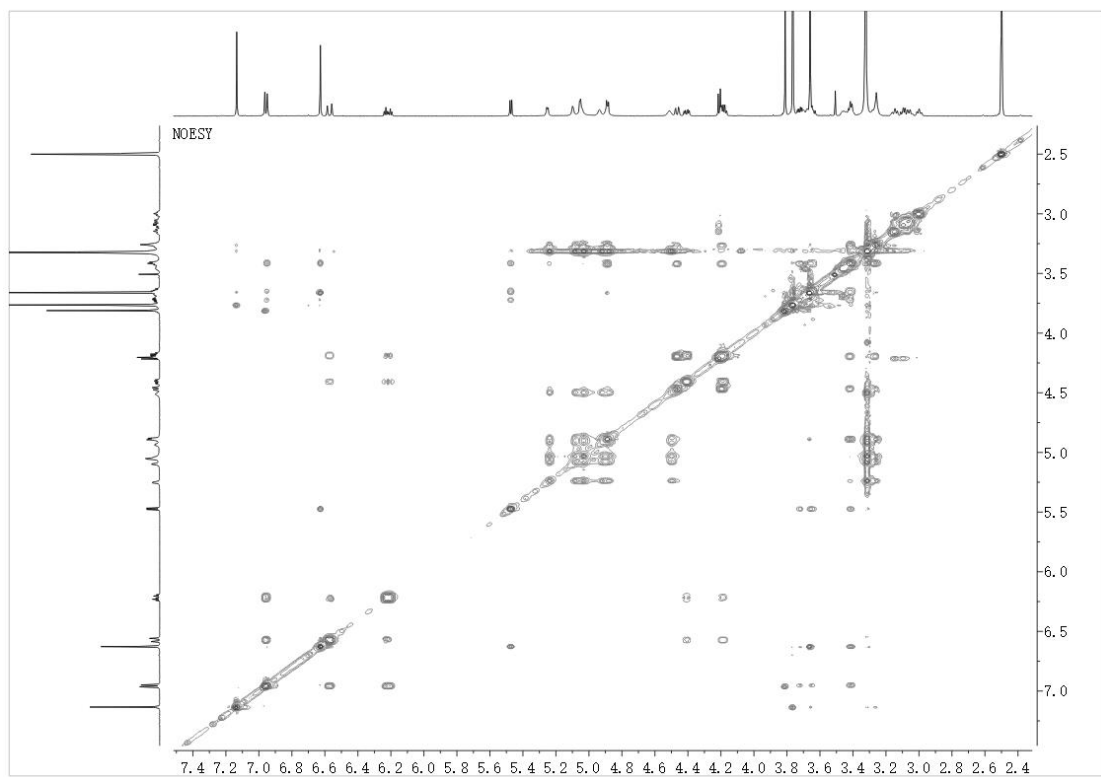

**Figure S24.** The NOESY Spectrum of Compound **3** in  $\text{DMSO}-d_6$ .



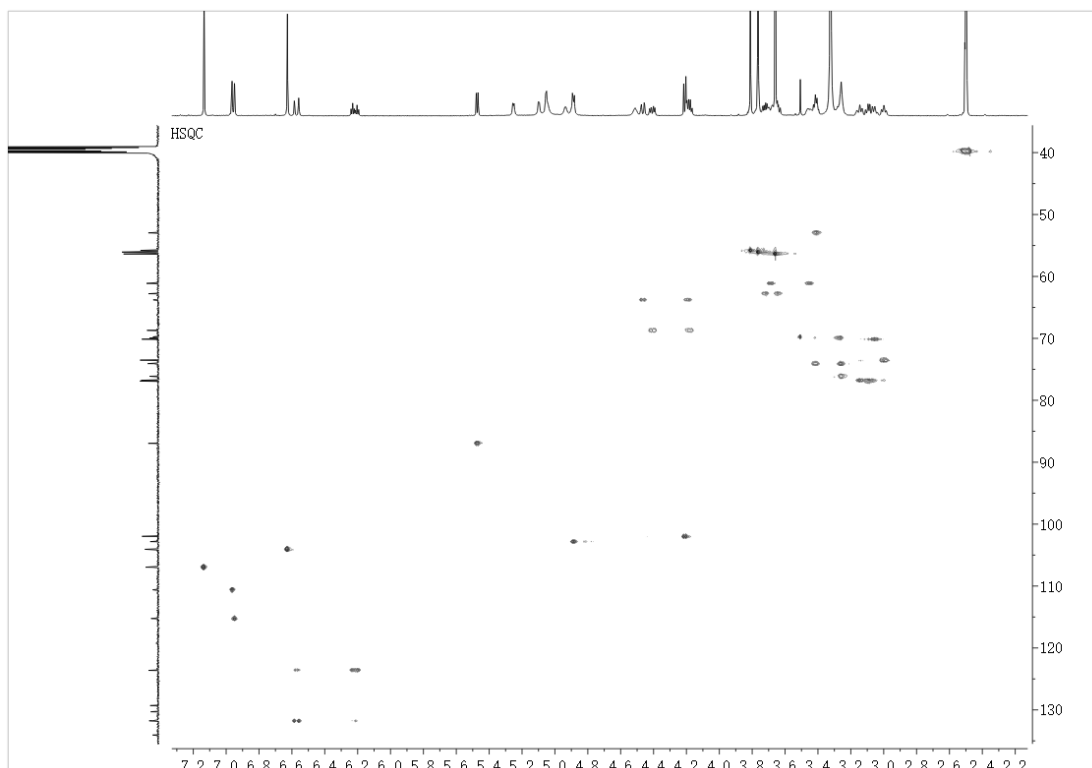

**Figure S25.** The HSQC Spectrum of Compound **3** in DMSO- $d_6$ .

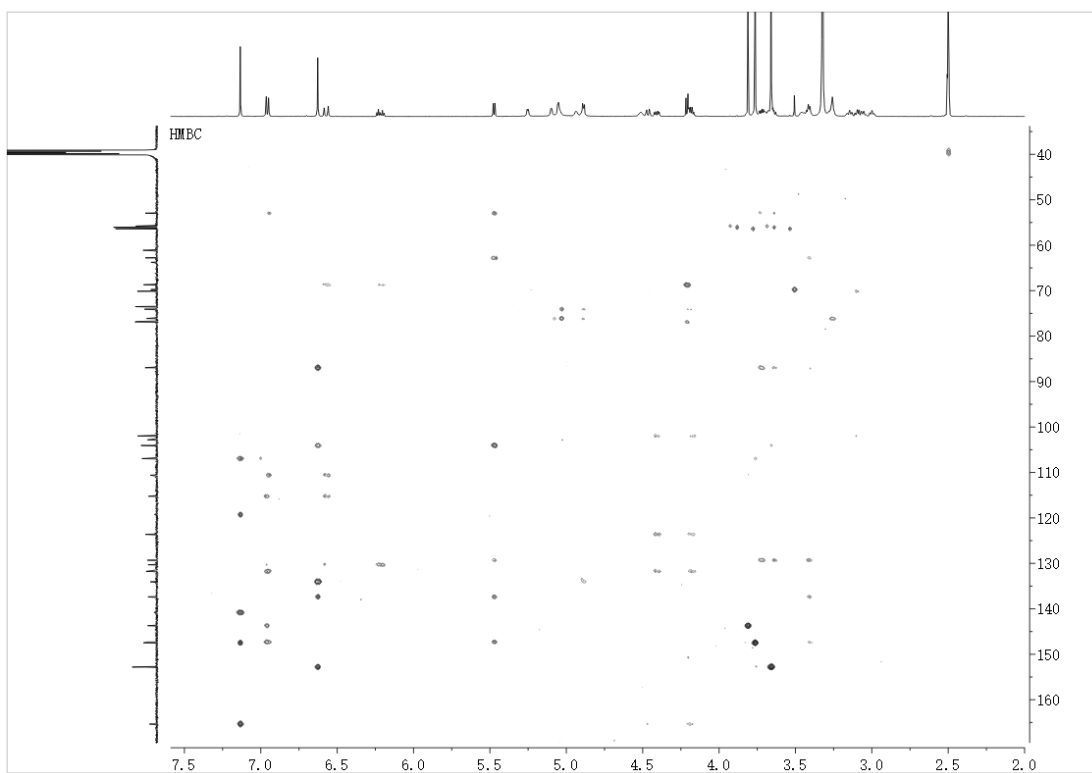

**Figure S26.** The HMBC Spectrum of Compound **3** in DMSO- $d_6$ .

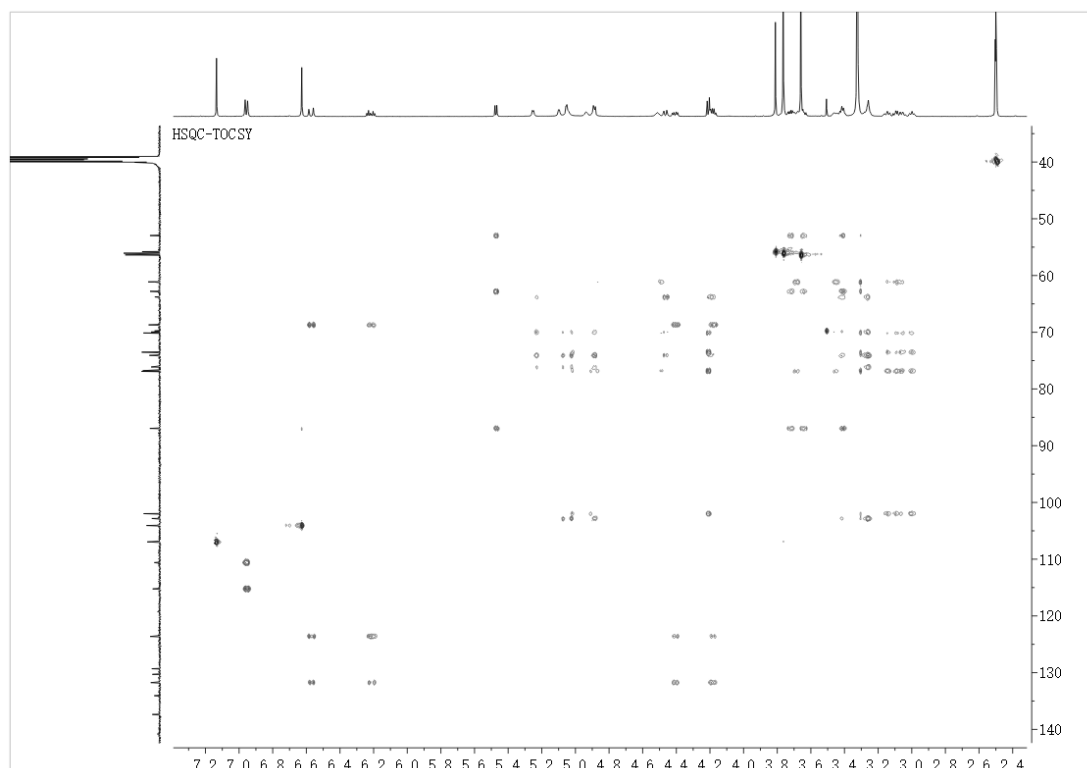

**Figure S27.** The HSQC-TOCSY Spectrum of Compound **3** in DMSO- $d_6$ .

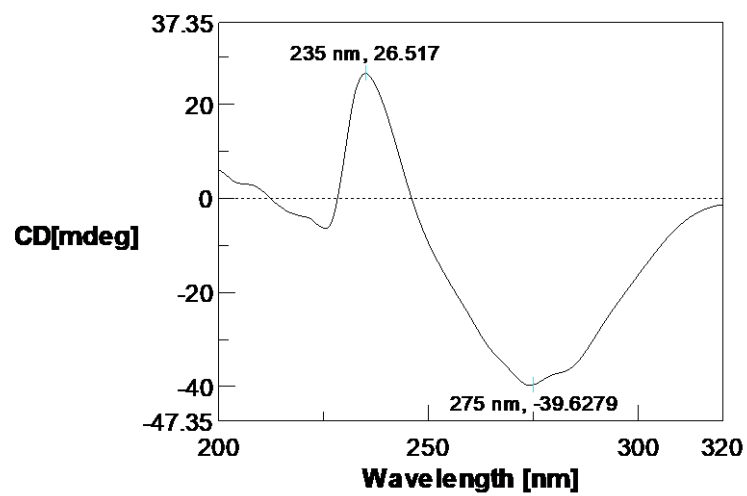

**Figure S28.** The CD Spectrum of Compound **3** in MeOH.

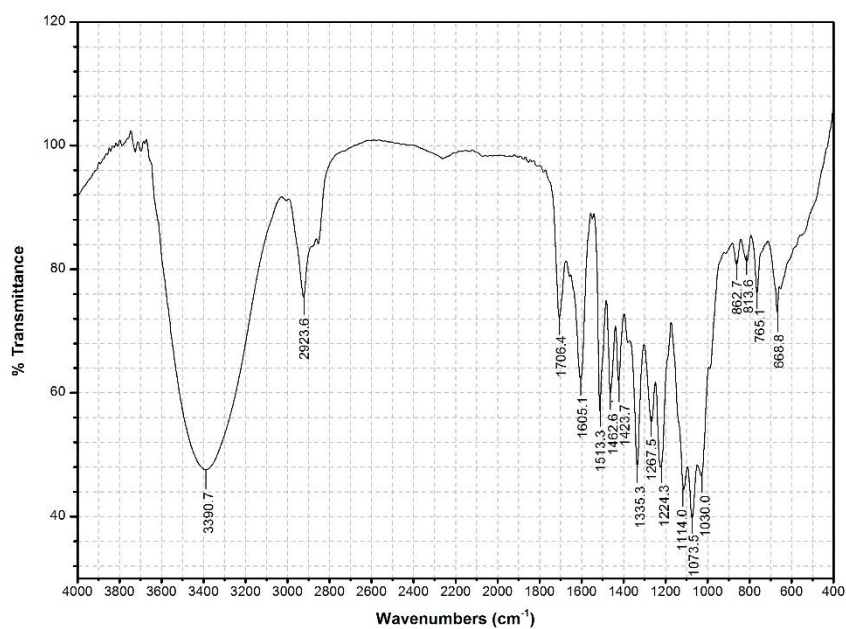

**Figure S29.** The IR Spectrum of Compound **4**.

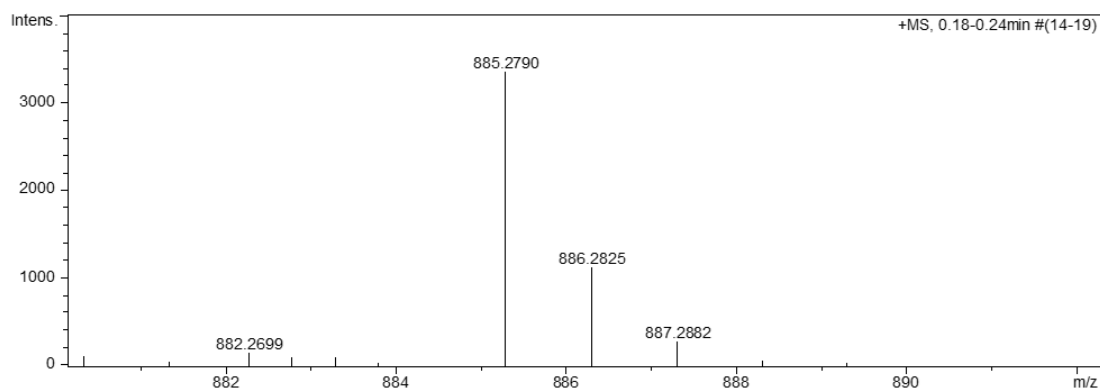

| Meas. m/z | # | Formula                                           | Score | m/z      | err [mDa] | err [ppm] | mSigma | rdB  | e <sup>-</sup> Conf | N-Rule |
|-----------|---|---------------------------------------------------|-------|----------|-----------|-----------|--------|------|---------------------|--------|
| 885.2790  | 1 | C <sub>41</sub> H <sub>50</sub> NaO <sub>20</sub> | 100   | 885.2788 | -0.2      | -0.2      | 62.4   | 16.5 | even                | ok     |

**Figure S30.** The (+)-HRESIMS Spectrum of Compound **4**.

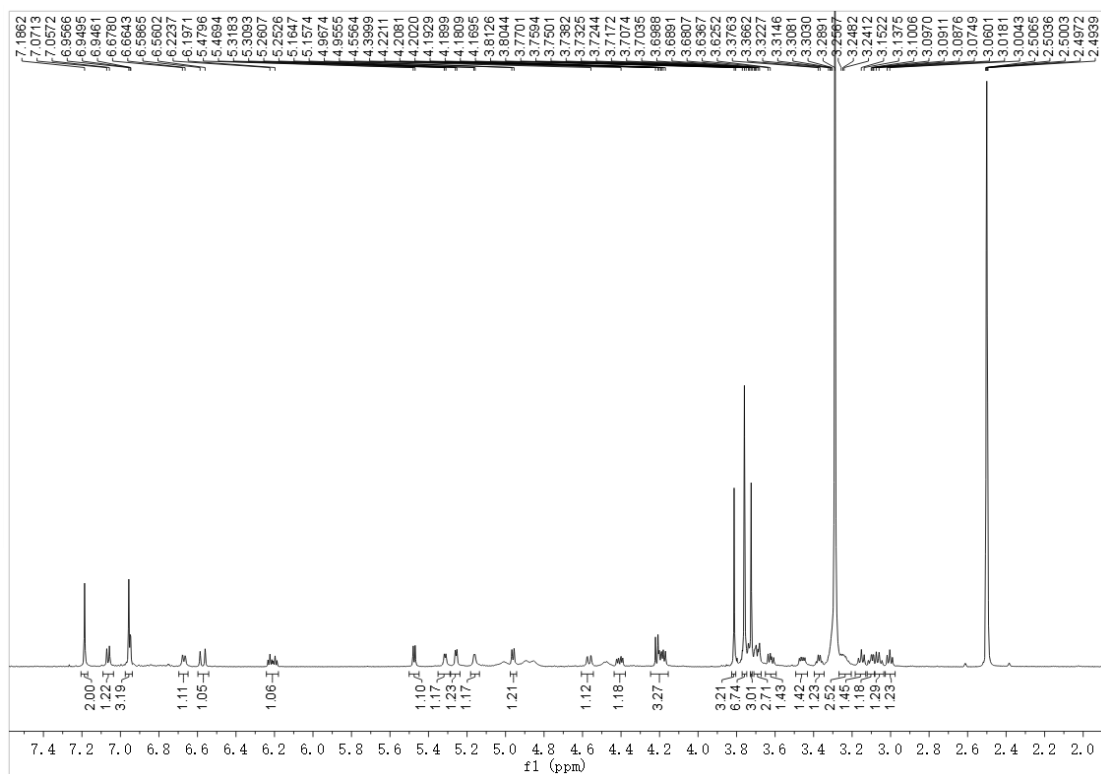

**Figure S31.** The <sup>1</sup>H NMR Spectrum of Compound 4 in DMSO-*d*<sub>6</sub>.

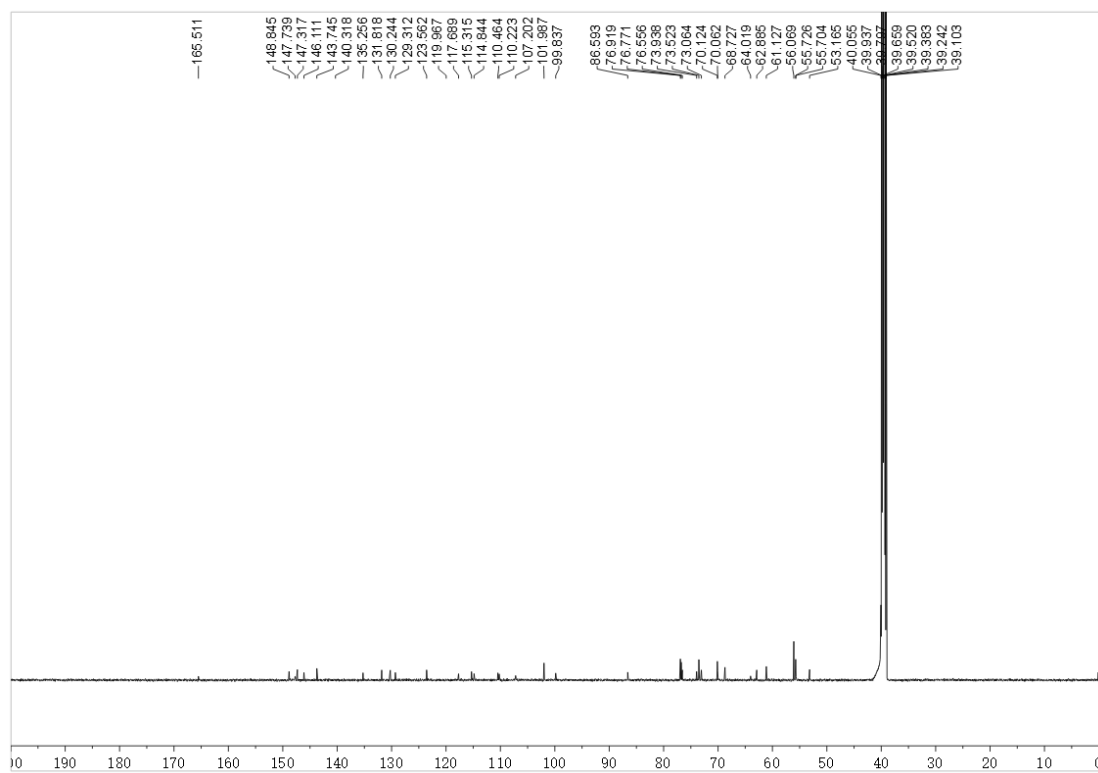

**Figure S32.** The <sup>13</sup>C NMR Spectrum of Compound 4 in DMSO-*d*<sub>6</sub>.

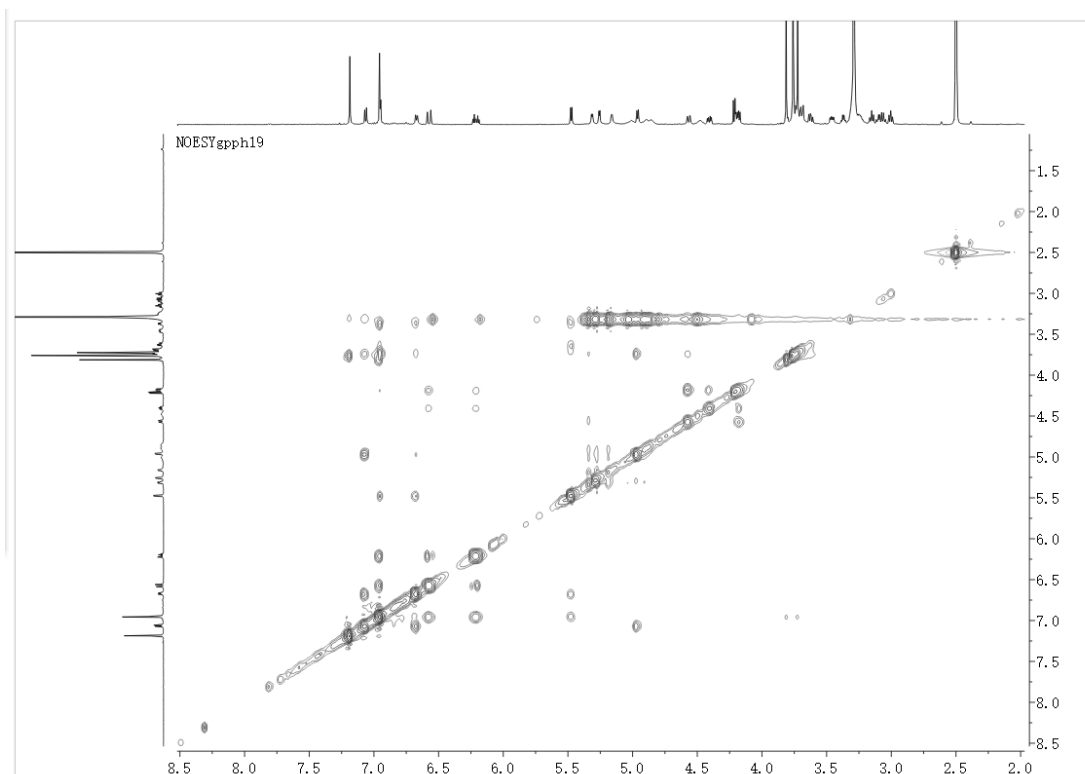

**Figure S33.** The NOESY Spectrum of Compound **4** in DMSO- $d_6$ .

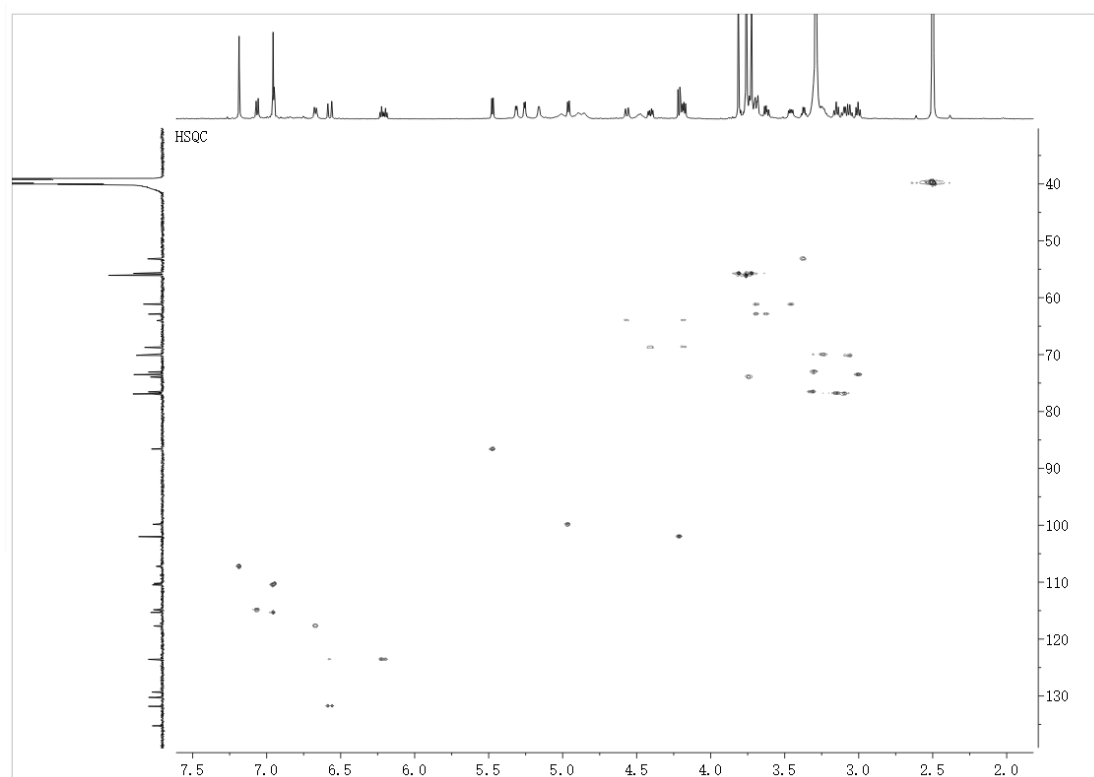

**Figure S34.** The HSQC Spectrum of Compound **4** in DMSO- $d_6$ .

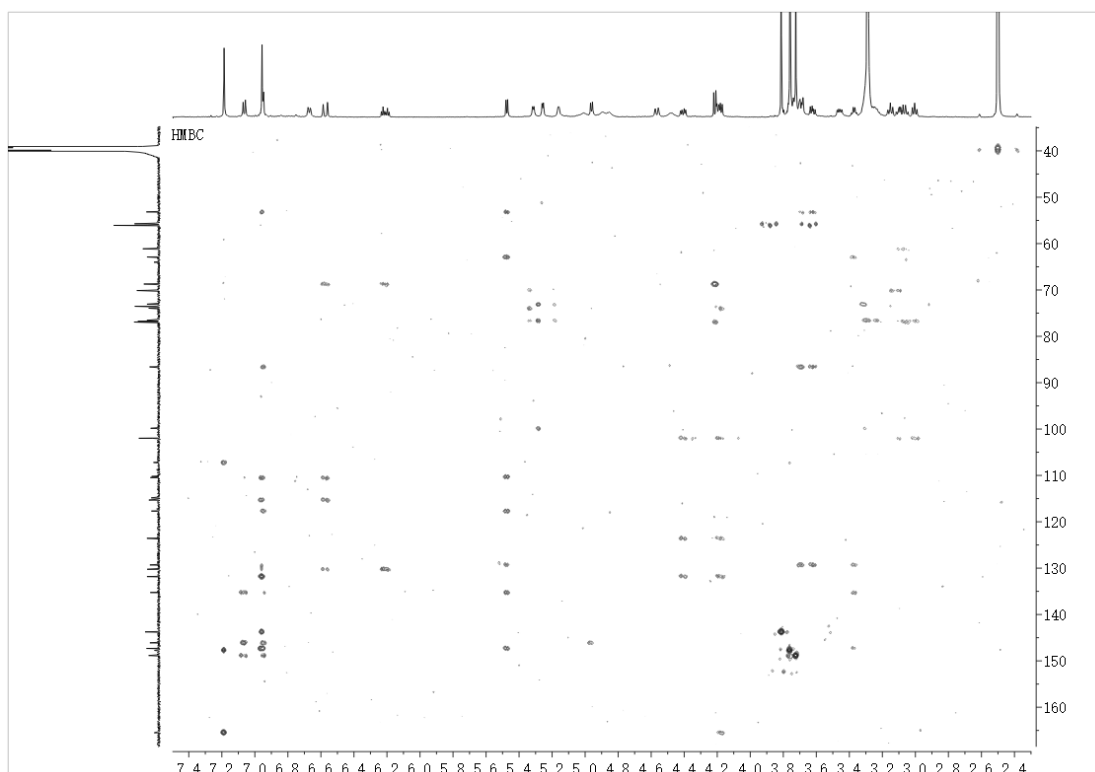

**Figure S35.** The HMBC Spectrum of Compound **4** in DMSO- $d_6$ .

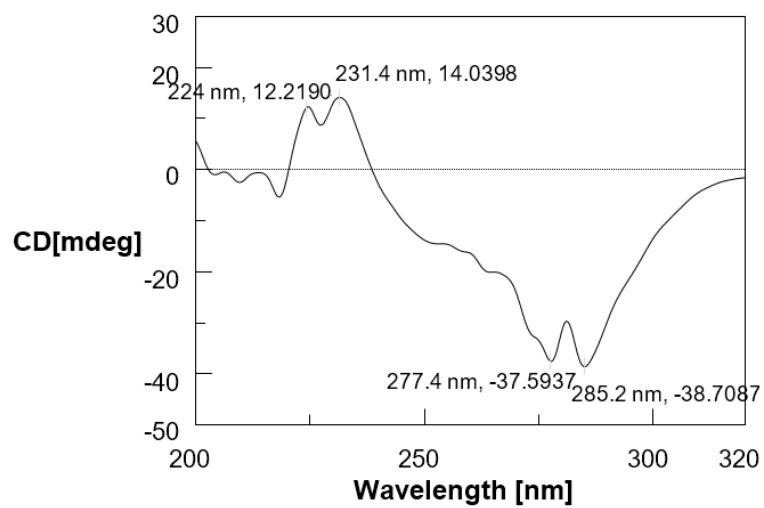

**Figure S36.** The CD Spectrum of Compound **4** in MeOH.

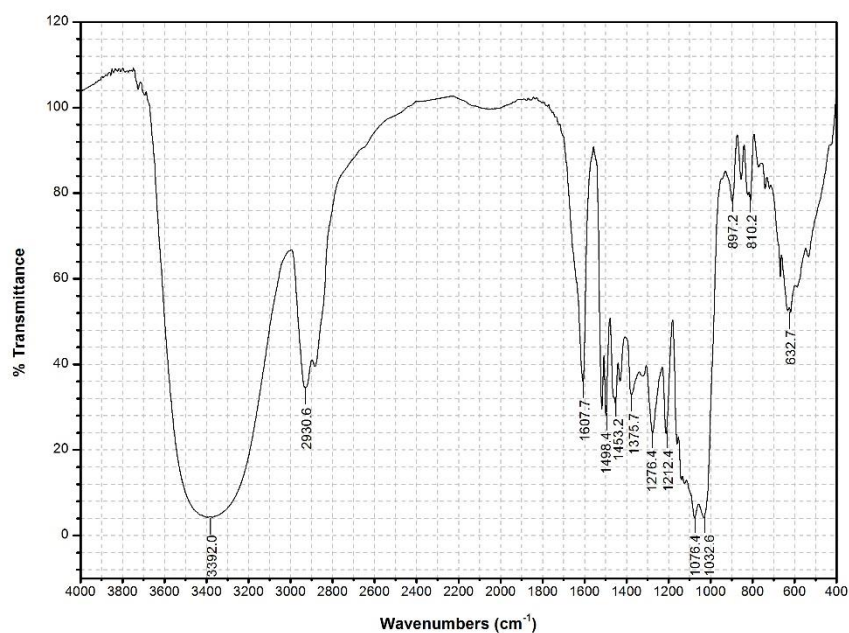

**Figure S37.** The IR Spectrum of Compound **5**.

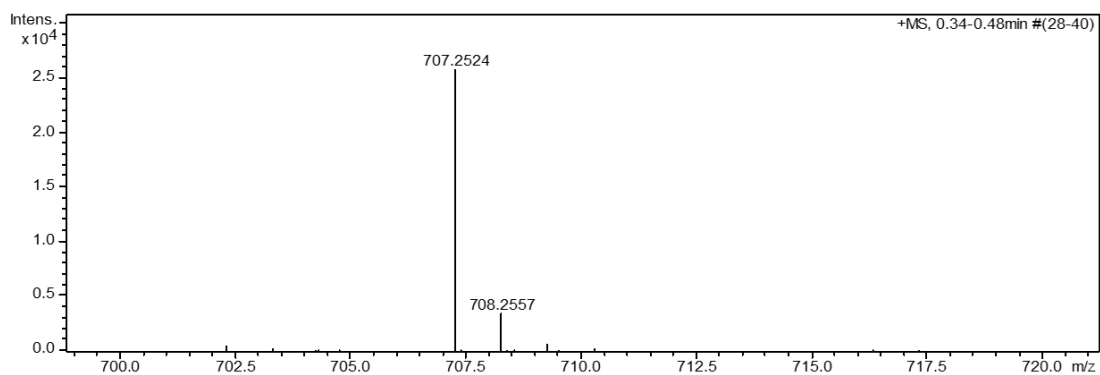

| Meas. m/z | # | Formula                                           | Score | m/z      | err [mDa] | err [ppm] | mSigma | rdb  | e <sup>-</sup> Conf | N-Rule |
|-----------|---|---------------------------------------------------|-------|----------|-----------|-----------|--------|------|---------------------|--------|
| 707.2524  | 1 | C <sub>32</sub> H <sub>44</sub> NaO <sub>16</sub> | 100   | 707.2522 | -0.2      | -0.3      | 119.5  | 10.5 | even                | ok     |

**Figure S38.** The (+)-HRESIMS Spectrum of Compound **5**.

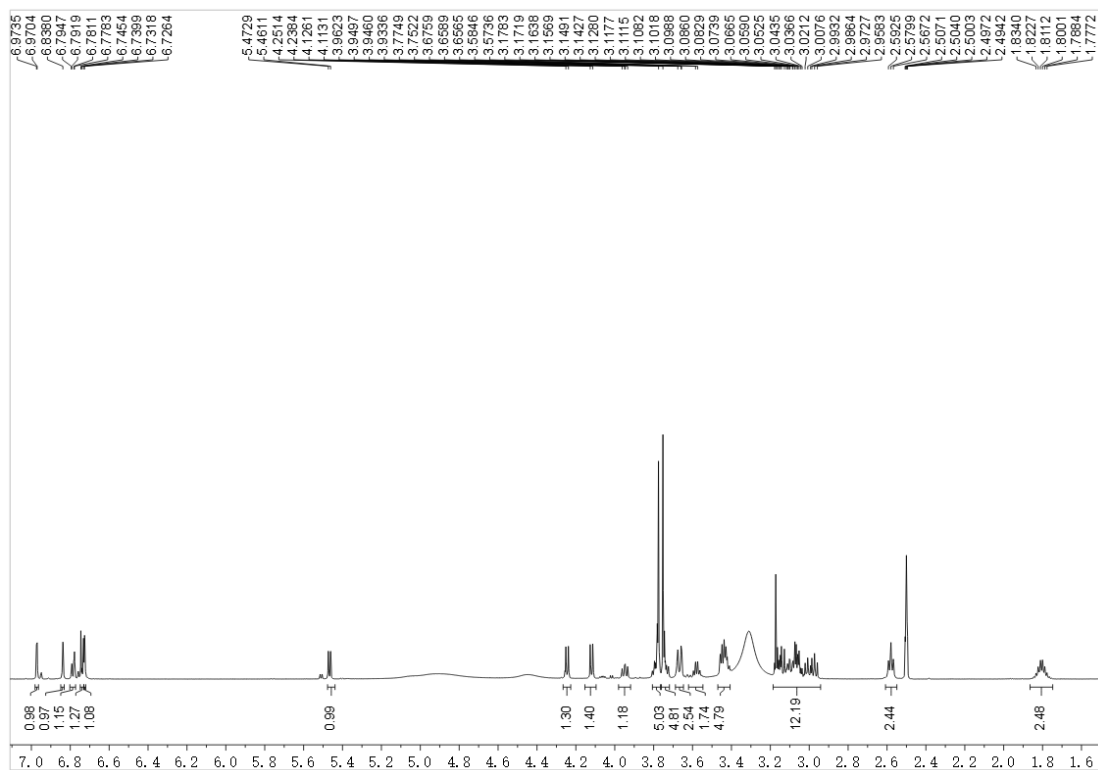

**Figure S39.** The  $^1\text{H}$  NMR Spectrum of Compound **5** in  $\text{DMSO}-d_6$ .

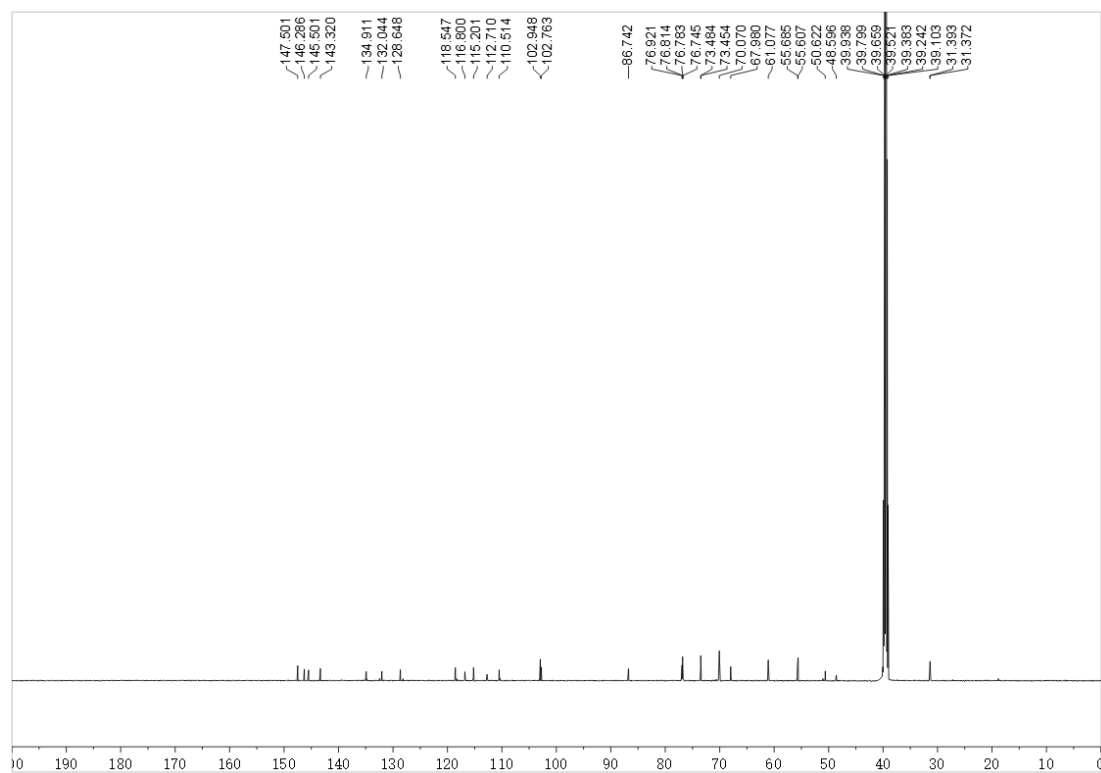

**Figure S40.** The  $^{13}\text{C}$  NMR Spectrum of Compound **5** in  $\text{DMSO}-d_6$ .



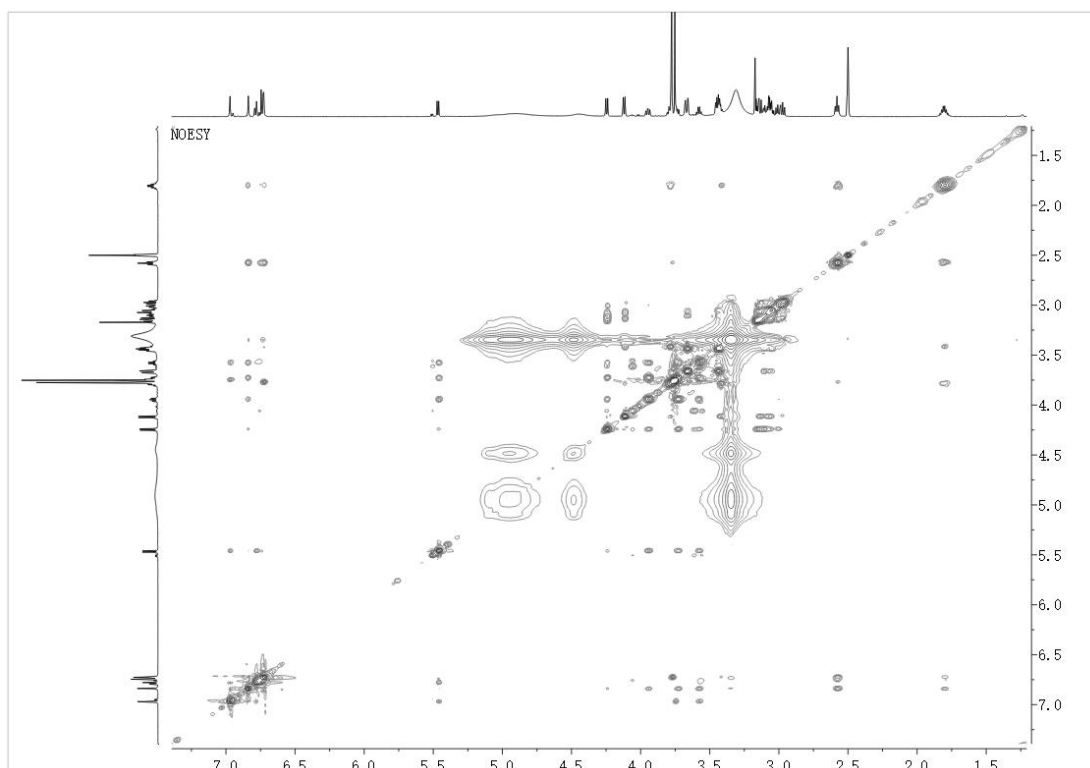

**Figure S41.** The NOESY Spectrum of Compound **5** in DMSO- $d_6$ .

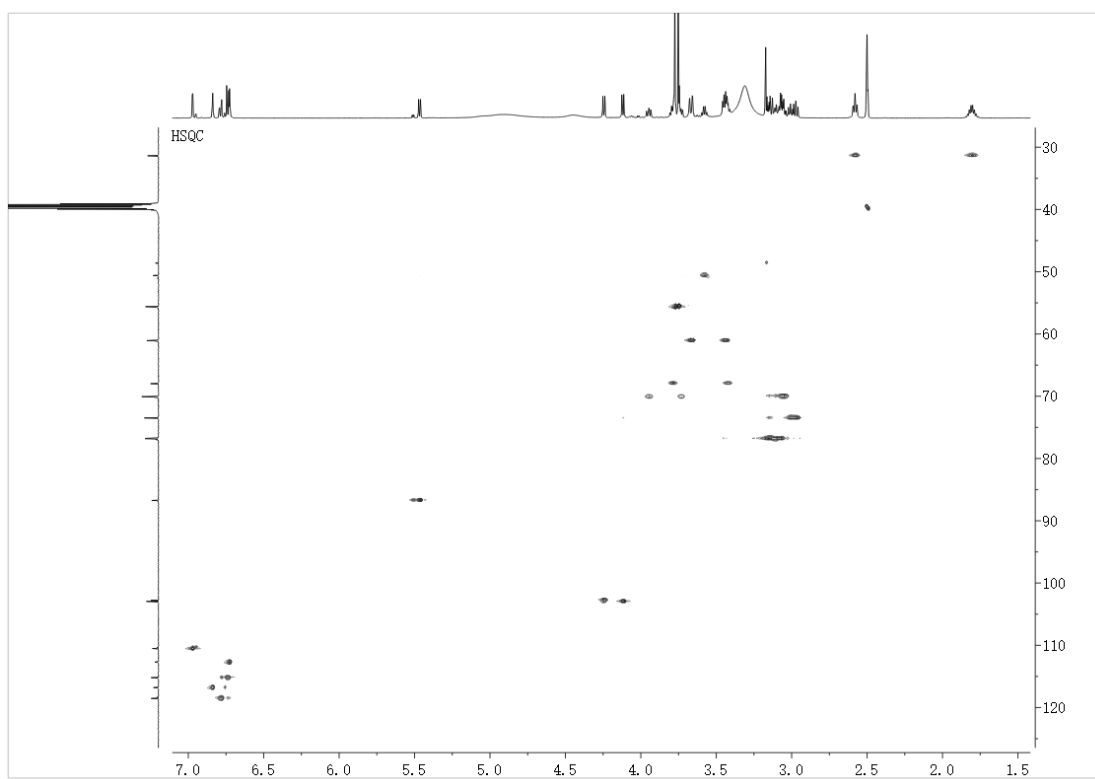

**Figure S42.** The HSQC Spectrum of Compound **5** in DMSO- $d_6$ .

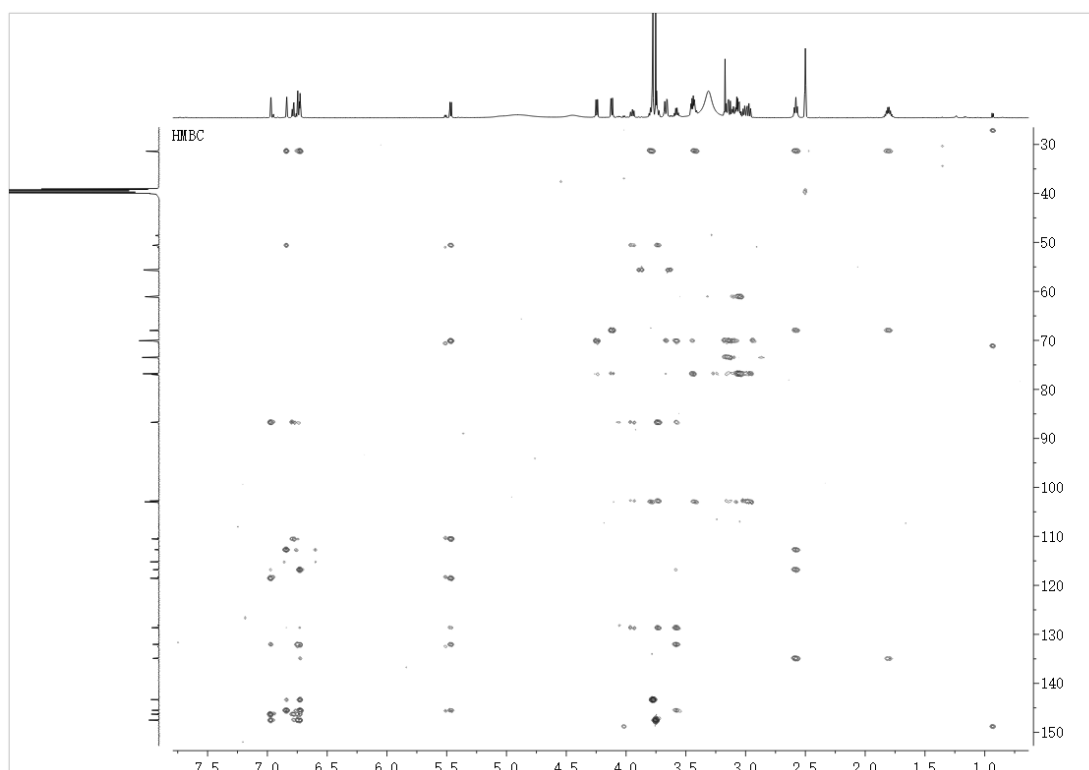

**Figure S43.** The HMBC Spectrum of Compound **5** in DMSO- $d_6$ .

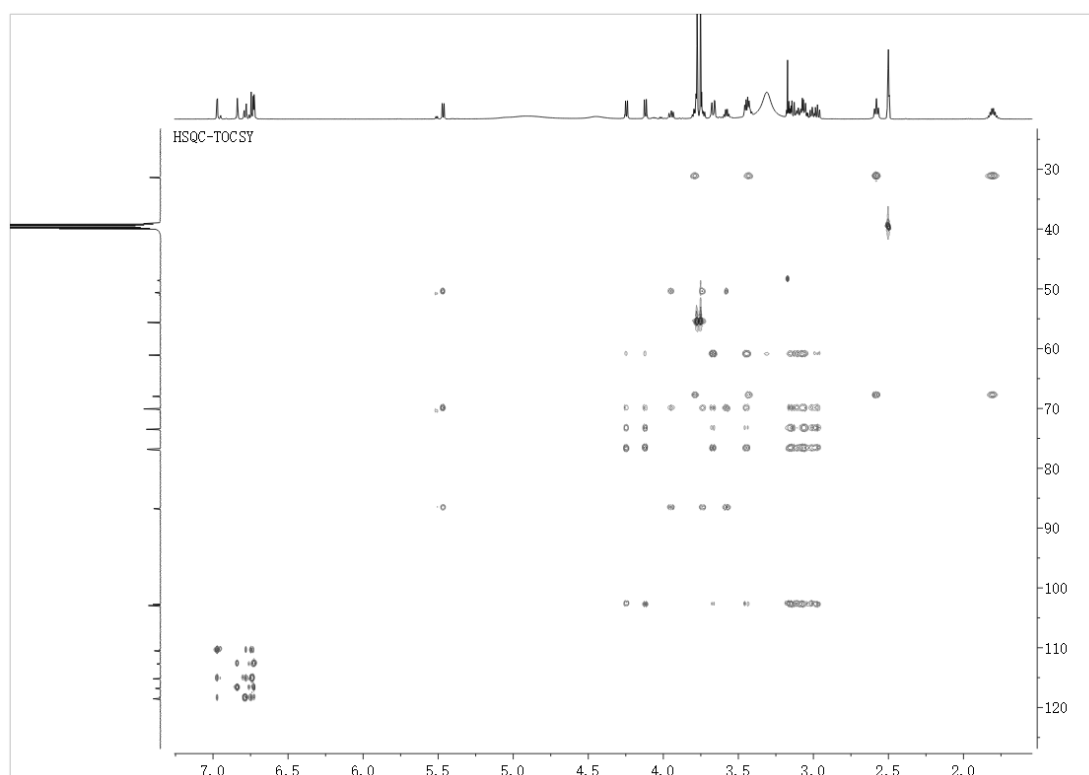

**Figure S44.** The HSQC-TOCSY Spectrum of Compound **5** in DMSO- $d_6$ .

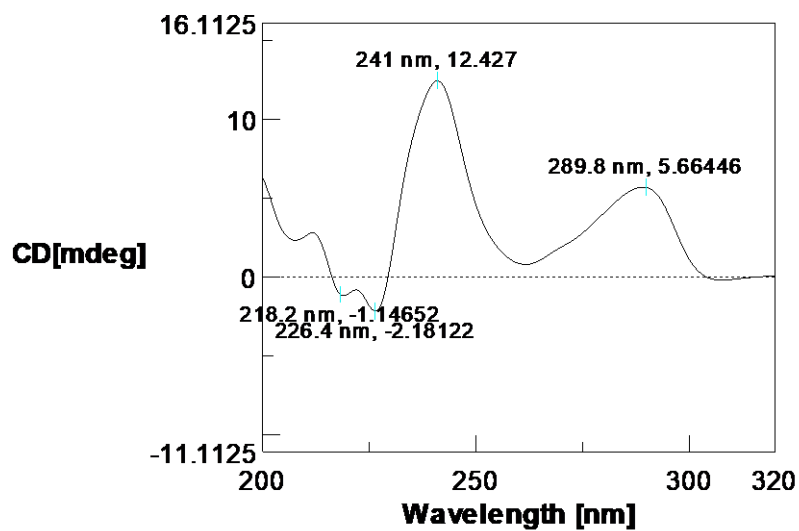

**Figure S45.** The CD Spectrum of Compound **5** in MeOH.

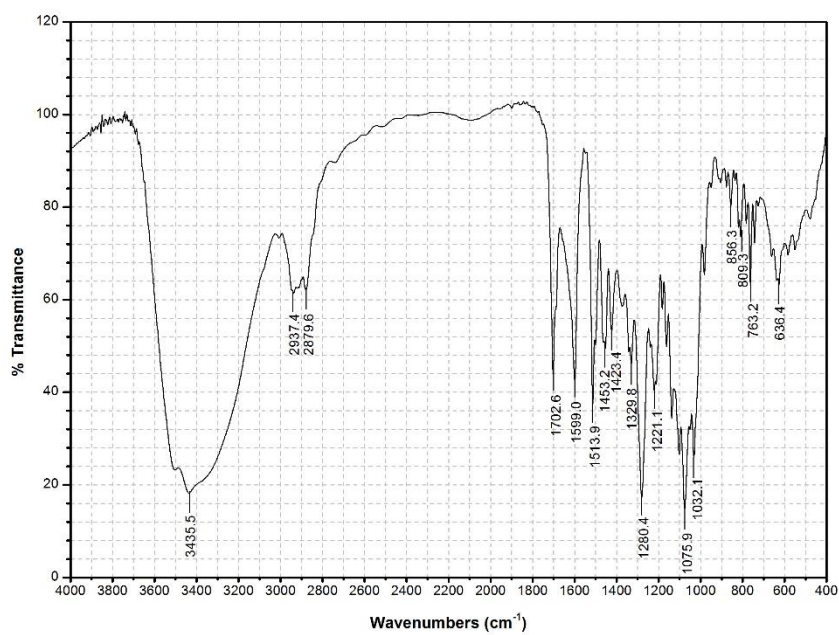

**Figure S46.** The IR Spectrum of Compound **6**.

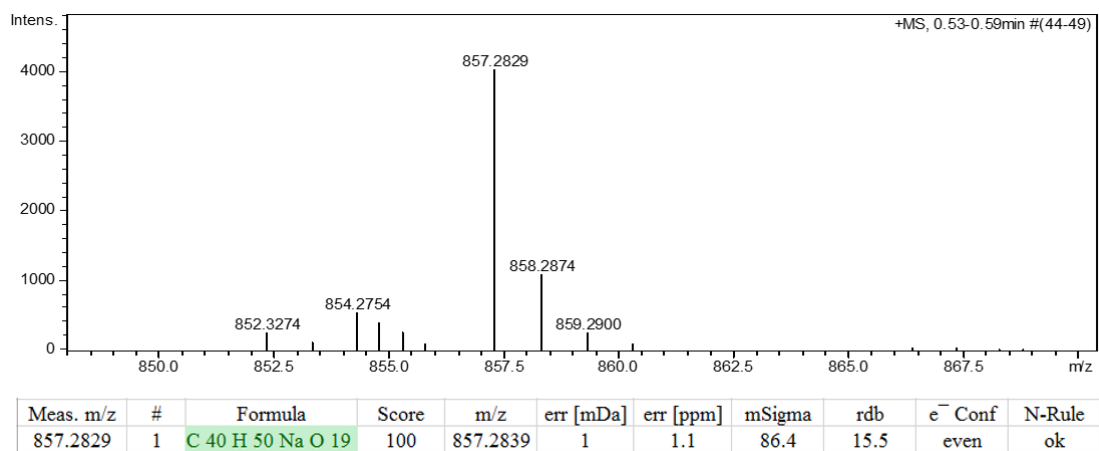

**Figure S47.** The (+)-HRESIMS Spectrum of Compound **6**.

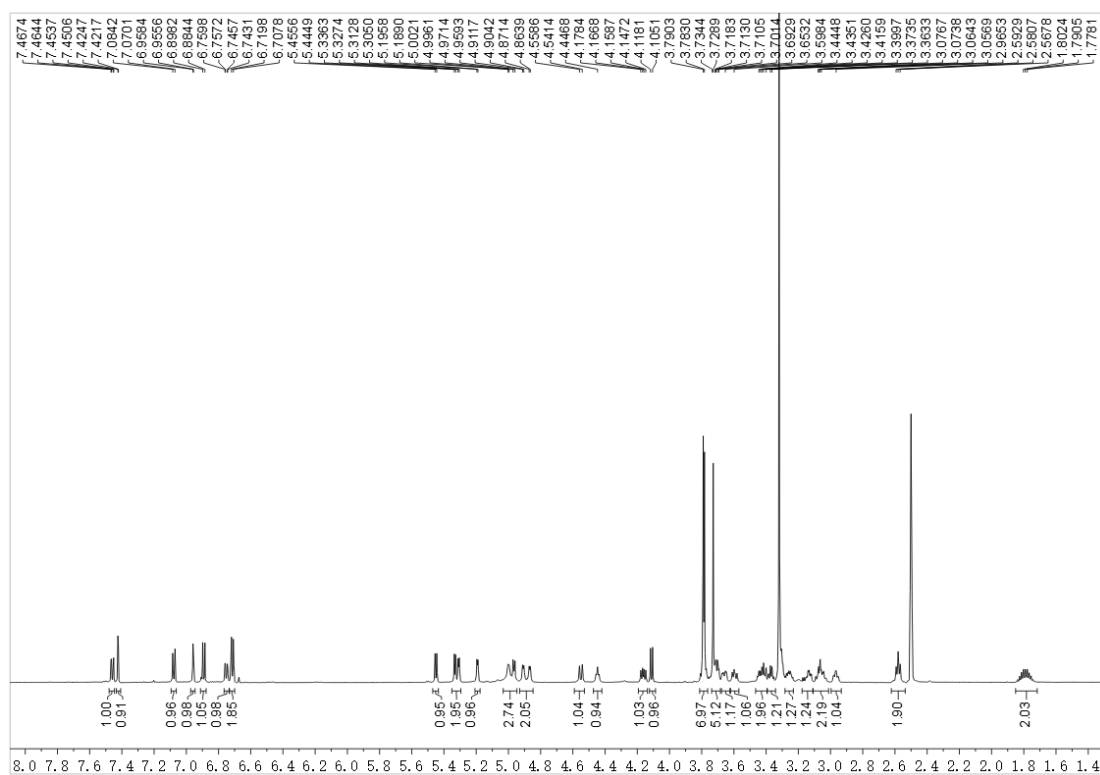

**Figure S48.** The <sup>1</sup>H NMR Spectrum of Compound **6** in DMSO-*d*<sub>6</sub>.

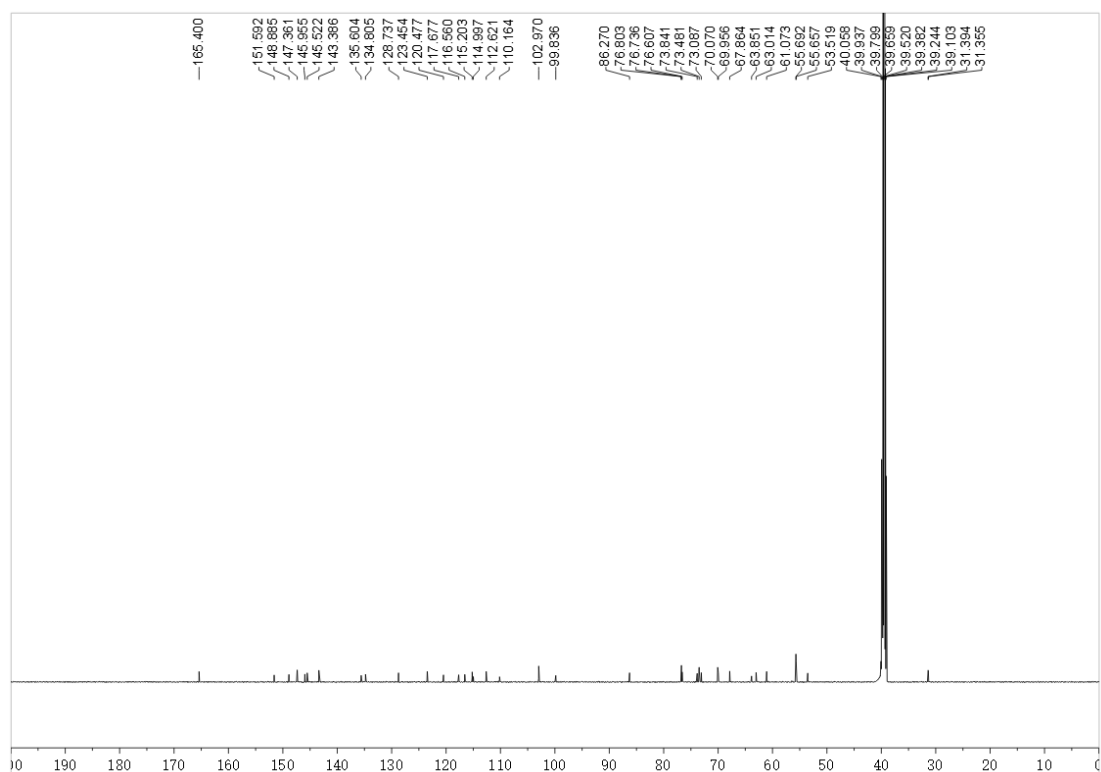

**Figure S49.** The  $^{13}\text{C}$  NMR Spectrum of Compound **6** in  $\text{DMSO}-d_6$ .

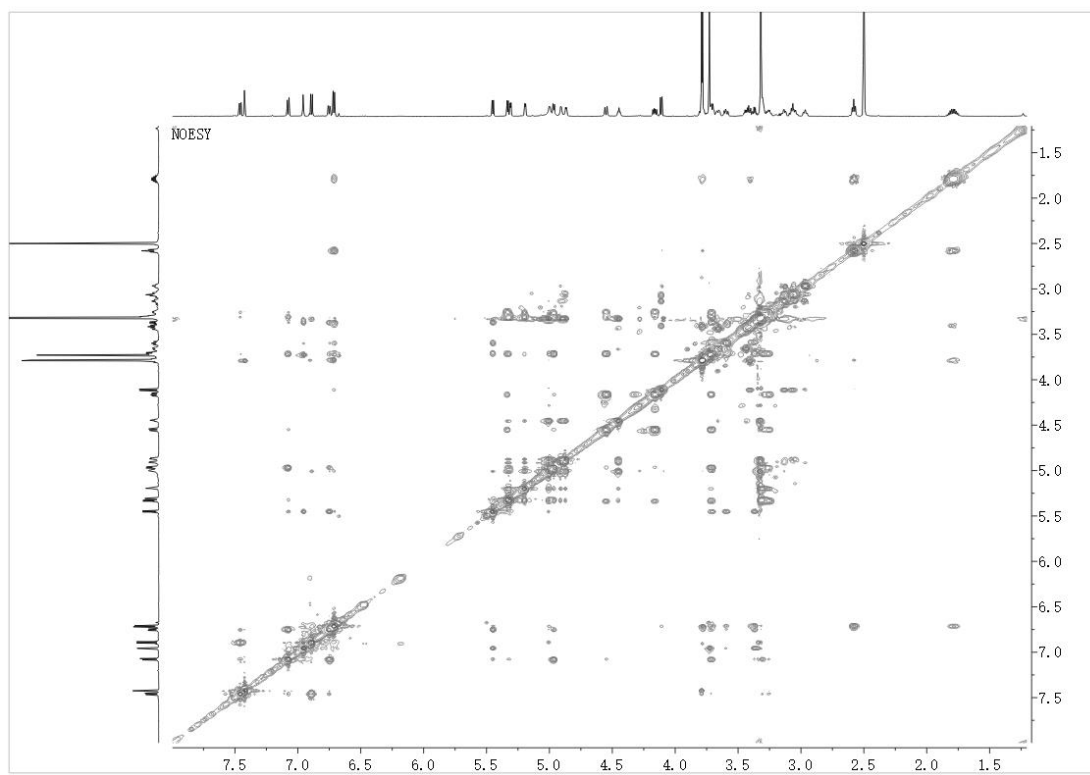

**Figure S50.** The NOESY Spectrum of Compound **6** in  $\text{DMSO}-d_6$ .

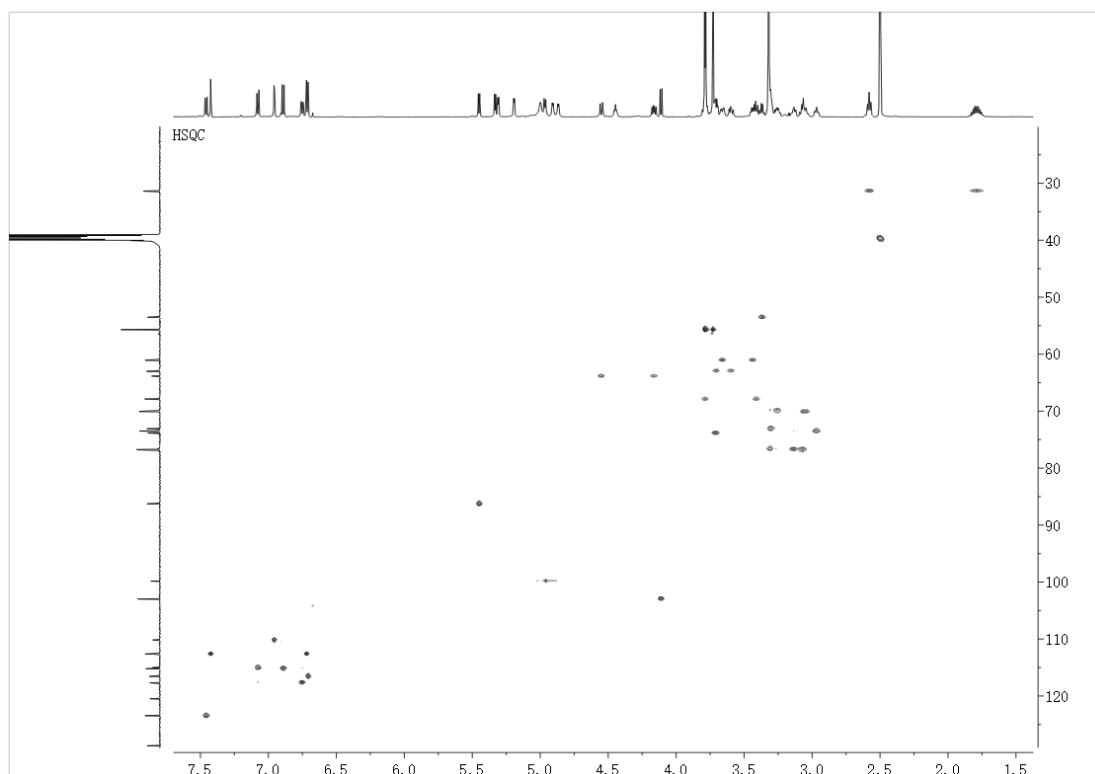

**Figure S51.** The HSQC Spectrum of Compound **6** in DMSO-*d*<sub>6</sub>.

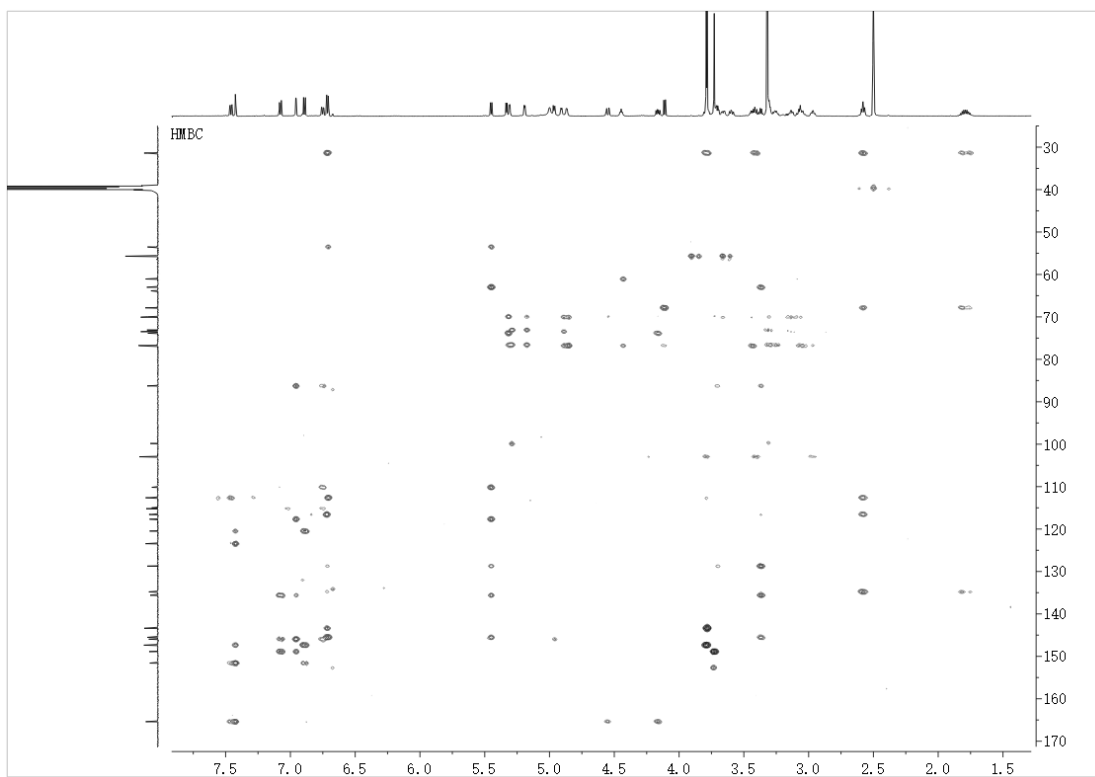

**Figure S52.** The HMBC Spectrum of Compound **6** in DMSO-*d*<sub>6</sub>.

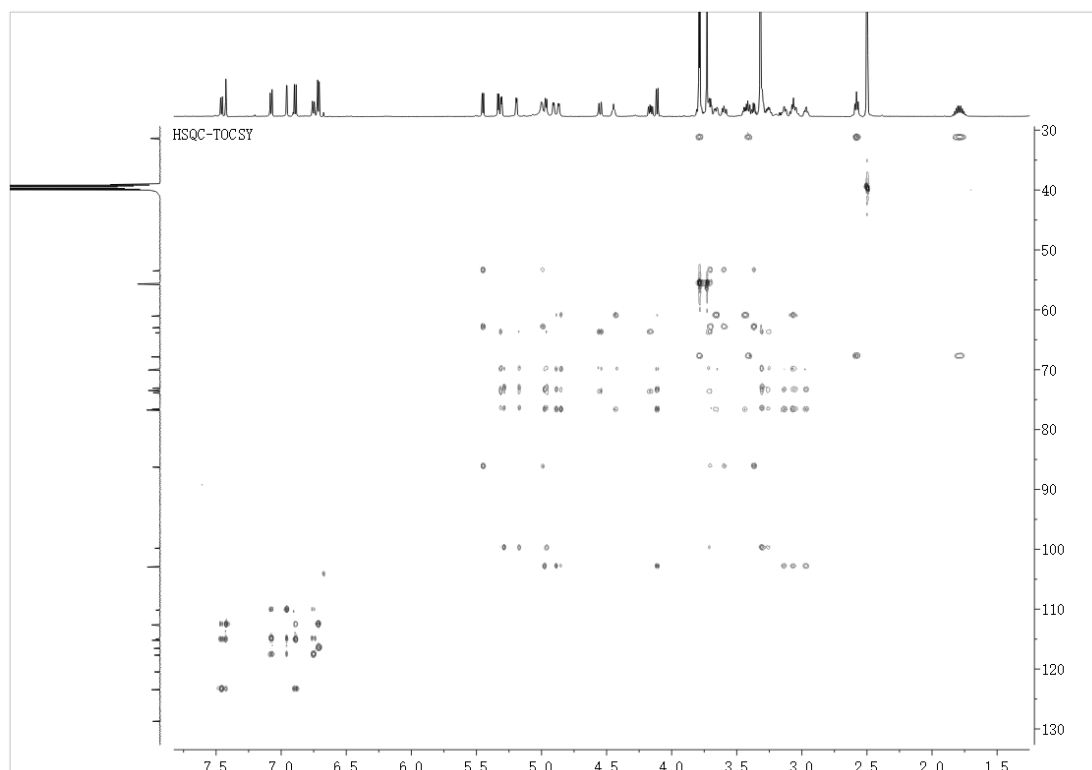

**Figure S53.** The HSQC-TOCSY Spectrum of Compound **6** in DMSO- $d_6$ .

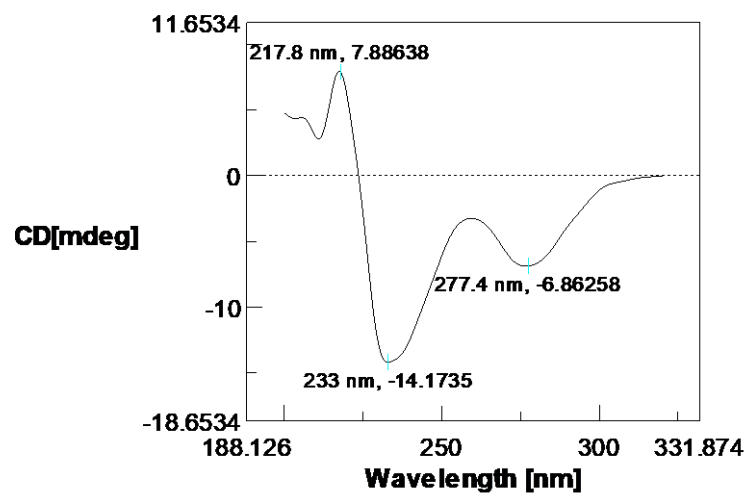

**Figure S54.** The CD Spectrum of Compound **6** in MeOH.

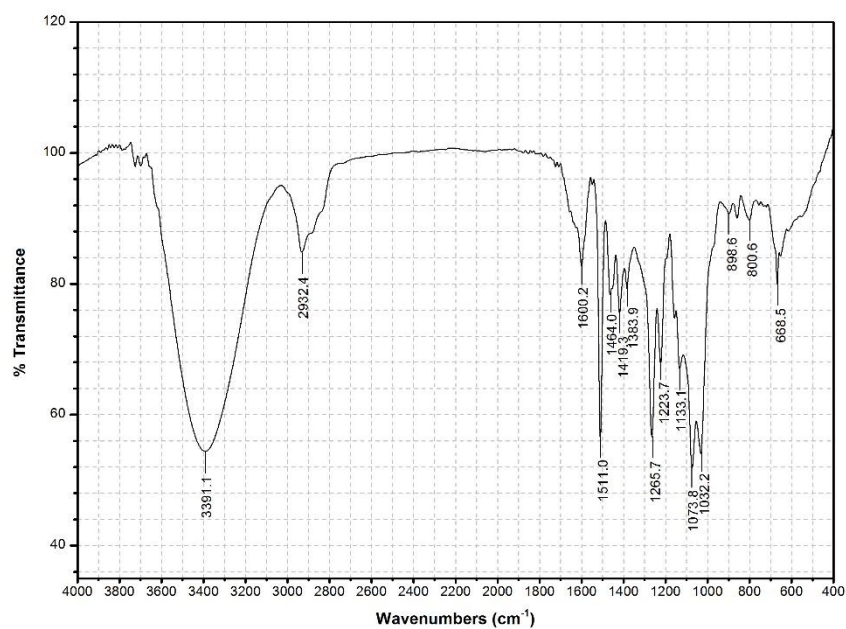

**Figure S55.** The IR Spectrum of Compound **7**.

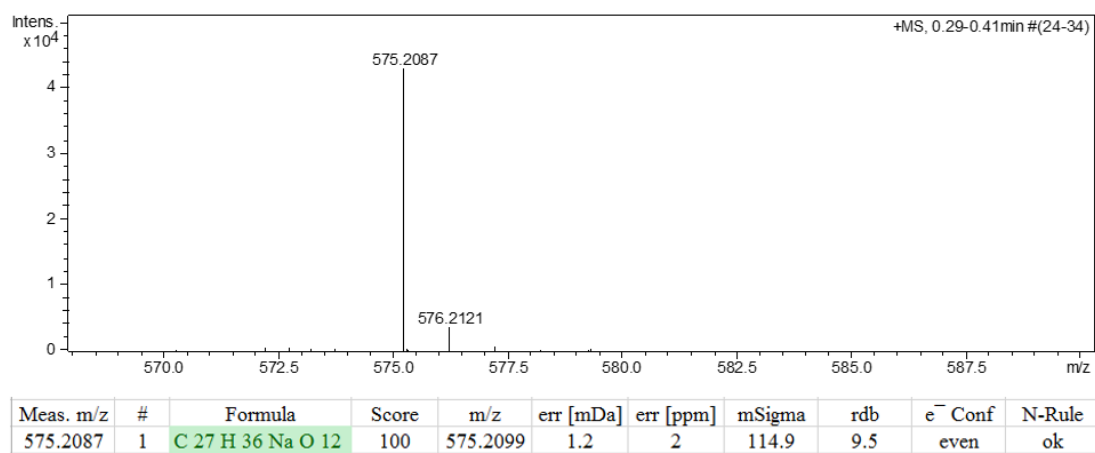

**Figure S56.** The (+)-HRESIMS Spectrum of Compound **7**.



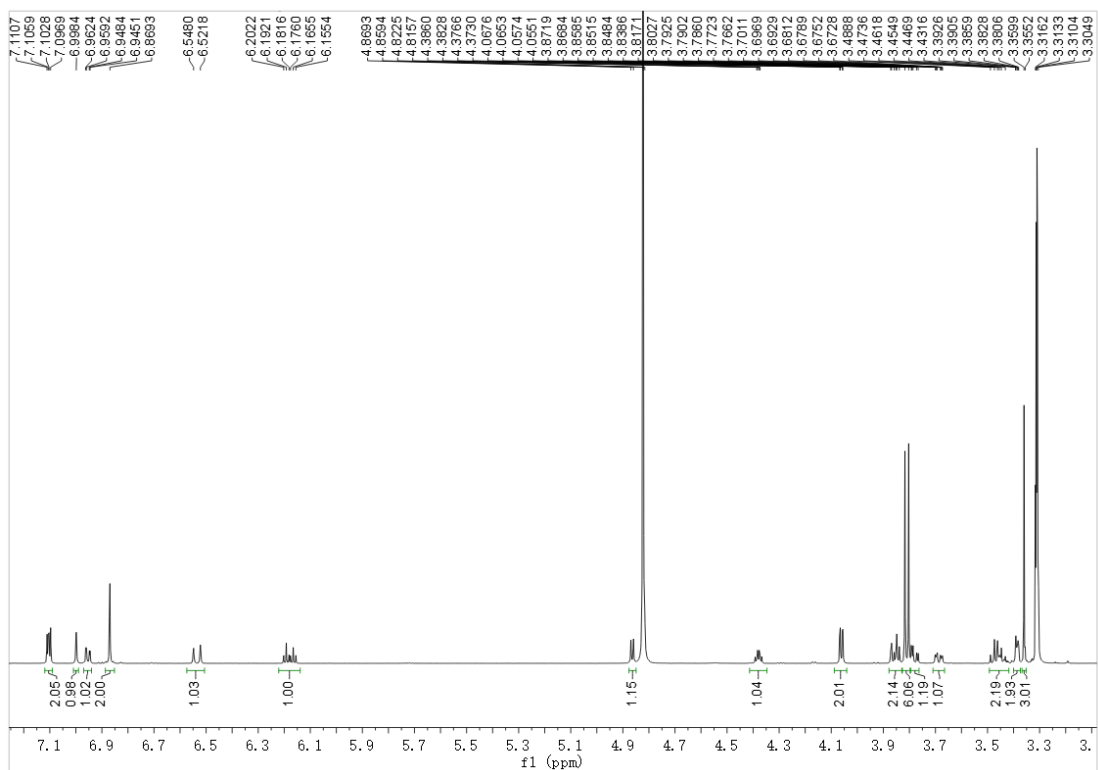

**Figure S57.** The  $^1\text{H}$  NMR Spectrum of Compound **7** in  $\text{CD}_3\text{OD}$ .

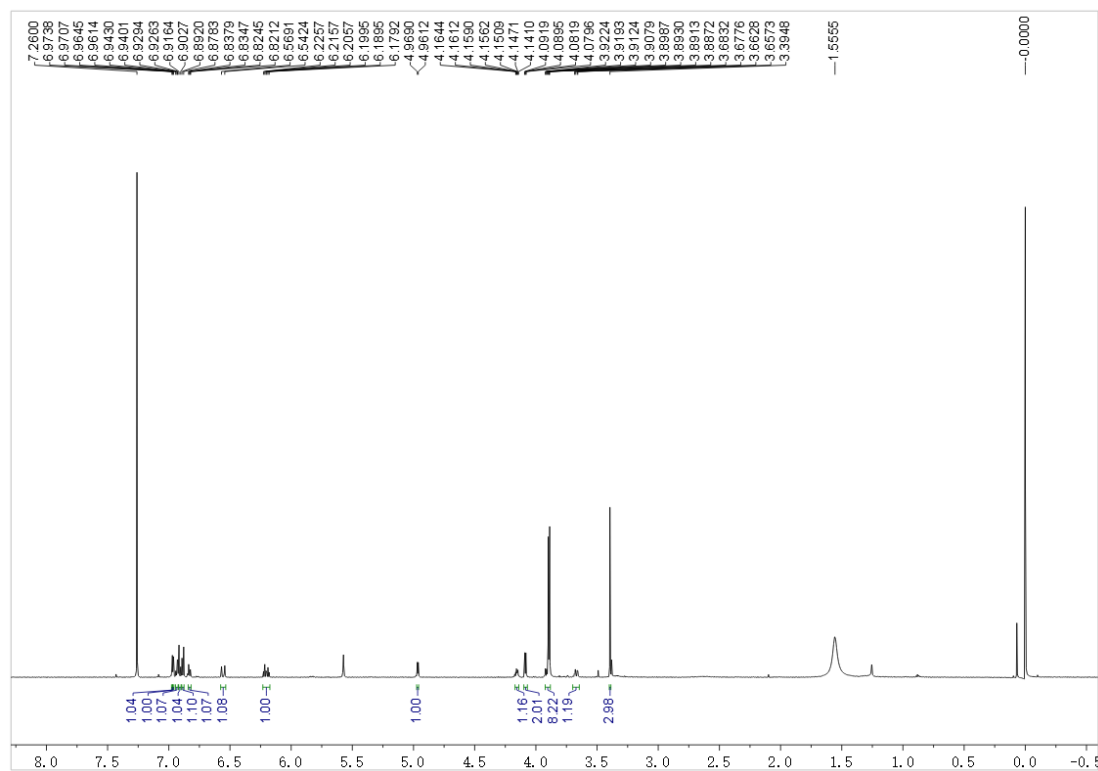

**Figure S58.** The  $^1\text{H}$  NMR Spectrum of Compound **7a** in  $\text{CDCl}_3$ .

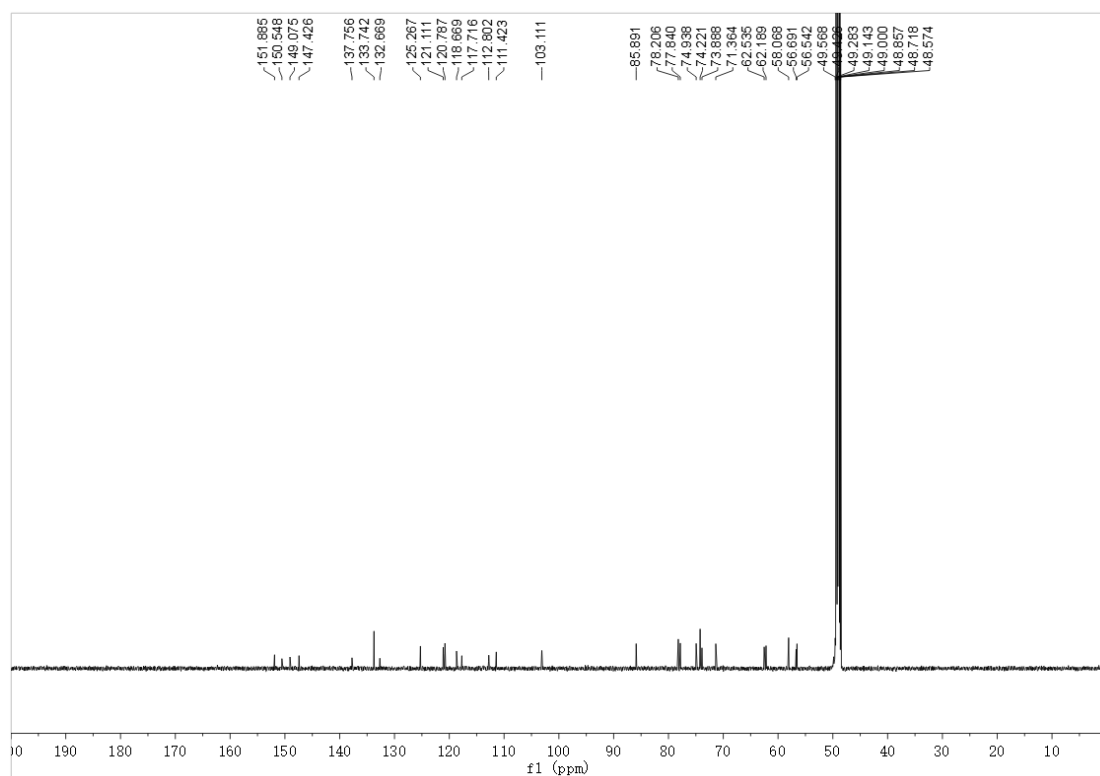

**Figure S59.** The  $^{13}\text{C}$  NMR Spectrum of Compound **7** in  $\text{CD}_3\text{OD}$ .

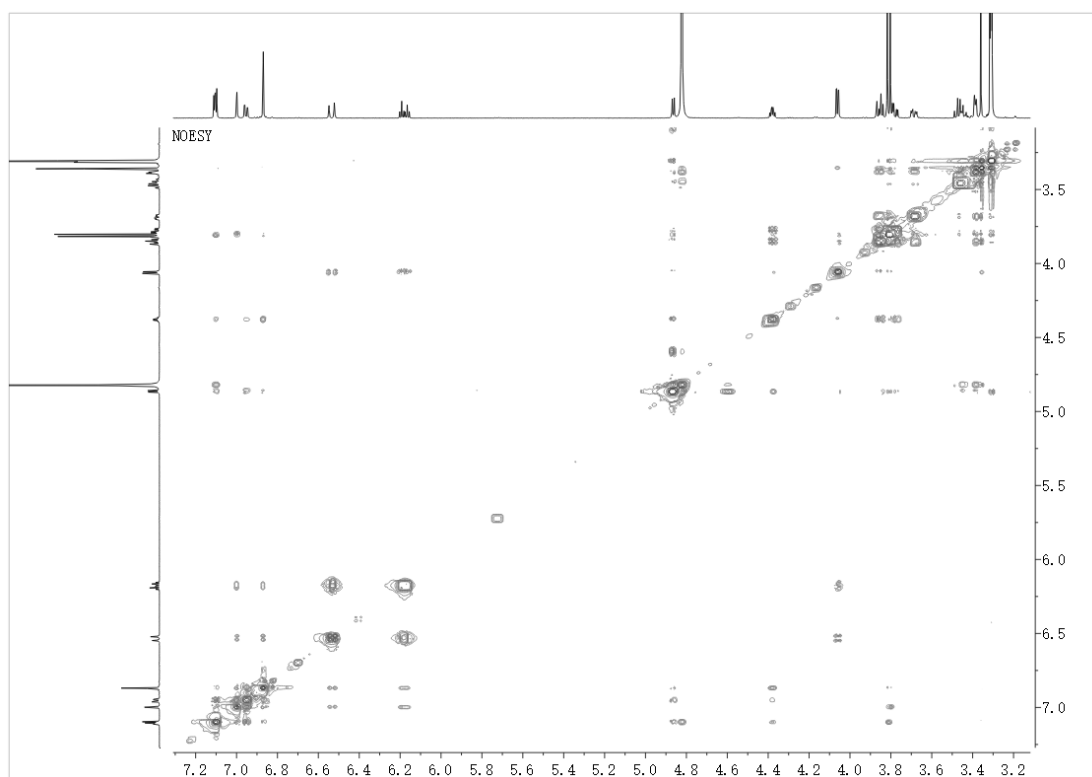

**Figure S60.** The NOESY Spectrum of Compound **7** in  $\text{CD}_3\text{OD}$ .

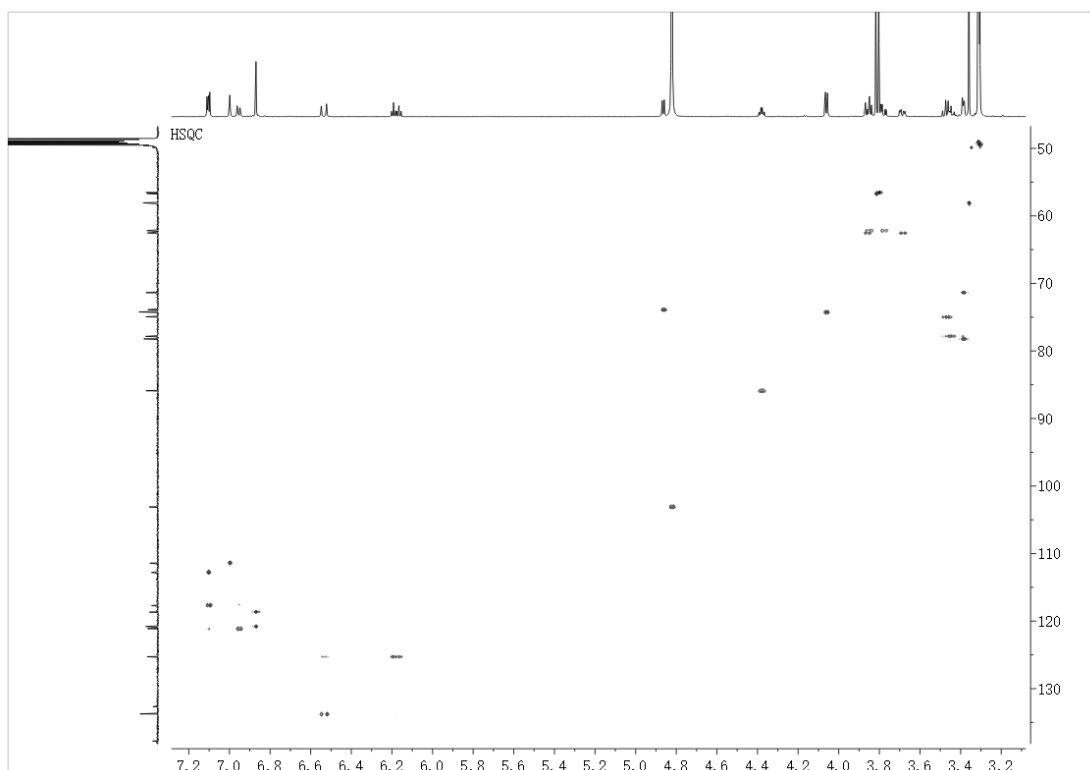

**Figure S61.** The HSQC Spectrum of Compound **7** in CD<sub>3</sub>OD.

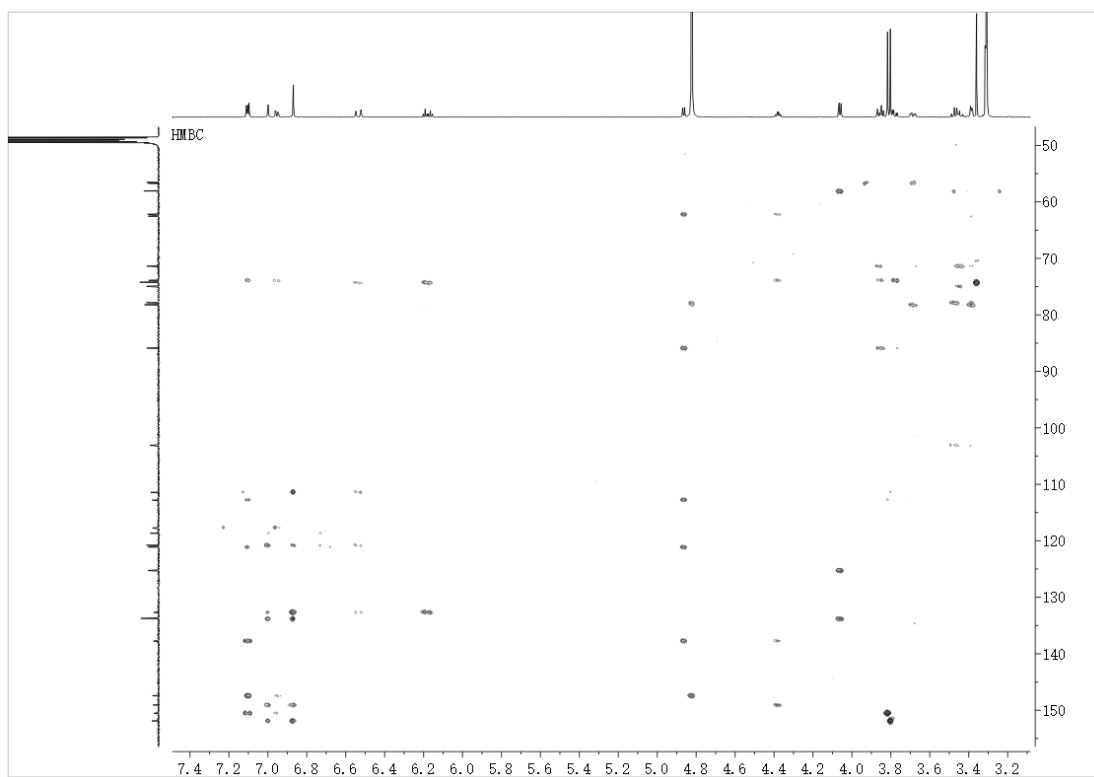

**Figure S62.** The HMBC Spectrum of Compound **7** in CD<sub>3</sub>OD.

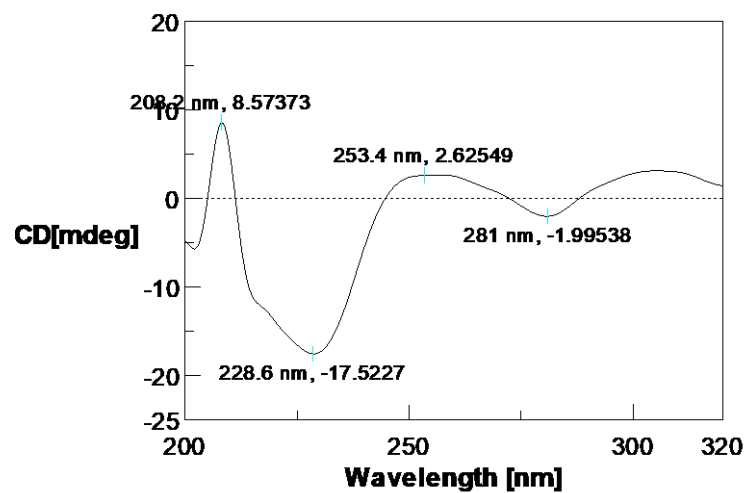

**Figure S63.** The CD Spectrum of Compound **7** in MeOH.

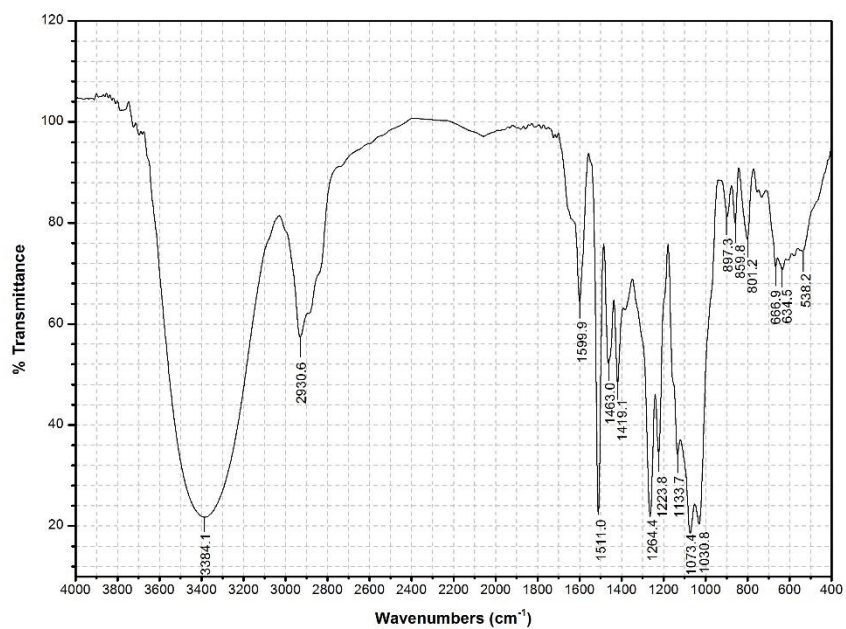

**Figure S64.** The IR Spectrum of Compound **8**.

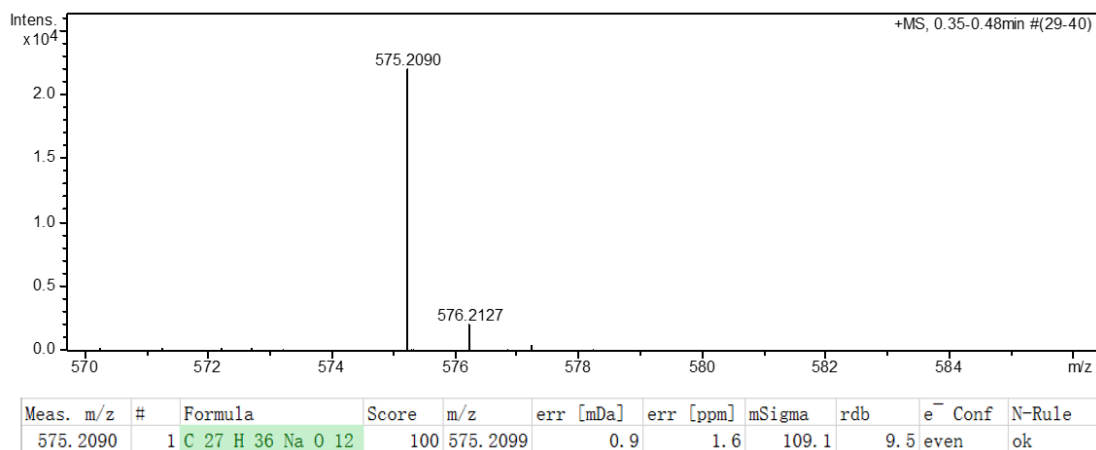

**Figure S65.** The (+)-HRESIMS Spectrum of Compound **8**.

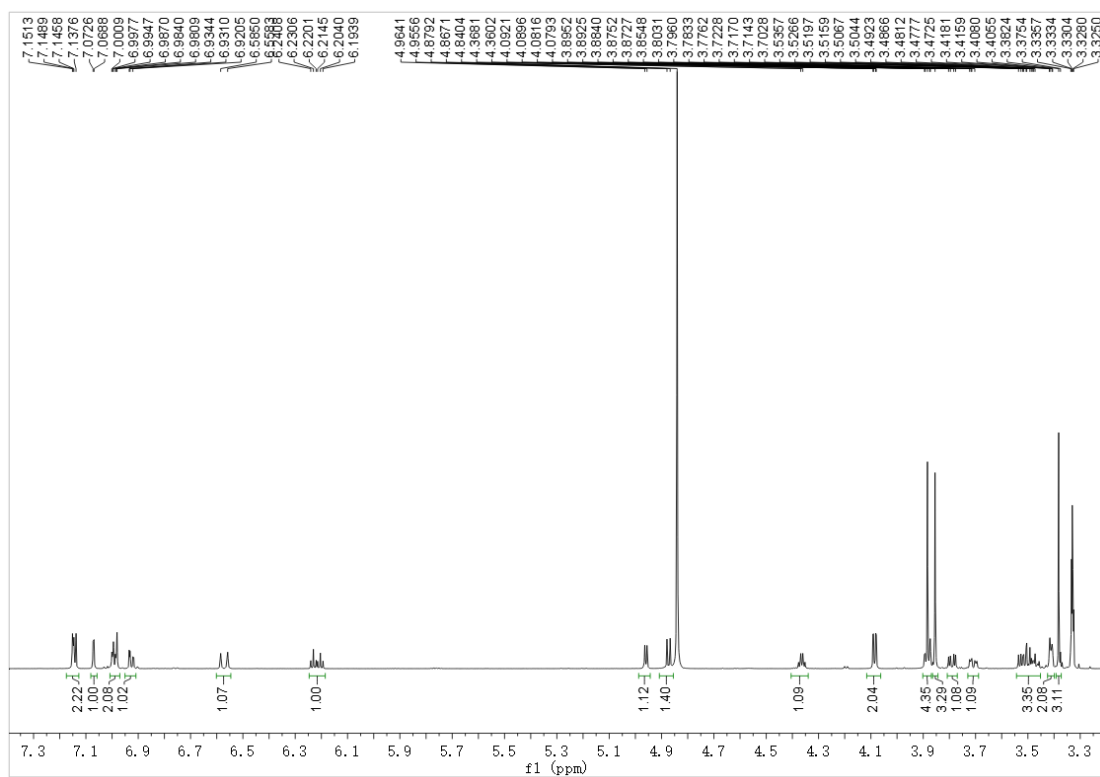

**Figure S66.** The <sup>1</sup>H NMR Spectrum of Compound **8** in CD<sub>3</sub>OD.

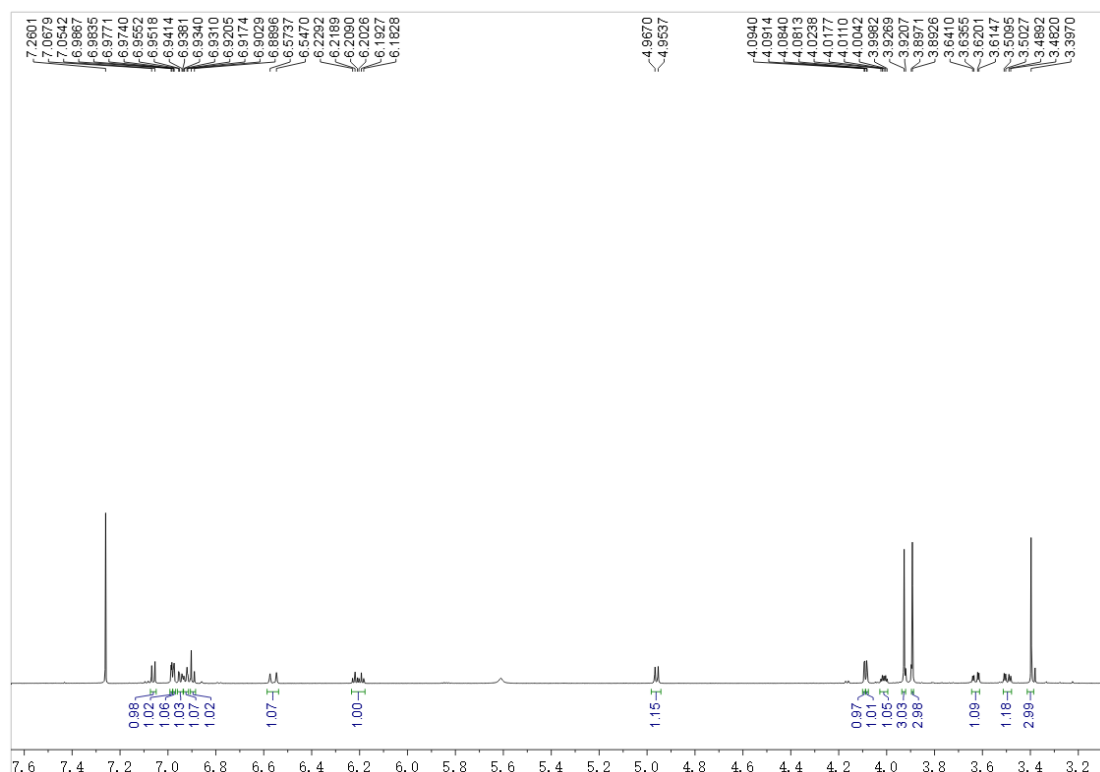

**Figure S67.** The <sup>1</sup>H NMR Spectrum of Compound **8a** in CDCl<sub>3</sub>.

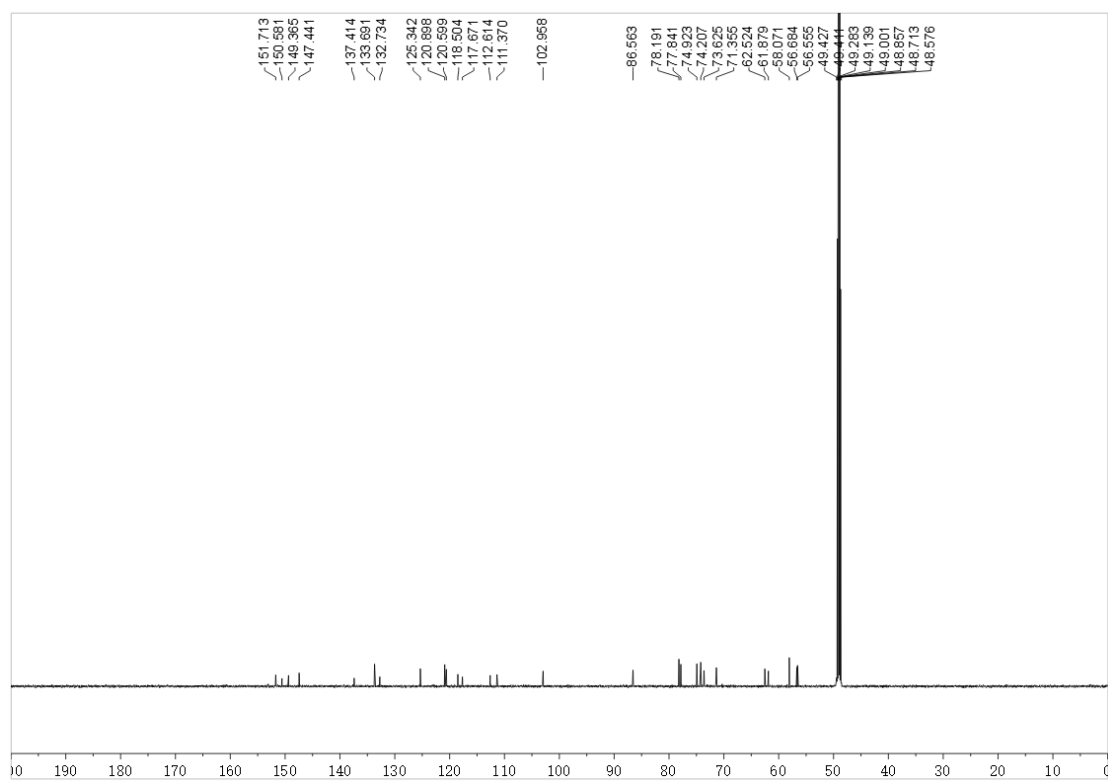

**Figure S68.** The <sup>13</sup>C NMR Spectrum of Compound **8** in CD<sub>3</sub>OD.

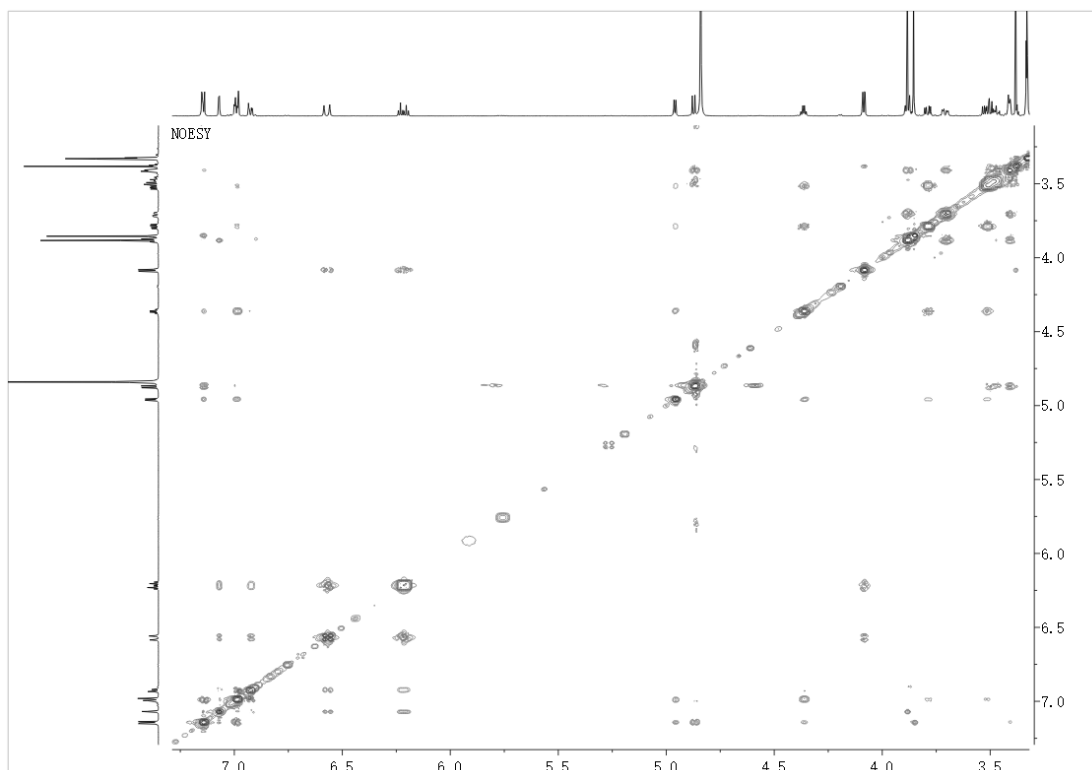

**Figure S69.** The NOESY Spectrum of Compound **8** in CD<sub>3</sub>OD.

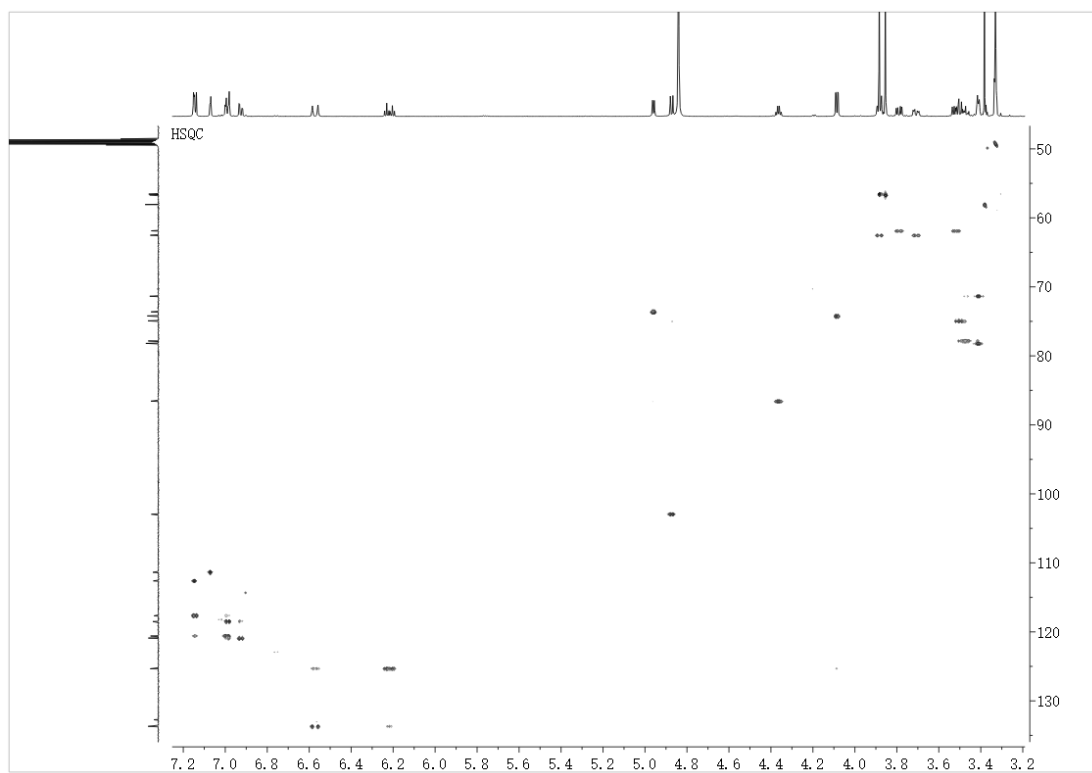

**Figure S70.** The HSQC Spectrum of Compound **8** in CD<sub>3</sub>OD.

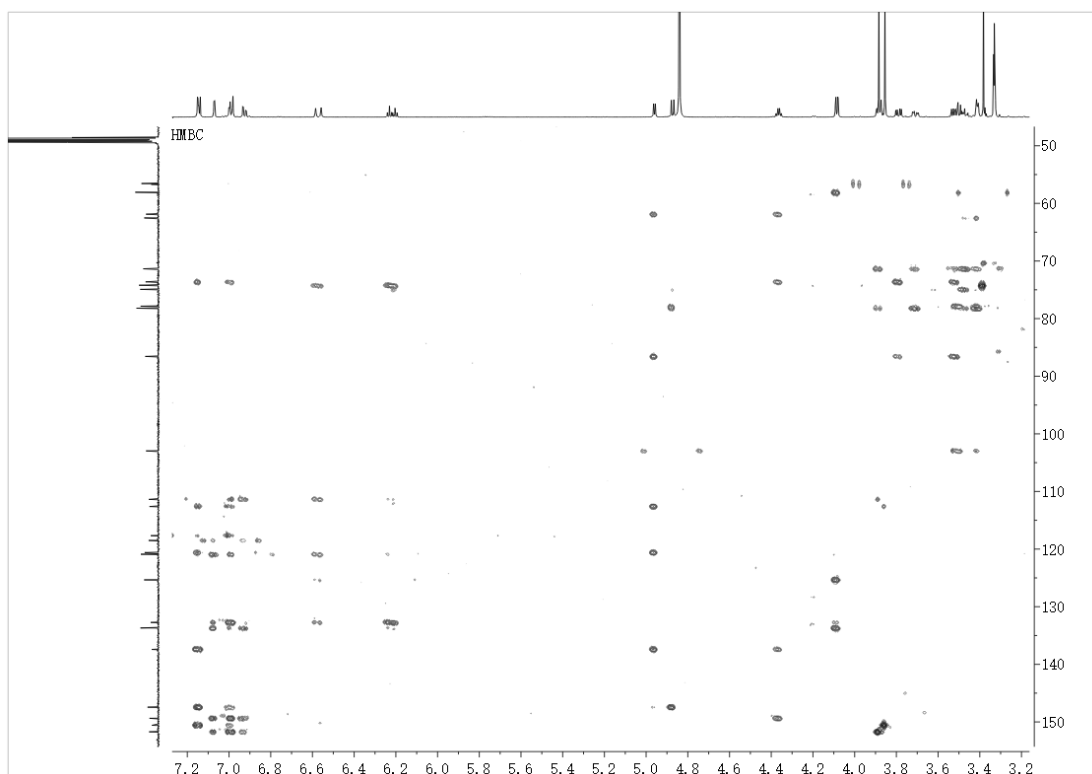

**Figure S71.** The HMBC Spectrum of Compound **8** in CD<sub>3</sub>OD.

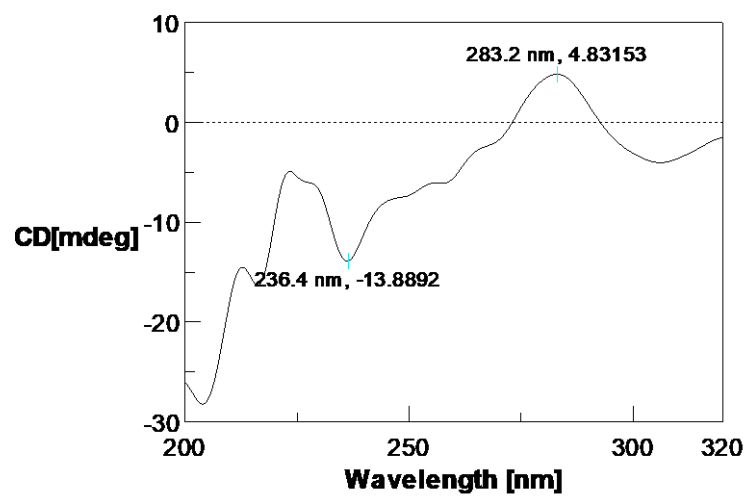

**Figure S72.** The CD Spectrum of Compound **8** in MeOH.



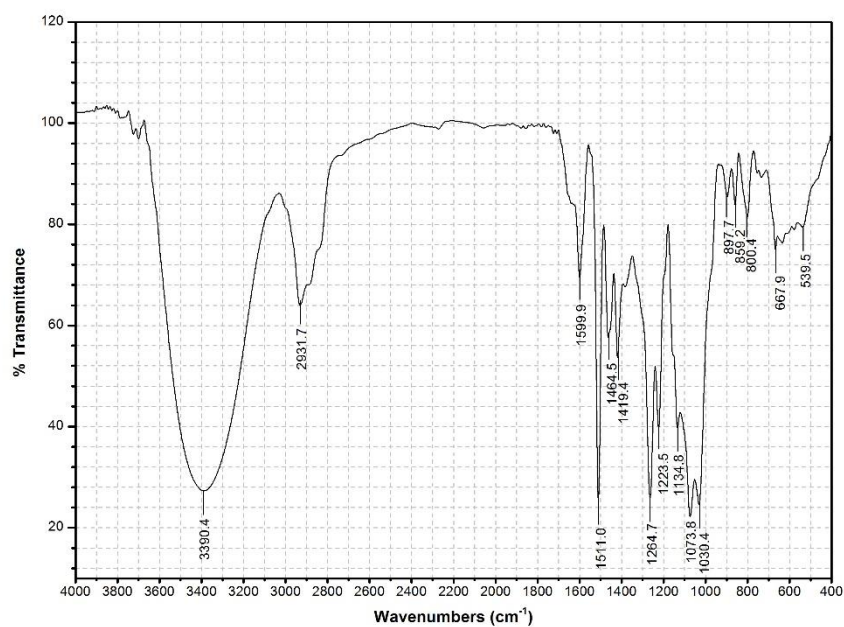

**Figure S73.** The IR Spectrum of Compound **9**.

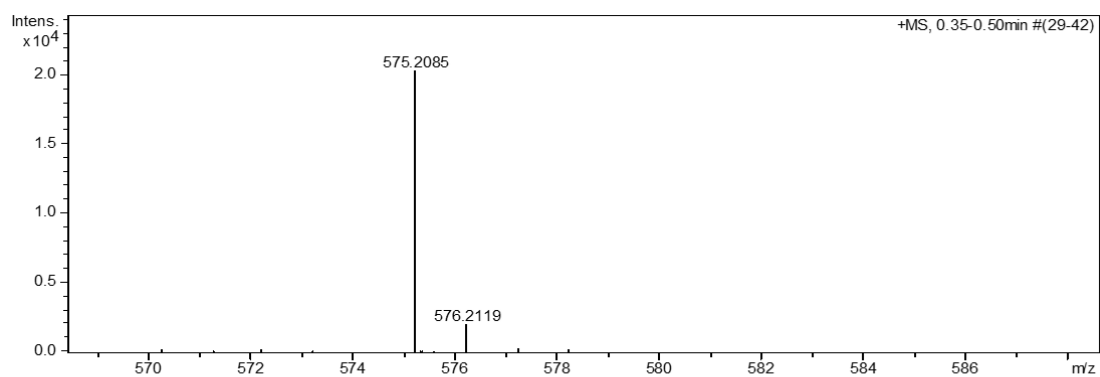

| Meas. m/z | # | Formula                                           | Score | m/z      | err [mDa] | err [ppm] | mSigma | rdB | e <sup>-</sup> Conf | N-Rule |
|-----------|---|---------------------------------------------------|-------|----------|-----------|-----------|--------|-----|---------------------|--------|
| 575.2085  | 1 | C <sub>27</sub> H <sub>36</sub> NaO <sub>12</sub> | 100   | 575.2099 | 1.4       | 2.5       | 107.4  | 9.5 | even                | ok     |

**Figure S74.** The (+)-HRESIMS Spectrum of Compound **9**.

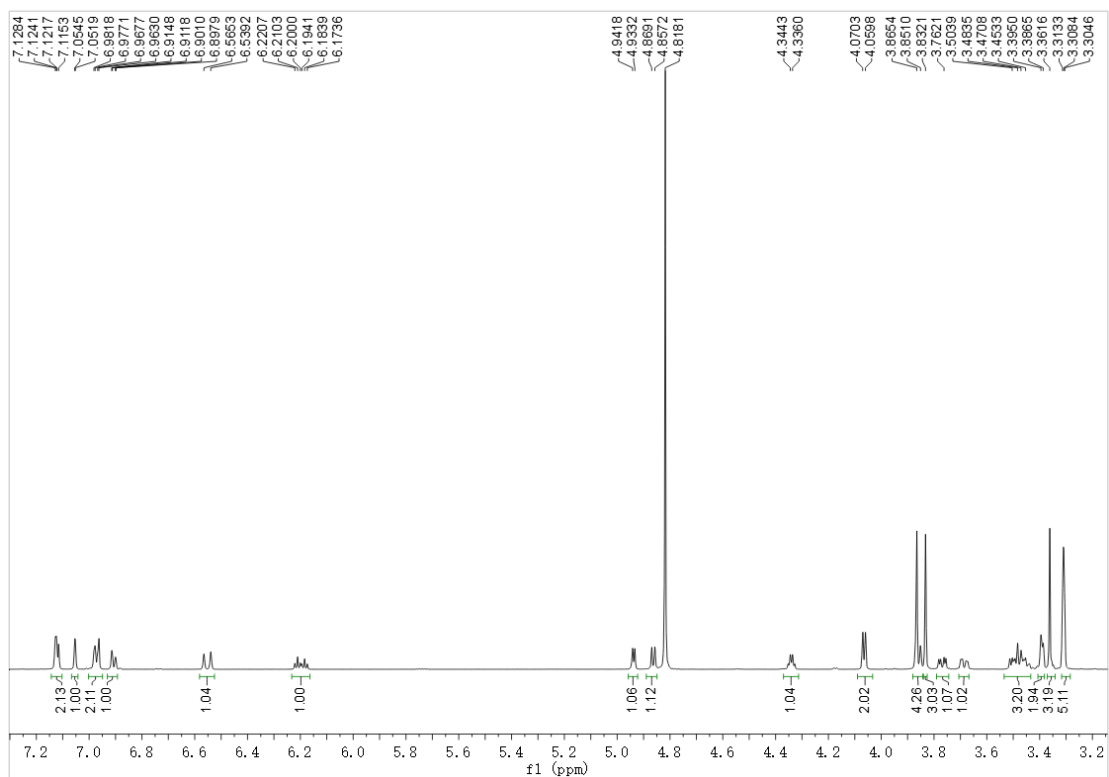

**Figure S75.** The <sup>1</sup>H NMR Spectrum of Compound **9** in CD<sub>3</sub>OD.

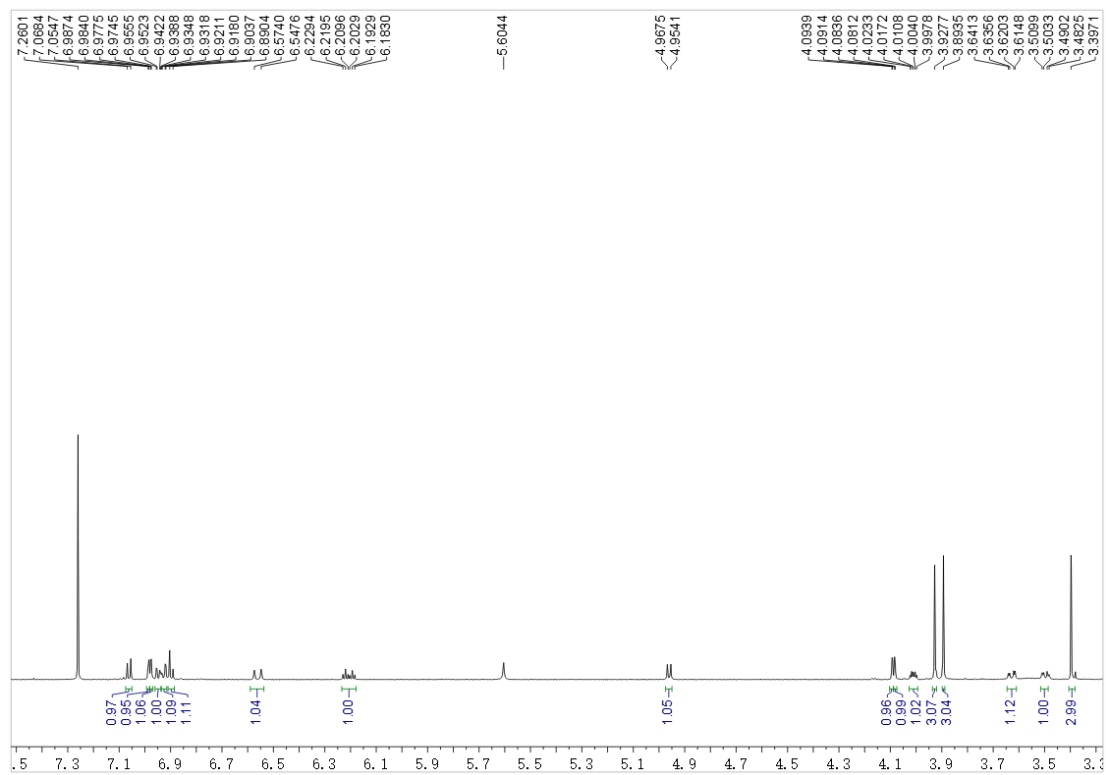

**Figure S76.** The <sup>1</sup>H NMR Spectrum of Compound **9a** in CDCl<sub>3</sub>.

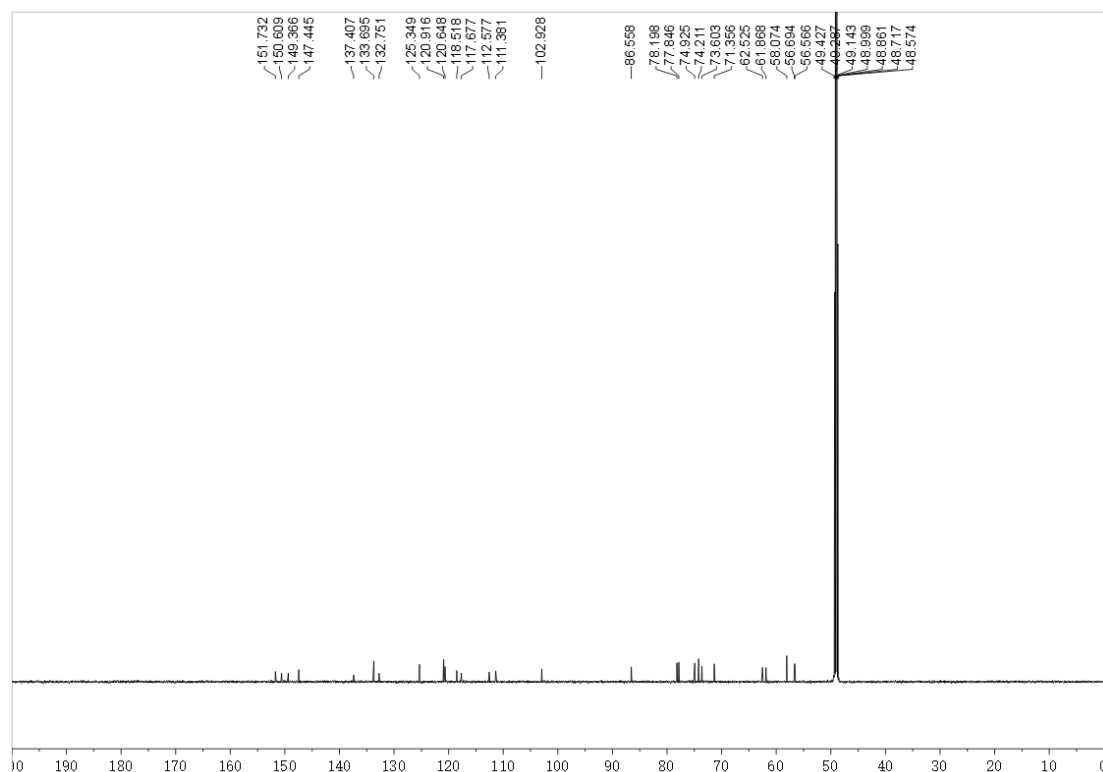

**Figure S77.** The  $^{13}\text{C}$  NMR Spectrum of Compound **9** in  $\text{CD}_3\text{OD}$ .

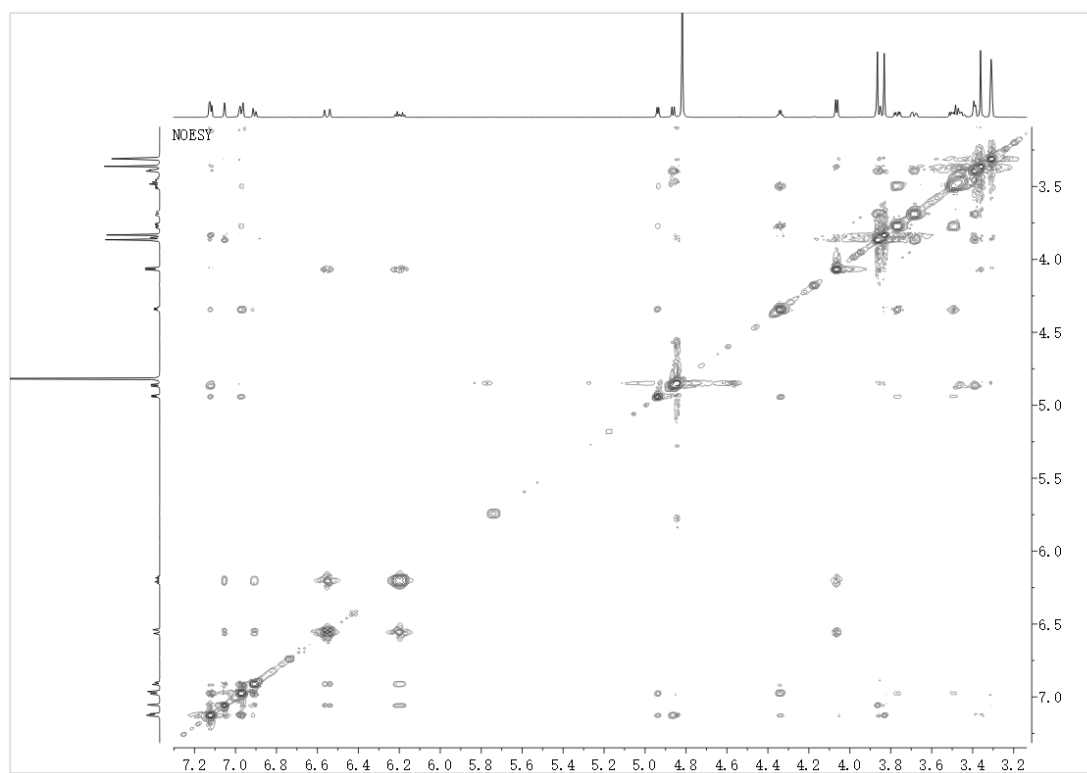

**Figure S78.** The NOESY Spectrum of Compound **9** in  $\text{CD}_3\text{OD}$ .

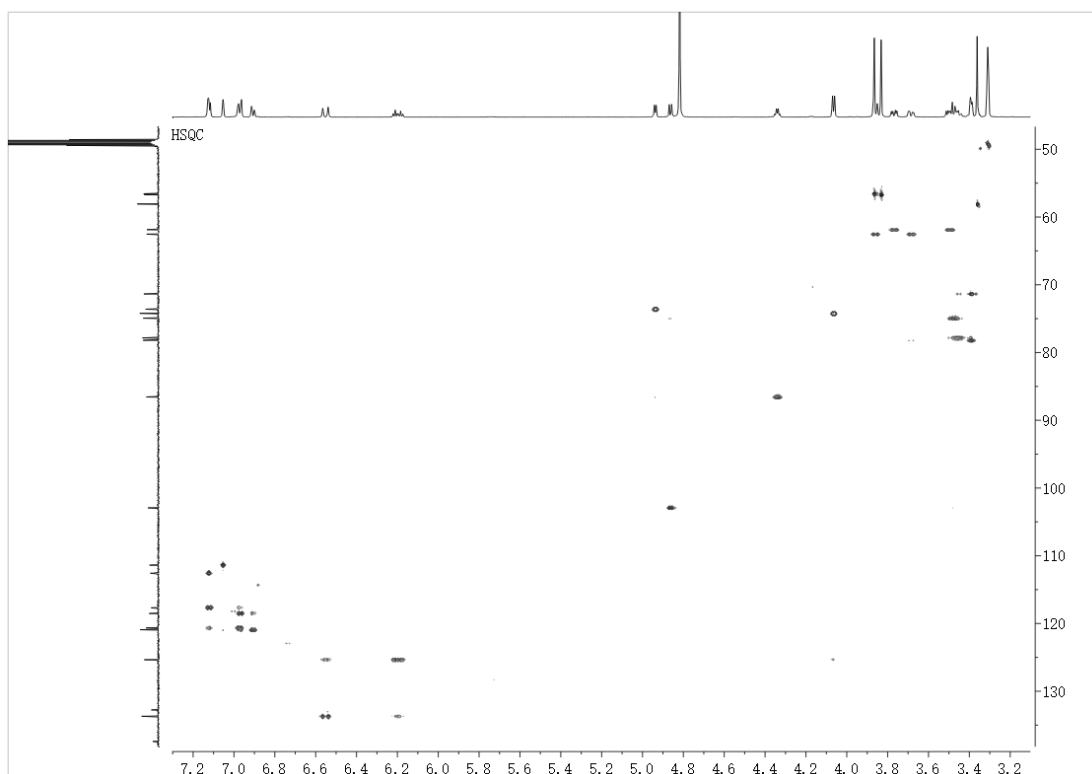

**Figure S79.** The HSQC Spectrum of Compound **9** in CD<sub>3</sub>OD.

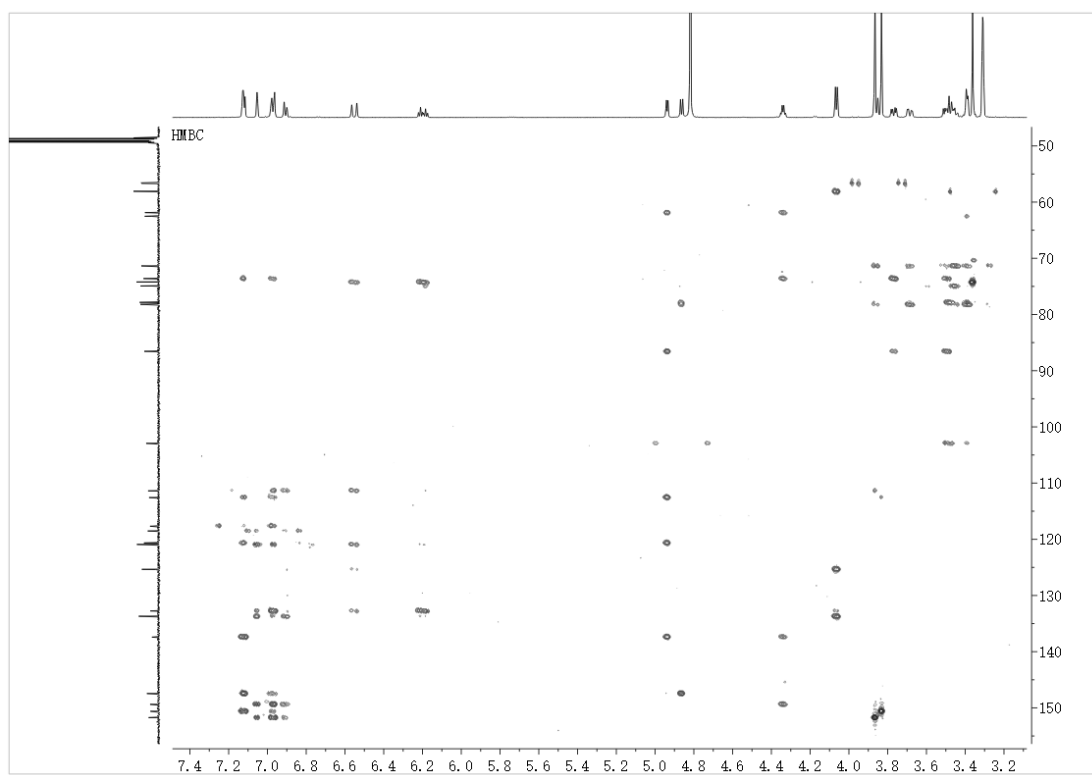

**Figure S80.** The HMBC Spectrum of Compound **9** in CD<sub>3</sub>OD.

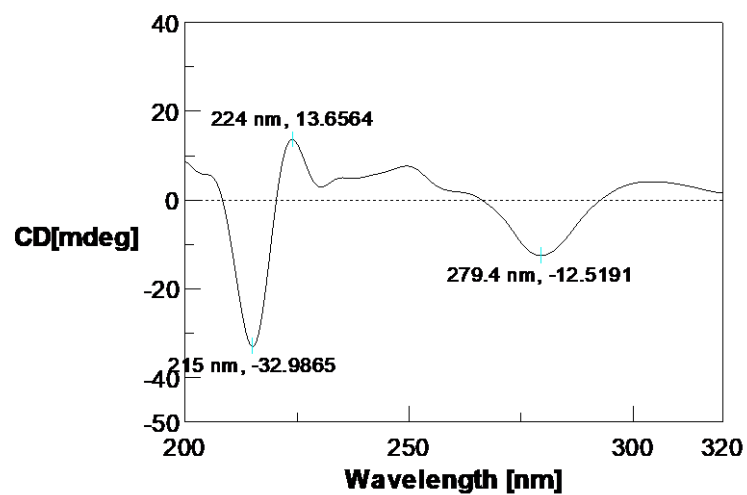

**Figure S81.** The CD Spectrum of Compound **9** in MeOH.

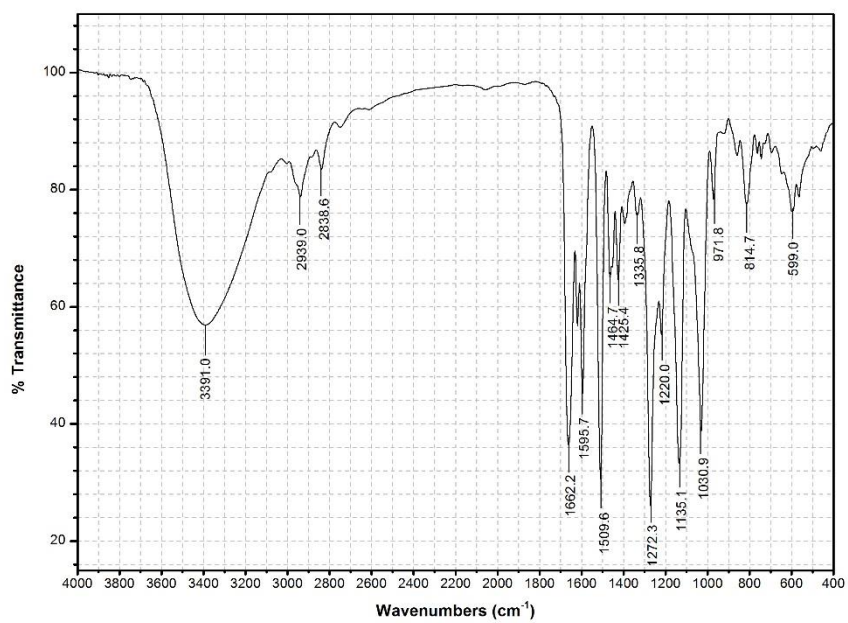

**Figure S82.** The IR Spectrum of Compound **10**.

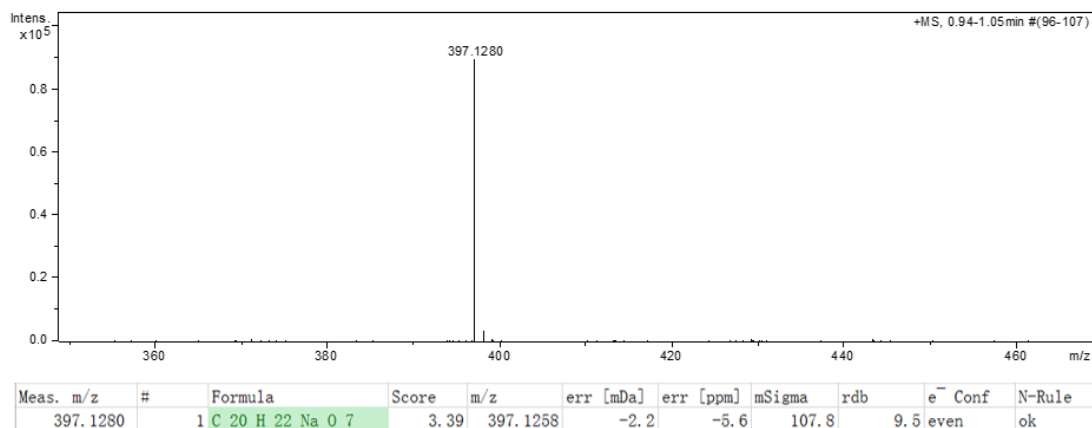

**Figure S83.** The (+)-HRESIMS Spectrum of Compound **10**.

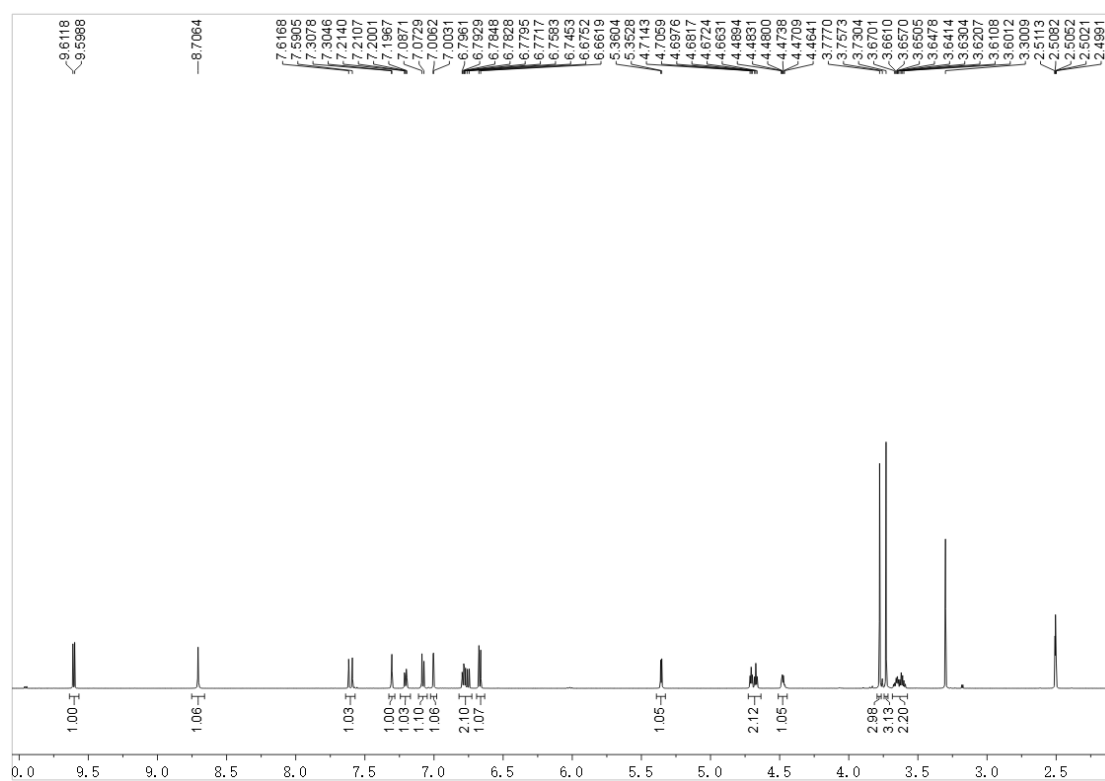

**Figure S84.** The <sup>1</sup>H NMR Spectrum of Compound **10** in DMSO-*d*<sub>6</sub>.

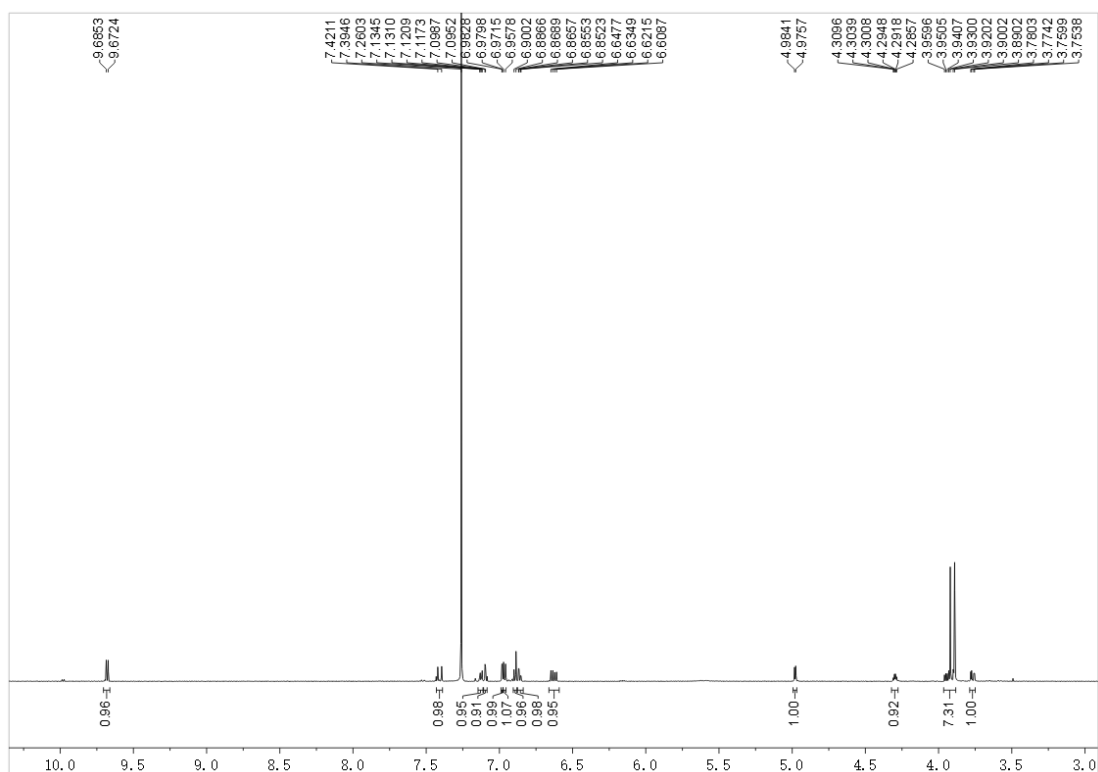

**Figure S85.** The  $^1\text{H}$  NMR Spectrum of Compound **10** in  $\text{CDCl}_3$ .

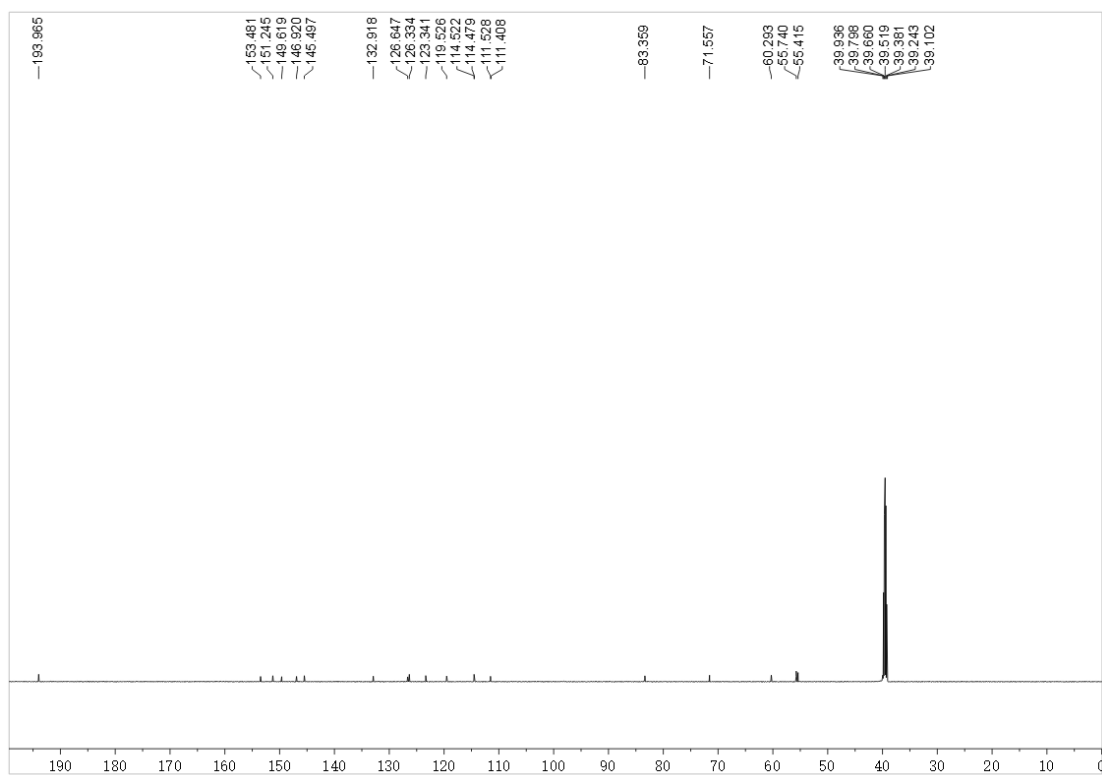

**Figure S86.** The  $^{13}\text{C}$  NMR Spectrum of Compound **10** in  $\text{DMSO}-d_6$ .

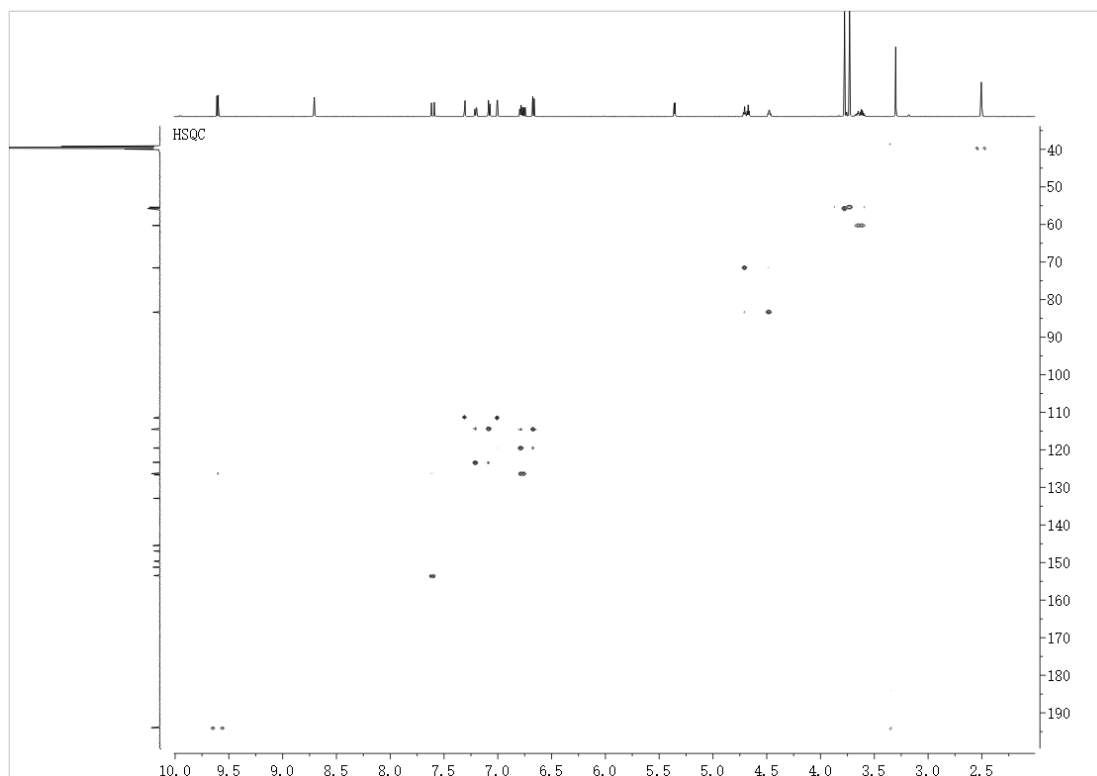

**Figure S87.** The HSQC Spectrum of Compound **10** in DMSO- $d_6$ .

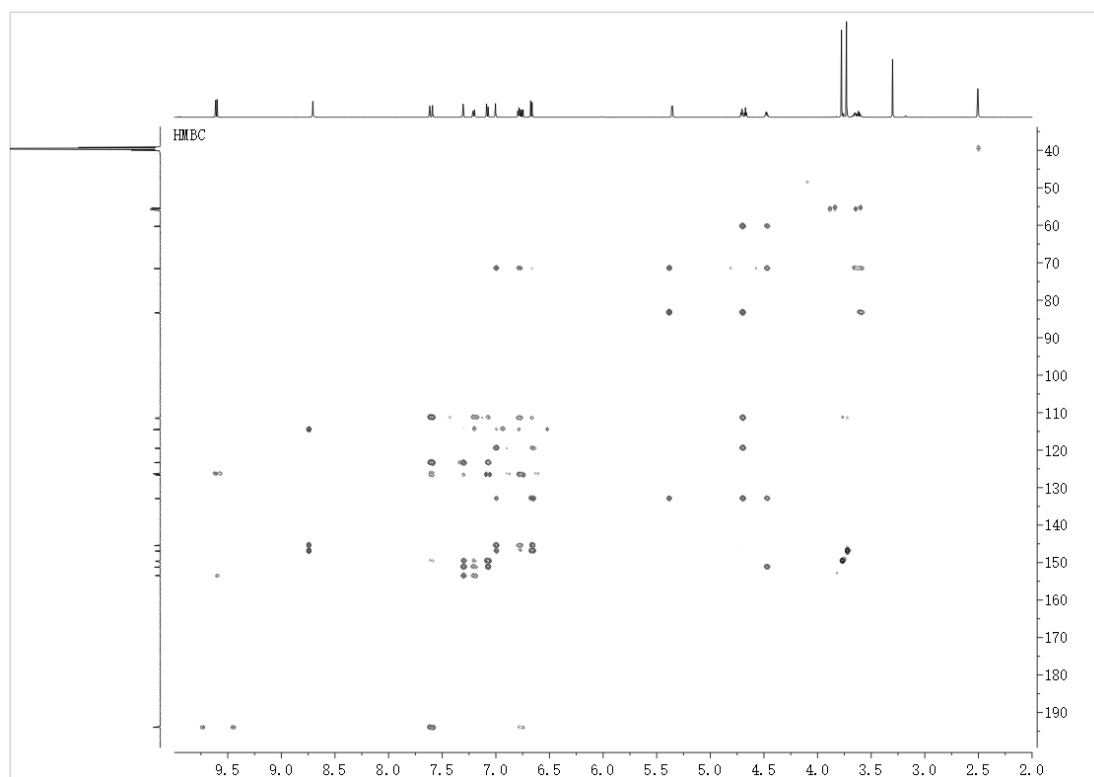

**Figure S88.** The HMBC Spectrum of Compound **10** in DMSO- $d_6$ .



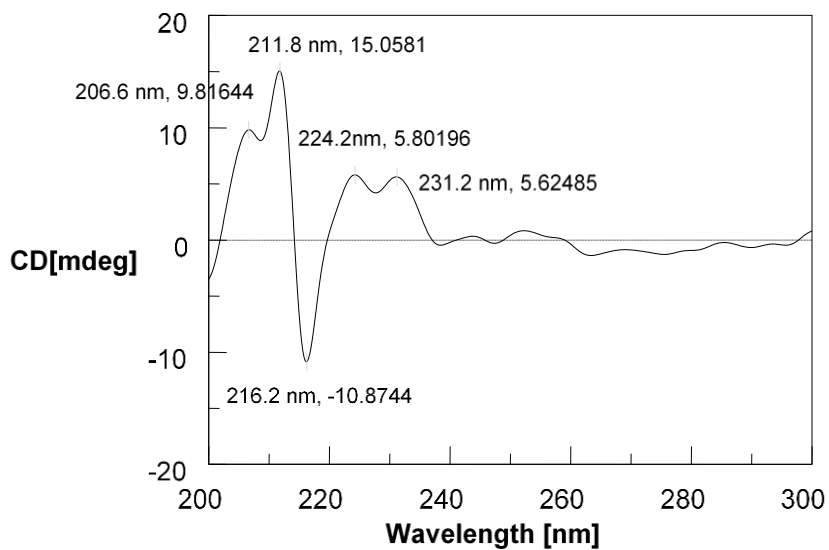

**Figure S89.** The CD Spectrum of Compound **10** in MeOH.

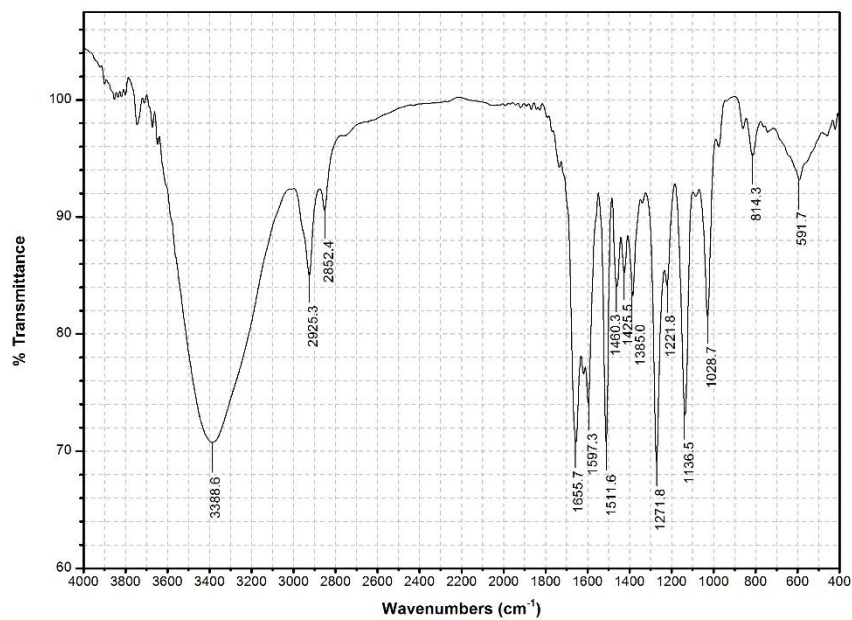

**Figure S90.** The IR Spectrum of Compound **11**.

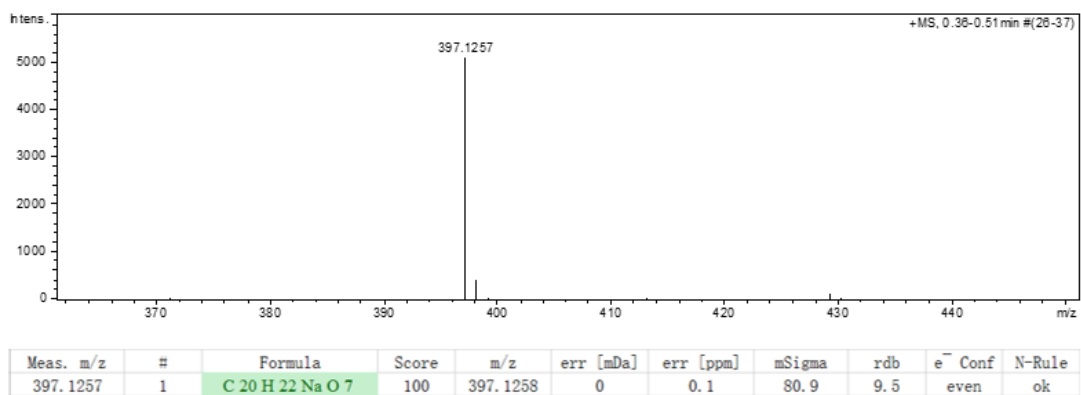

**Figure S91.** The (+)-HRESIMS Spectrum of Compound **11**.

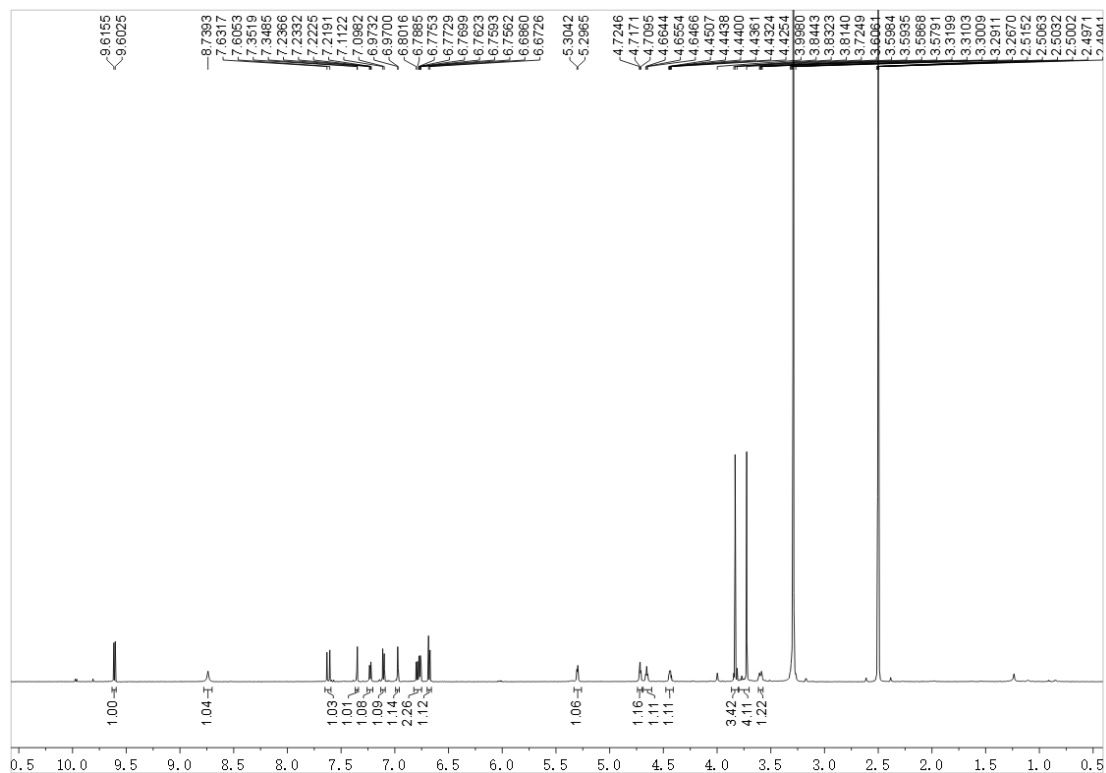

**Figure S92.** The <sup>1</sup>H NMR Spectrum of Compound **11** in DMSO-*d*<sub>6</sub>.

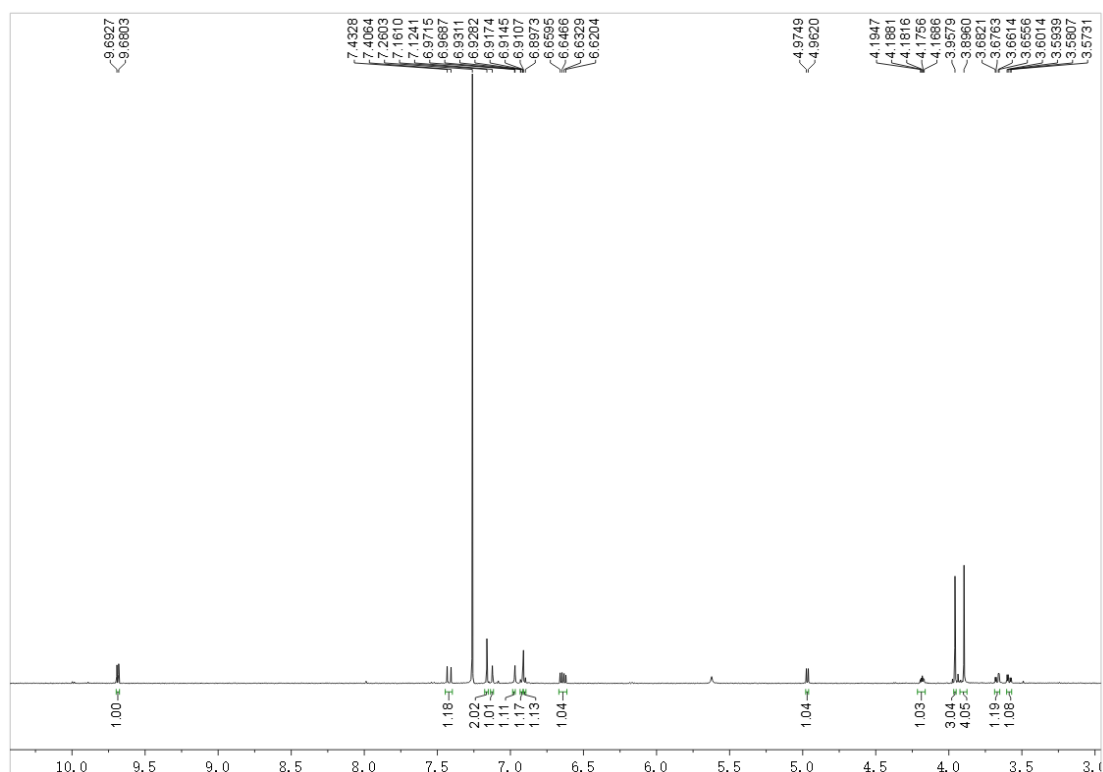

**Figure S93.** The <sup>1</sup>H NMR Spectrum of Compound **11** in CDCl<sub>3</sub>.

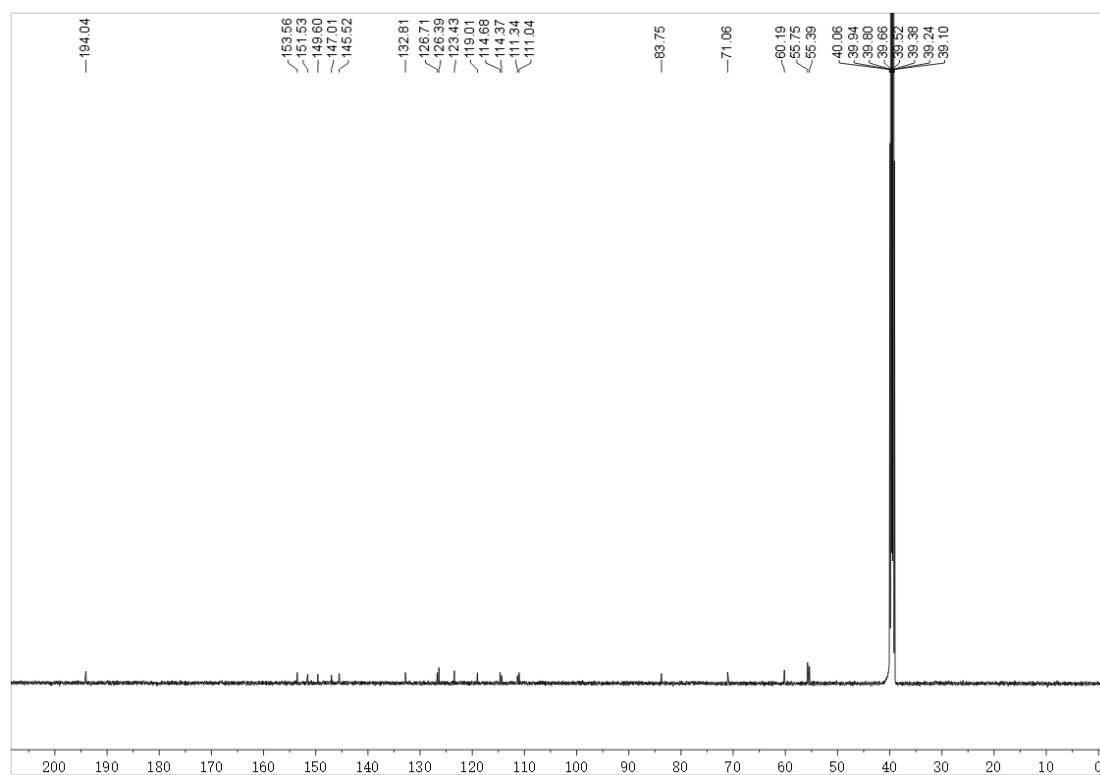

**Figure S94.** The <sup>13</sup>C NMR Spectrum of Compound **11** in DMSO-*d*<sub>6</sub>.

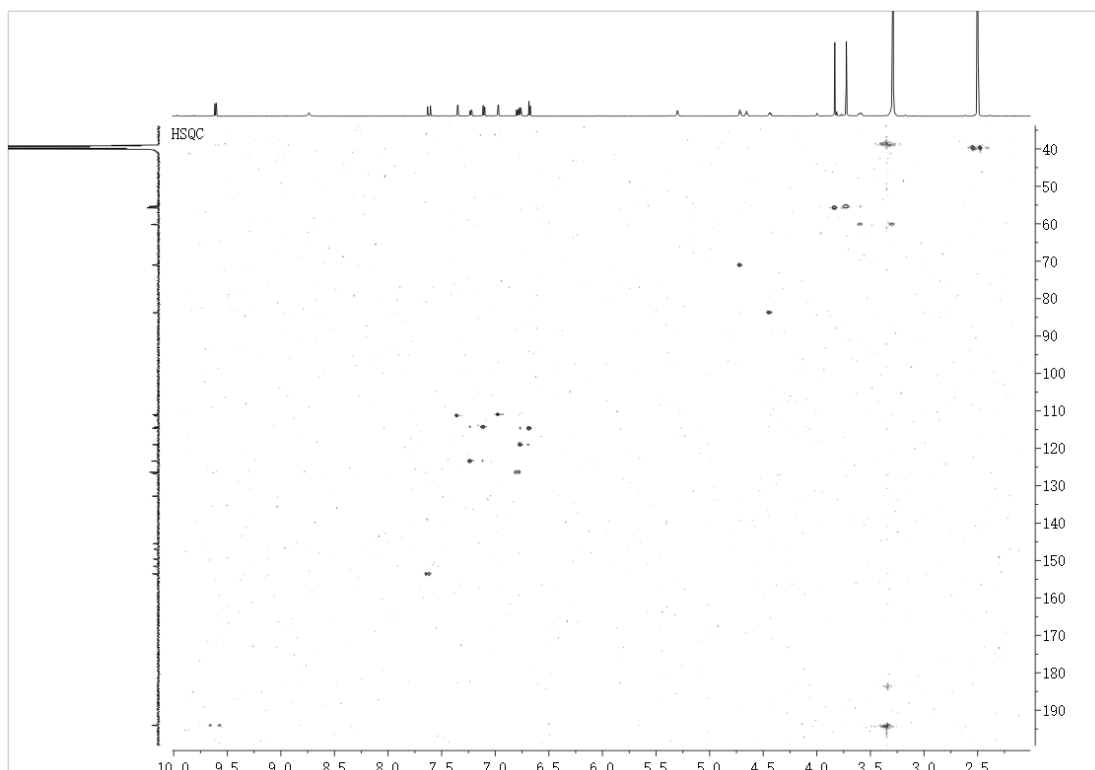

**Figure S95.** The HSQC Spectrum of Compound **11** in DMSO- $d_6$ .

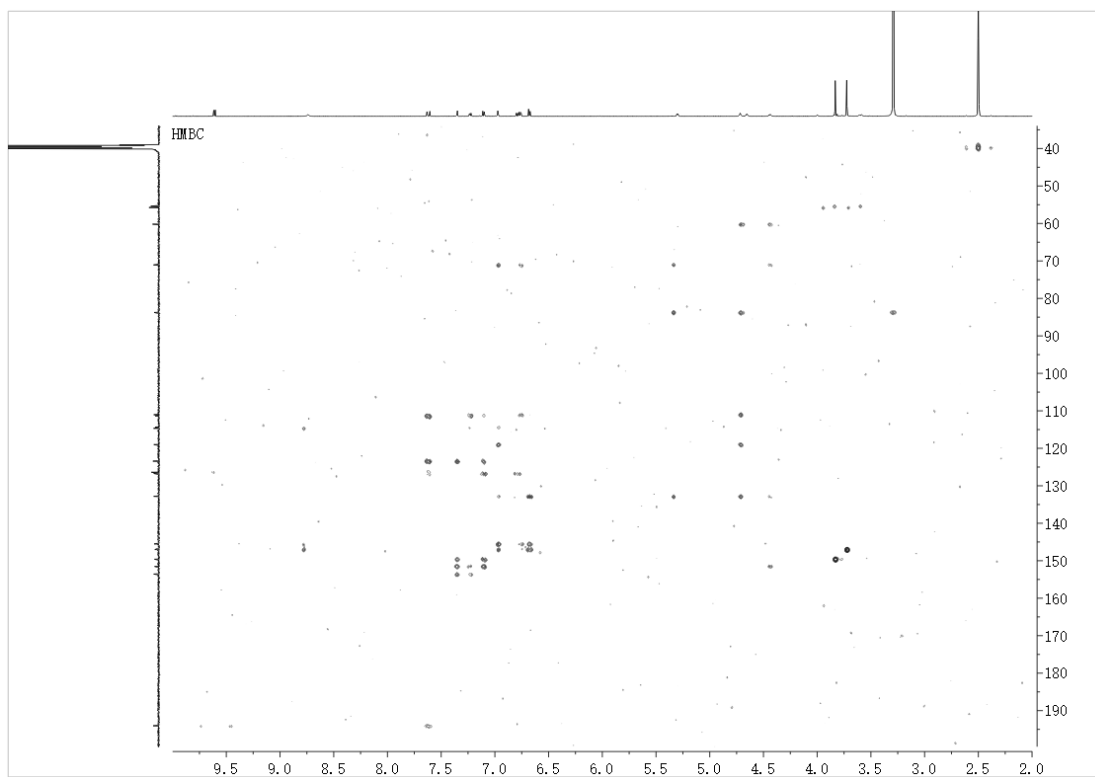

**Figure S96.** The HMBC Spectrum of Compound **11** in DMSO- $d_6$ .

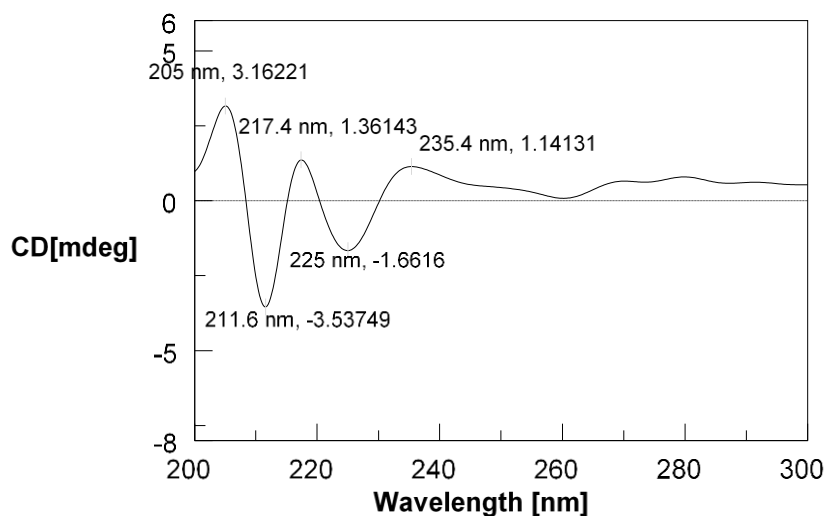

**Figure S97.** The CD Spectrum of Compound **11** in MeOH.

**Table S98.** The  $^1\text{H}$  NMR (600 MHz,  $\text{CDCl}_3$ ) spectroscopic data of **7a–9a**, **10**, **11**

| NO.                 | <b>7a</b>            | <b>8a</b>            | <b>9a</b>            | <b>10</b>            | <b>11</b>            |
|---------------------|----------------------|----------------------|----------------------|----------------------|----------------------|
| 2                   | 6.97 (d, 1.9)        | 6.99 (d, 1.9)        | 6.99 (d, 2.0)        | 6.98 (d, 1.8)        | 7.00 (d, 1.7)        |
| 5                   | 6.91 (d, 8.2)        | 7.06 (d, 8.2)        | 7.06 (d, 8.2)        | 6.90 (d, 8.2)        | 6.90 (d, 8.0)        |
| 6                   | 6.94 (dd, 8.2, 1.9)  | 6.95 (dd, 8.2, 1.9)  | 6.95 (dd, 8.2, 2.0)  | 6.86 (dd, 8.2, 1.8)  | 6.93 (dd, 8.0, 1.7)  |
| 7                   | 4.97 (d, 4.7)        | 4.96 (d, 8.0)        | 4.96 (d, 8.0)        | 4.98 (d, 5.0)        | 4.97 (d, 7.7)        |
| 8                   | 4.16 (m)             | 4.01 (m)             | 4.01 (m)             | 4.30 (m)             | 4.18 (m)             |
| 9                   | 3.89 (overlap)       | 3.91 (dd, 12.5, 3.7) | 3.63 (dd, 12.6, 3.4) | 3.95 (dd, 12.2, 5.5) | 3.67 (dd, 12.4, 3.5) |
|                     | 3.67 (dd, 12.2, 3.4) | 3.63 (dd, 12.5, 3.3) | 3.50 (dd, 12.6, 4.0) | 3.77 (dd, 12.2, 3.7) | 3.29 (dd, 12.4, 4.5) |
| 2'                  | 6.96 (d, 1.9)        | 6.98 (d, 1.9)        | 6.98 (d, 1.8)        | 7.10 (d, 2.1)        | 7.16 (br.s)          |
| 5'                  | 6.89 (d, 8.2)        | 6.90 (d, 8.0)        | 6.90 (d, 8.0)        | 6.97 (d, 8.2)        | 7.12 (br.s)          |
| 6'                  | 6.83 (dd, 8.2, 1.9)  | 6.93 (dd, 8.0, 1.9)  | 6.93 (dd, 8.0, 1.8)  | 7.13 (dd, 8.2, 2.1)  | 7.16 (br.s)          |
| 7'                  | 6.56 (dt, 15.7, 1.4) | 6.56 (dt, 16.0, 1.6) | 6.56 (dt, 15.9, 1.5) | 7.41 (d, 15.9)       | 7.42 (d, 15.8)       |
| 8'                  | 6.20 (dt, 15.7, 6.0) | 6.21 (dt, 16.0, 6.2) | 6.21 (dt, 15.9, 5.9) | 6.63 (dd, 15.9, 7.7) | 6.65 (dd, 15.8, 7.7) |
| 9'                  | 4.09 (dd, 6.0, 1.4)  | 4.09 (dd, 6.2, 1.6)  | 4.09 (dd, 5.9, 1.5)  | 9.68 (d, 7.7)        | 9.69 (d, 7.7)        |
| 3-OCH <sub>3</sub>  | 3.90 (s)             | 3.93 (s)             | 3.93 (s)             | 3.73 (s)             | 3.73 (s)             |
| 3'-OCH <sub>3</sub> | 3.89 (s)             | 3.89 (s)             | 3.89 (s)             | 3.77 (s)             | 3.83 (s)             |
| 9'-OCH <sub>3</sub> | 3.39 (s)             | 3.40 (s)             | 3.40 (s)             |                      |                      |

Proton coupling constants ( $J$ ) in Hz were given in parentheses.

**Table S99.** The ORD values of **7a–9a, 12a**

|                   | <b>7a</b> | <b>8a</b> | <b>9a</b> | <b>12a</b> |
|-------------------|-----------|-----------|-----------|------------|
| $[\alpha]_D^{23}$ | +23.3     | –26.4     | +26.4     | –23.3      |

The ORD values of **7a–9a, 12a** were measured in CHCl<sub>3</sub> at *c* = 0.05 g/100ml.

**Table S100.**  $\alpha$ -Glucosidase inhibitory, free radical scavenging and anti-inflammatory activities of the extracts from *V. fordiae* fruits

| Test material             | $\alpha$ -glucosidase inhibition<br>(IC <sub>50</sub> , $\mu$ g/mL) <sup>a</sup> | DPPH<br>(IC <sub>50</sub> , $\mu$ g/mL) <sup>a</sup> | ABTS<br>(IC <sub>50</sub> , $\mu$ g/mL) <sup>a</sup> | NO inhibition<br>(IC <sub>50</sub> , $\mu$ g/mL) <sup>a</sup> |
|---------------------------|----------------------------------------------------------------------------------|------------------------------------------------------|------------------------------------------------------|---------------------------------------------------------------|
| Petroleum ether extract   | > 500                                                                            | > 500                                                | > 500                                                | > 500                                                         |
| <i>n</i> -Butanol extract | 79.24 $\pm$ 4.31                                                                 | 108.73 $\pm$ 5.64                                    | 86.59 $\pm$ 4.18                                     | 68.61 $\pm$ 3.85                                              |
| Acarbose                  | 9.95 $\pm$ 0.31                                                                  |                                                      |                                                      |                                                               |
| Trolox                    |                                                                                  | 9.68 $\pm$ 0.82                                      | 6.58 $\pm$ 0.76                                      |                                                               |
| Indomethacin              |                                                                                  |                                                      |                                                      | 17.70 $\pm$ 0.96                                              |

<sup>a</sup> Values are represented as means  $\pm$  SD (n = 3)
